# Supplementary material for: Iridium-catalysed thioether-directed regioselective cycloaddition of internal alkynes with azides
Source: Royal Society of Chemistry journal article supplement (doi:10.1039/d2ob02082c), 2023-01-01

## Supporting Information

# Iridium-catalysed thioether-directed regioselective cycloaddition of internal alkynes with azides

Peng Ye,<sup>a</sup> Huan-Le Li,<sup>a</sup> Jun Pu,<sup>a</sup> Lei Chen,<sup>a</sup> Shuang Wang,<sup>a</sup> Zhen-Yuan Xu,<sup>a</sup> Shao-Jie  
Lou,<sup>\*a</sup> and Dan-Qian Xu<sup>\*a</sup>

Catalytic Hydrogenation Research Center, State Key Laboratory Breeding Base of  
Green Chemistry-Synthesis Technology, Zhejiang University of Technology,  
Hangzhou 310014, P. R. China

## Table of Contents

|                                                                           |    |
|---------------------------------------------------------------------------|----|
| I. General.....                                                           | 3  |
| II. Preparation of starting materials .....                               | 3  |
| III. Optimisation of reaction conditions.....                             | 5  |
| IV. General procedures for the cycloaddition of alkynes with azides ..... | 6  |
| V. Synthetic transformations .....                                        | 18 |
| VI. X-ray crystallographic data.....                                      | 21 |
| VII. References .....                                                     | 23 |
| VIII. NMR spectra .....                                                   | 24 |

## I. General

Unless otherwise stated, all experiments were carried out under air atmosphere. The reagents and solvents were purchased from commercial suppliers and used without further purification unless noted.  $^1\text{H}$  NMR and  $^{13}\text{C}$  NMR spectra were obtained on a Bruker AVANCE III HD 400 in  $\text{CDCl}_3$  using TMS as an internal standard, operating at 400 MHz and 101 MHz, respectively. Chemical shifts ( $\delta$ ) are expressed in ppm and coupling constants  $J$  are given in Hz. For  $\text{CDCl}_3$  solutions the chemical shifts are reported as parts per million (ppm) to residual protium or carbon of the solvents;  $\text{CHCl}_3$   $\delta$  (7.28 ppm) and  $\text{CDCl}_3$   $\delta\text{C}$  (77.03 ppm). Multiplicities are reported using the following abbreviations: s = singlet, d = doublet, t = triplet, q = quartet, dd = doublet of doublets, td = triplet of doublets, ddd = doublet of doublet of doublets, m = multiplet. GC experiments were carried out using Agilent 7890B GC. GC-MS experiments that used dodecane as an internal standard were performed with a Thermo DSQ II, Trace GC Ultra. High resolution mass spectra (HRMS (ESI-TOF)) were obtained on an Agilent 6545 Q-TOF LCMS spectrometer equipped with an ESI source.

## II. Preparation of starting materials

**S1** were purchased from commercial suppliers and used without further purification. **S2** were prepared according to the literature procedure<sup>[1]</sup>. **S3** were prepared according to the literature procedure<sup>[2]</sup>. Azides were prepared following the procedure<sup>[3]</sup>. These compounds **S2**, **S3**, and *azides* were known.

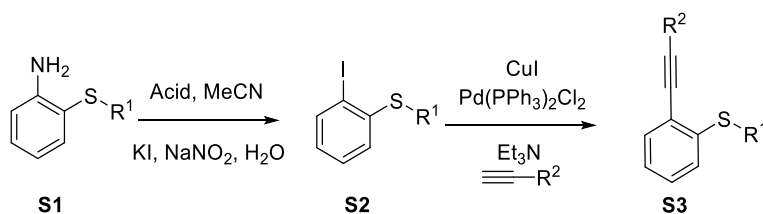

### Synthesis of **S2**

**S1** (24.8 mmol, 1.0 equiv) and  $\text{TsOH}\cdot\text{H}_2\text{O}$  (14.2 g, 74.7 mmol, 3.0 equiv) were suspended in 160 mL MeCN, KI (8.25 g, 47.7 mmol, 2.0 equiv) and  $\text{NaNO}_2$  (4.28 g,

62.1 mmol, 2.5 equiv) were dissolved in 90 mL H<sub>2</sub>O and added dropwise. After stirring at room temperature for 3h, 100 mL of a saturated NaHCO<sub>3</sub> solution were added followed by 100 ml of a saturated Na<sub>2</sub>S<sub>2</sub>O<sub>3</sub> solution. It was extracted three times with 100 mL DCM. The collected organic phases were dried over MgSO<sub>4</sub>. After solvent evaporation in vacuo, the crude product was purified via silica column chromatography (eluent: pentane) giving the product in form of an oil, which is solidified by storing it in a freezer.

### Synthesis of S3

To a solution of **S2** (5 mmol), CuI (2 mol%), and Pd(Ph<sub>3</sub>P)<sub>2</sub>Cl<sub>2</sub> (2 mol%) in triethylamine (15 mL) was added dropwise an alkyne (6 mmol) under N<sub>2</sub>. The reaction mixture was stirred for 5-10 h at 25 °C. Upon completion, the mixture was diluted with DCM and then washed with water and brine successively. The organic phase was dried with anhydrous Na<sub>2</sub>SO<sub>4</sub>, filtered, and concentrated under vacuum. The residue was purified through silica gel flash chromatography to give the desired product in mostly > 90% yield.

### Synthesis of azides

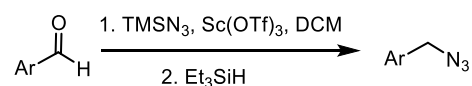

To a stirred solution of aldehyde (1.0 mmol) in dichloromethane (3.0 mL) at room temperature, azidotrimethylsilane (2.8 equiv, 2.8 mmol) was added followed by the addition of Sc(OTf)<sub>3</sub> (0.05 equiv, 5 mol %). The reaction mixture was stirred at 0 °C (or refluxed). Then triethylsilane (2.0 equiv., 2.0 mmol) was added dropwise at the same temperature. After the completion, the reaction mixture was extracted with CH<sub>2</sub>Cl<sub>2</sub> (20 mL × 3) and brine (8 mL). The organic portions were collected and dried over MgSO<sub>4</sub>. The solvent was removed under vacuum and the crude was purified by flash column chromatography (EtOAc/Hexane) on silica gel.

### III. Optimisation of reaction conditions

**Table S1.** Optimization of reaction conditions <sup>a</sup>

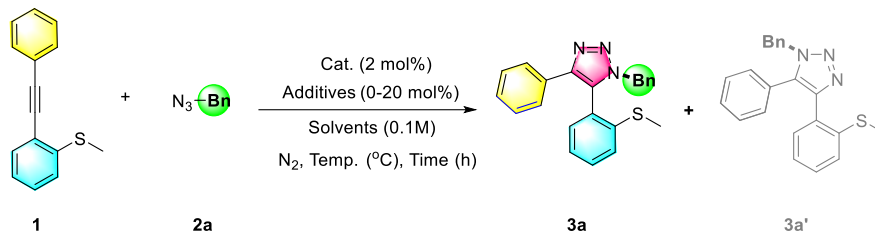

| Entry | Solvent                       | Cat. (2 mol%)                              | Add. (20 mol%)                  | T. (□) | Time | Yield (%) <sup>b</sup> |
|-------|-------------------------------|--------------------------------------------|---------------------------------|--------|------|------------------------|
| 1     | DCM                           | [Ir(cod)Cl] <sub>2</sub>                   | -                               | RT     | 12h  | 20                     |
| 2     | Toluene                       | [Ir(cod)Cl] <sub>2</sub>                   | -                               | RT     | 12h  | 10                     |
| 3     | EtOH                          | [Ir(cod)Cl] <sub>2</sub>                   | -                               | RT     | 12h  | 20                     |
| 4     | MeCN                          | [Ir(cod)Cl] <sub>2</sub>                   | -                               | RT     | 12h  | 21                     |
| 5     | THF                           | [Ir(cod)Cl] <sub>2</sub>                   | -                               | RT     | 12h  | 15                     |
| 6     | DCM                           | [Ir(cod)Cl] <sub>2</sub>                   | -                               | 30     | 12h  | 30                     |
| 7     | H <sub>2</sub> O <sup>d</sup> | [Ir(cod)Cl] <sub>2</sub>                   | -                               | RT     | 12h  | 10                     |
| 8     | DCM <sup>d</sup>              | [Ir(cod)Cl] <sub>2</sub>                   | -                               | RT     | 12h  | 12                     |
| 9     | DCM                           | [Ir(cod)Cl] <sub>2</sub>                   | -                               | 40     | 12h  | 33                     |
| 10    | H <sub>2</sub> O              | [Ir(cod)Cl] <sub>2</sub>                   | -                               | 40     | 12h  | 42                     |
| 11    | MeCN                          | [Ir(cod)Cl] <sub>2</sub>                   | -                               | 40     | 12h  | 18                     |
| 12    | H <sub>2</sub> O              | [Ir(cod)Cl] <sub>2</sub>                   | -                               | 80     | 12h  | 30                     |
| 13    | MeCN                          | [Ir(cod)Cl] <sub>2</sub>                   | -                               | 80     | 12h  | 23                     |
| 14    | DCE                           | [Ir(cod)Cl] <sub>2</sub>                   | -                               | RT     | 12h  | 15                     |
| 15    | Et <sub>2</sub> O             | [Ir(cod)Cl] <sub>2</sub>                   | -                               | RT     | 12h  | 8                      |
| 16    | Chlorobenzene                 | [Ir(cod)Cl] <sub>2</sub>                   | -                               | RT     | 12h  | 5                      |
| 17    | DMF                           | [Ir(cod)Cl] <sub>2</sub>                   | -                               | RT     | 12h  | n.r.                   |
| 18    | DCM                           | [Ir(cod)Cl] <sub>2</sub>                   | -                               | RT     | 48h  | 25                     |
| 19    | CHCl <sub>3</sub>             | [Ir(cod)Cl] <sub>2</sub>                   | -                               | RT     | 12h  | 15                     |
| 20    | DMSO                          | [Ir(cod)Cl] <sub>2</sub>                   | -                               | RT     | 12h  | n.r.                   |
| 21    | 1,4-Dioxane                   | [Ir(cod)Cl] <sub>2</sub>                   | -                               | RT     | 12h  | n.r.                   |
| 22    | n-Hexane                      | [Ir(cod)Cl] <sub>2</sub>                   | -                               | RT     | 12h  | 15                     |
| 23    | Acetone                       | [Ir(cod)Cl] <sub>2</sub>                   | -                               | RT     | 12h  | 18                     |
| 24    | -                             | [Ir(cod)Cl] <sub>2</sub>                   | -                               | RT     | 12h  | 12                     |
| 25    | CH <sub>3</sub> COOH          | [Ir(cod)Cl] <sub>2</sub>                   | -                               | RT     | 12h  | n.r.                   |
| 26    | DCM                           | CuI                                        | -                               | RT     | 12h  | n.r.                   |
| 27    | DCM                           | [Cp*Ru(PPh <sub>3</sub> ) <sub>2</sub> Cl] | -                               | RT     | 12h  | n.r.                   |
| 28    | DCM                           | [(Cp*RhCl <sub>2</sub> ) <sub>2</sub> ]    | -                               | RT     | 12h  | n.r.                   |
| 29    | DCM                           | [Ir(cod)Cl] <sub>2</sub>                   | AgSbF <sub>6</sub>              | RT     | 12h  | 42                     |
| 30    | DCM                           | [Ir(cod)Cl] <sub>2</sub>                   | CH <sub>3</sub> COOAg           | RT     | 12h  | 25                     |
| 31    | DCM                           | [Ir(cod)Cl] <sub>2</sub>                   | Ag <sub>3</sub> PO <sub>4</sub> | RT     | 12h  | 40                     |
| 32    | DCM                           | [Ir(cod)Cl] <sub>2</sub>                   | AgOTf                           | RT     | 12h  | 80                     |
| 33    | DCM                           | [Ir(cod)Cl] <sub>2</sub>                   | AgNO <sub>3</sub>               | RT     | 12h  | n.r.                   |
| 34    | DCM                           | [Ir(cod)Cl] <sub>2</sub>                   | AgBF <sub>4</sub>               | RT     | 12h  | 50                     |

|    |                   |                          |                                 |    |     |                      |
|----|-------------------|--------------------------|---------------------------------|----|-----|----------------------|
| 35 | DCM               | [Ir(cod)Cl] <sub>2</sub> | AgNTf <sub>2</sub>              | RT | 12h | 83                   |
| 36 | DCM               | [Ir(cod)Cl] <sub>2</sub> | NaBAr <sup>F</sup> <sub>4</sub> | RT | 12h | 99                   |
| 37 | DCM               | [Ir(cod)Cl] <sub>2</sub> | NaBAr <sup>F</sup> <sub>4</sub> | RT | 1h  | 99(95 <sup>c</sup> ) |
| 38 | DCM               | -                        | NaBAr <sup>F</sup> <sub>4</sub> | RT | 1h  | n.r.                 |
| 39 | MeCN              | [Ir(cod)Cl] <sub>2</sub> | NaBAr <sup>F</sup> <sub>4</sub> | RT | 1h  | 57                   |
| 40 | H <sub>2</sub> O  | [Ir(cod)Cl] <sub>2</sub> | NaBAr <sup>F</sup> <sub>4</sub> | RT | 1h  | 45                   |
| 41 | Et <sub>2</sub> O | [Ir(cod)Cl] <sub>2</sub> | NaBAr <sup>F</sup> <sub>4</sub> | RT | 1h  | 49                   |
| 42 | DMF               | [Ir(cod)Cl] <sub>2</sub> | NaBAr <sup>F</sup> <sub>4</sub> | RT | 1h  | 18                   |
| 43 | THF               | [Ir(cod)Cl] <sub>2</sub> | NaBAr <sup>F</sup> <sub>4</sub> | RT | 1h  | 46                   |
| 44 | EtOH              | [Ir(cod)Cl] <sub>2</sub> | NaBAr <sup>F</sup> <sub>4</sub> | RT | 1h  | 26                   |
| 45 | DCM <sup>d</sup>  | [Ir(cod)Cl] <sub>2</sub> | NaBAr <sup>F</sup> <sub>4</sub> | RT | 1h  | 55                   |

<sup>a</sup> Reaction conditions: **1** (0.1 mmol), **2** (1.5 equiv), Catalyst (2 mol%), Additives (0-20 mol%), solvents (1.0 mL), N<sub>2</sub>, r.t.- 40 °C, 1-12h ; <sup>b</sup>GC-MS yield, **3a:3a'** > 20:1 in all cases; <sup>c</sup>Isolated yield; <sup>d</sup>Under air atmosphere, 1h. Bn = Benzyl; cod = Cycloocta-1,5-diene, DCM = Dichloromethane, THF = Tetrahydrofuran.

#### IV. General procedures for the cycloaddition of alkynes with azides

A mixture of **S3** (0.4 mmol, 1.0 equiv), azide (0.75mmol 1.5 equiv), [Ir(cod)Cl]<sub>2</sub> (2 mol%), NaBAr<sup>F</sup><sub>4</sub> (20 mol%) in a 10 mL Schlenk tube was added the DCM (3.0 mL) under N<sub>2</sub>. Then the tube was sealed with a Teflon-lined screw cap and heated at RT for 1h to 12h. After the reaction was completed, quenched with water (2 mL) and extracted with dichloromethane (1 mL × 2). The combined organic layers were washed with water (5 mL) and dried over Na<sub>2</sub>SO<sub>4</sub>. Removal of solvent under reduced pressure afford a residue which is purified by chromatography on silica gel (petroleum ether/ethyl acetate = 5:1 to 2:1) to afford the desired compound **3a-3ad**.

#### Characterization of products **3a-3ad**.

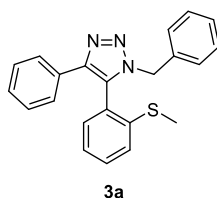

**1-benzyl-5-(2-(methylthio)phenyl)-4-phenyl-1H-1,2,3-triazole**, <sup>1</sup>H NMR (400 MHz, CDCl<sub>3</sub>) δ 7.61 - 7.55 (m, 2H), 7.49 (t, *J* = 7.7 Hz, 1H), 7.34 - 7.18 (m, 7H), 7.13 (tt, *J* = 7.5, 1.2 Hz, 1H), 7.03 – 6.97 (m, 2H), 6.90 (d, *J* = 7.5 Hz, 1H), 5.54 (d, *J* = 14.9 Hz, 1H), 5.19 (d, *J* = 14.9 Hz, 1H), 2.31 (s, 3H). <sup>13</sup>C NMR (101 MHz, CDCl<sub>3</sub>) δ 145.09,

140.55, 134.95, 131.62, 131.34, 131.02, 130.55, 128.44 (2C), 128.43 (2C), 128.04 (3C), 127.69, 126.16 (2C), 125.35, 125.00, 52.49, 15.16. HRMS (ESI, m/z): calcd. for  $C_{22}H_{20}N_3S^+ [M+H]^+$ : 358.1372, found: 358.1373.

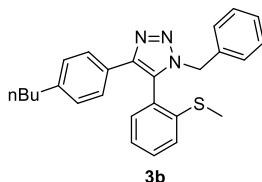

**1-benzyl-4-(4-butylphenyl)-5-(2-(methylthio)phenyl)-1H-1,2,3-triazole**,  $^1H$  NMR (400 MHz,  $CDCl_3$ )  $\delta$  7.57 - 7.43 (m, 3H), 7.32 (d,  $J = 8.0$  Hz, 1H), 7.28 - 7.16 (m, 3H), 7.16 - 7.06 (m, 3H), 7.00 (dd,  $J = 7.5, 2.0$  Hz, 2H), 6.89 (dd,  $J = 7.6, 1.5$  Hz, 1H), 5.53 (d,  $J = 15.0$  Hz, 1H), 5.19 (d,  $J = 15.0$  Hz, 1H), 2.57 (t, 2H), 2.29 (s, 3H), 1.62 - 1.52 (m, 2H), 1.39-1.29 (m, 2H), 0.92 (t,  $J = 7.3$  Hz, 3H).  $^{13}C$  NMR (101 MHz,  $CDCl_3$ )  $\delta$  145.16, 142.44, 140.58, 135.05, 131.37, 131.27, 130.53, 128.53 (2C), 128.44 (2C), 128.41, 128.03 (3C), 126.26, 126.01 (2C), 125.31, 124.99, 52.46, 35.37, 33.39, 22.32, 15.16, 13.94. HRMS (ESI, m/z): caclcd. for  $C_{26}H_{28}N_3S^+ [M+H]^+$ : 414.1998, found: 414.1999.

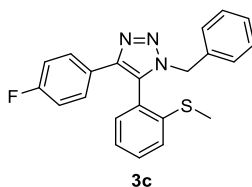

**1-benzyl-4-(4-fluorophenyl)-5-(2-(methylthio)phenyl)-1H-1,2,3-triazole**,  $^1H$  NMR (400 MHz,  $CDCl_3$ )  $\delta$  7.59 - 7.53 (m, 2H), 7.49 (td,  $J = 7.8, 1.5$  Hz, 1H), 7.33 - 7.28 (m, 1H), 7.26 - 7.17 (m, 3H), 7.15 - 7.10 (m, 1H), 7.05 - 6.98 (m, 2H), 6.98 - 6.86 (m, 3H), 5.51 (d,  $J = 14.9$  Hz, 1H), 5.19 (d,  $J = 14.9$  Hz, 1H), 2.29 (s, 3H).  $^{13}C$  NMR (101 MHz,  $CDCl_3$ )  $\delta$  162.40 (d,  $J = 246.9$  Hz), 144.33, 140.59, 134.86, 131.43, 131.25, 130.73, 128.48 (2C), 128.11, 128.06 (2C), 127.90 (d,  $J = 8.0$  Hz), 127.28 (d,  $J = 3.2$  Hz), 125.70, 125.22, 125.02, 115.42 (d,  $J = 21.5$  Hz), 52.53, 15.05.  $^{19}F$  NMR (376 MHz,  $CDCl_3$ )  $\delta$  -114.06. HRMS (ESI, m/z): caclcd. for  $C_{22}H_{19}N_3SF^+ [M+H]^+$ : 376.1278, found: 376.1279.

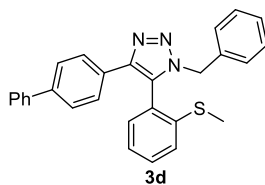

**4-([1,1'-biphenyl]-4-yl)-1-benzyl-5-(2-(methylthio)phenyl)-1H-1,2,3-triazole,**  $^1\text{H}$  NMR (400 MHz,  $\text{CDCl}_3$ )  $\delta$  7.67 - 7.62 (m, 2H), 7.57 - 7.45 (m, 5H), 7.42 - 7.36 (m, 2H), 7.34 - 7.28 (m, 2H), 7.23 - 7.15 (m, 3H), 7.15 - 7.11 (m, 1H), 7.01 - 6.88 (m, 3H), 5.53 (d,  $J = 15.0$  Hz, 1H), 5.19 (d,  $J = 15.0$  Hz, 1H), 2.31 (s, 3H).  $^{13}\text{C}$  NMR (101 MHz,  $\text{CDCl}_3$ )  $\delta$  140.69, 140.61, 140.31, 134.94, 131.36, 130.62, 130.03, 128.71 (2C), 128.47 (2C), 128.07 (2C), 127.28, 127.24, 127.17, 127.14 (2C), 126.90 (2C), 126.44 (2C), 126.11, 125.30, 125.08, 125.03, 52.53, 15.16. HRMS (ESI,  $m/z$ ): cacl. for  $\text{C}_{28}\text{H}_{24}\text{N}_3\text{S}^+$   $[\text{M}+\text{H}]^+$ : 434.1685, found: 434.1690.

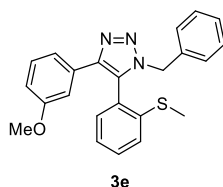

**1-benzyl-4-(3-methoxyphenyl)-5-(2-(methylthio)phenyl)-1H-1,2,3-triazole,**  $^1\text{H}$  NMR (400 MHz,  $\text{CDCl}_3$ )  $\delta$  7.51 - 7.45 (m, 1H), 7.32 (d,  $J = 8.1, 1.4$  Hz, 1H), 7.27 - 7.18 (m, 4H), 7.16 - 7.10 (m, 3H), 7.02 - 6.99 (m, 2H), 6.90 (dt,  $J = 7.6, 1.5$  Hz, 1H), 6.81 - 6.77 (m, 1H), 5.53 (d,  $J = 14.9$  Hz, 1H), 5.19 (d,  $J = 14.9$  Hz, 1H), 3.68 (s, 3H), 2.29 (s, 3H).  $^{13}\text{C}$  NMR (101 MHz,  $\text{CDCl}_3$ )  $\delta$  159.62, 144.92, 140.59, 134.93, 132.28, 131.77, 131.34, 130.60, 129.46, 128.46 (2C), 128.07, 128.05 (2C), 126.15, 125.35, 125.02, 118.50, 114.32, 110.84, 55.04, 52.49, 15.18. HRMS (ESI,  $m/z$ ): cacl. for  $\text{C}_{23}\text{H}_{22}\text{N}_3\text{OS}^+$   $[\text{M}+\text{H}]^+$ : 388.1478, found: 388.1477.

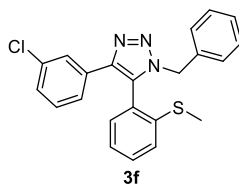

**1-benzyl-4-(3-chlorophenyl)-5-(2-(methylthio)phenyl)-1H-1,2,3-triazole,**  $^1\text{H}$  NMR (400 MHz,  $\text{CDCl}_3$ )  $\delta$  7.69-7.68 (t,  $J = 1.8$  Hz, 1H), 7.50 (td,  $J = 7.8, 1.5$  Hz, 1H), 7.38-7.31 (m, 2H), 7.25-7.13 (m, 6H), 7.01 (dd,  $J = 7.6, 2.0$  Hz, 2H), 6.89 (dd,  $J = 7.6, 1.4$  Hz, 1H), 5.47 (d,  $J = 15.0$  Hz, 1H), 5.20 (d,  $J = 15.0$  Hz, 1H), 2.31 (s, 3H).  $^{13}\text{C}$  NMR



(101 MHz, CDCl<sub>3</sub>)  $\delta$  143.78, 140.51, 134.76, 134.43, 132.87, 132.13, 131.17, 130.85, 129.69, 128.51 (2C), 128.15, 128.05 (2C), 127.71, 126.28, 125.50, 125.38, 125.09, 124.07, 52.55, 15.13. HRMS (ESI, m/z): cacl. for C<sub>22</sub>H<sub>19</sub>N<sub>3</sub>ClS<sup>+</sup> [M+H]<sup>+</sup>: 392.0983, found: 392.0985.

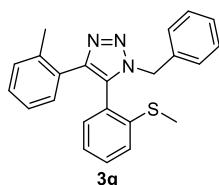

**1-benzyl-5-(2-(methylthio)phenyl)-4-(o-tolyl)-1H-1,2,3-triazole**, <sup>1</sup>H NMR (400 MHz, CDCl<sub>3</sub>)  $\delta$  7.37-7.31 (m, 1H), 7.23-7.10 (m, 7H), 7.05-6.95 (m, 4H), 6.86 (dd, *J* = 7.6, 1.5 Hz, 1H), 5.56 (d, *J* = 14.9 Hz, 1H), 5.26 (d, *J* = 14.9 Hz, 1H), 2.37 (s, 3H), 2.24 (s, 3H). <sup>13</sup>C NMR (101 MHz, CDCl<sub>3</sub>)  $\delta$  146.56, 140.26, 137.64, 135.10, 133.16, 131.46, 130.37, 130.26, 130.19, 128.49 (3C), 128.09, 128.03 (3C), 125.78, 125.34, 125.27, 124.69, 52.71, 20.65, 15.36. HRMS (ESI, m/z): cacl. for C<sub>23</sub>H<sub>22</sub>N<sub>3</sub>S<sup>+</sup> [M+H]<sup>+</sup>: 372.1529, found: 372.1532.

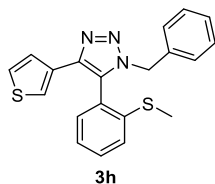

**1-benzyl-5-(2-(methylthio)phenyl)-4-(thiophen-3-yl)-1H-1,2,3-triazole**, <sup>1</sup>H NMR (400 MHz, CDCl<sub>3</sub>)  $\delta$  7.50 (td, *J* = 7.7, 1.5 Hz, 2H), 7.35-7.19 (m, 7H), 7.16-7.12 (m, 1H), 7.03-6.99 (m, 2H), 6.91 (dd, *J* = 7.6, 1.5 Hz, 1H), 5.54 (d, *J* = 15.0 Hz, 1H), 5.19 (d, *J* = 15.0 Hz, 1H), 2.31 (s, 3H). <sup>13</sup>C NMR (101 MHz, CDCl<sub>3</sub>)  $\delta$  142.11, 140.66, 134.93, 131.97, 131.38, 131.09, 130.69, 128.46 (2C), 128.07 (2C), 128.02, 125.92, 125.87, 125.48, 125.44, 125.04, 121.12, 52.52, 15.21. HRMS (ESI, m/z): cacl. for C<sub>20</sub>H<sub>18</sub>N<sub>3</sub>S<sub>2</sub><sup>+</sup> [M+H]<sup>+</sup>: 364.0937, found: 364.0937.

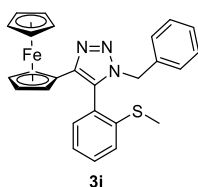

**1-benzyl-4-(ferrocenyl)-5-(2-(methylthio)phenyl)-1H-1,2,3-triazole**,  $^1\text{H}$  NMR (400 MHz,  $\text{CDCl}_3$ )  $\delta$  7.46 (td,  $J = 7.7, 1.5$  Hz, 1H), 7.31 (dd,  $J = 8.1, 1.1$  Hz, 1H), 7.22–7.10 (m, 4H), 6.93 (dd,  $J = 7.6, 2.0$  Hz, 2H), 6.82 (dd,  $J = 7.6, 1.5$  Hz, 1H), 5.51 (d,  $J = 15.0$  Hz, 1H), 5.10 (d,  $J = 15.0$  Hz, 1H), 4.58 (s, 1H), 4.41 (s, 1H), 4.22 (d,  $J = 10.5$  Hz, 2H), 4.11 (s, 5H), 2.37 (s, 3H).  $^{13}\text{C}$  NMR (101 MHz,  $\text{CDCl}_3$ )  $\delta$  144.83, 140.50, 135.15, 131.55, 130.53, 130.17, 128.42 (2C), 127.98, 127.88 (2C), 125.91, 124.83, 124.68, 69.96 (2C), 68.81, 68.78, 66.81, 66.59, 52.44, 15.05. HRMS (ESI,  $m/z$ ): calcd. for  $\text{C}_{26}\text{H}_{24}\text{FeN}_3\text{S}^+ [\text{M}+\text{H}]^+$ : 466.1082, found:466.1078.

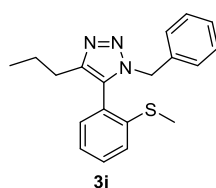

**1-benzyl-5-(2-(methylthio)phenyl)-4-propyl-1H-1,2,3-triazole**,  $^1\text{H}$  NMR (600 MHz,  $\text{CDCl}_3$ )  $\delta$  7.43-7.4 (m, 1H), 7.34 (d,  $J = 8.0$  Hz, 1H), 7.25-7.15 (m, 3H), 7.08 (t,  $J = 7.4$  Hz, 1H), 6.92 (d,  $J = 7.0$  Hz, 2H), 6.81 (d,  $J = 7.5$  Hz, 1H), 5.45 (d,  $J = 15.0$  Hz, 1H), 5.16 (d,  $J = 15.0$  Hz, 1H), 2.58-2.53 (m, 1H), 2.49-2.44 (m, 1H), 2.32 (s, 3H), 1.64-1.58 (m, 2H), 0.86 (t,  $J = 7.4$  Hz, 3H).  $^{13}\text{C}$  NMR (151 MHz,  $\text{CDCl}_3$ )  $\delta$  146.76, 140.50, 135.04, 132.38, 131.29, 130.30, 128.41 (2C), 127.99 (2C), 127.97, 125.40, 124.73, 124.51, 52.60, 27.22, 22.43, 15.08, 13.94. HRMS (ESI,  $m/z$ ): calcd. for  $\text{C}_{19}\text{H}_{22}\text{N}_3\text{S}^+ [\text{M}+\text{H}]^+$ : 324.1529, found: 324.1531.

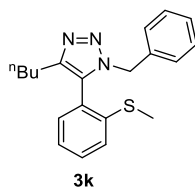

**1-benzyl-4-butyl-5-(2-(methylthio)phenyl)-1H-1,2,3-triazole**,  $^1\text{H}$  NMR (400 MHz,  $\text{CDCl}_3$ )  $\delta$  7.43-7.39 (m, 1H), 7.24-7.08 (m, 5H), 6.94-6.91 (m, 2H), 6.81 (dd,  $J = 7.6, 1.5$  Hz, 1H), 5.45 (d,  $J = 15.0$  Hz, 1H), 5.16 (d,  $J = 15.0$  Hz, 1H), 2.61-2.44 (m, 2H), 2.32 (s, 3H), 1.61-1.53 (m, 2H), 1.27 (q,  $J = 7.4$  Hz, 2H), 0.81 (t,  $J = 7.3$  Hz, 3H).  $^{13}\text{C}$  NMR (101 MHz,  $\text{CDCl}_3$ )  $\delta$  147.01, 140.49, 135.19, 132.20, 131.28, 130.20, 128.37 (2C), 127.95 (2C), 127.89, 125.70, 124.84, 124.51, 52.50, 31.20, 24.95, 22.36, 15.11, 13.73. HRMS (ESI,  $m/z$ ): calcd. for  $\text{C}_{20}\text{H}_{24}\text{N}_3\text{S}^+ [\text{M}+\text{H}]^+$ : 338.1685, found: 338.1687.

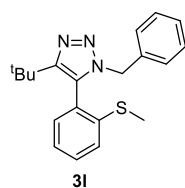

**1-benzyl-4-(tert-butyl)-5-(2-(methylthio)phenyl)-1H-1,2,3-triazole**,  $^1\text{H}$  NMR (400 MHz,  $\text{CDCl}_3$ )  $\delta$  7.40 (td,  $J = 7.7, 1.5$  Hz, 1H), 7.21-7.16 (m, 4H), 7.01 (td,  $J = 7.5, 1.1$  Hz, 1H), 6.92-6.90 (m, 2H), 6.75 (dd,  $J = 7.6, 1.5$  Hz, 1H), 5.40 (d,  $J = 14.9$  Hz, 1H), 4.92 (d,  $J = 14.9$  Hz, 1H), 2.35 (s, 3H), 1.22 (s, 9H).  $^{13}\text{C}$  NMR (101 MHz,  $\text{CDCl}_3$ )  $\delta$  153.85, 140.74, 135.22, 132.08, 130.42, 130.08, 128.30 (2C), 128.08 (2C), 127.84, 127.01, 123.95 (2C), 52.17, 31.95, 30.31 (3C), 14.75. HRMS (ESI,  $m/z$ ): calcd. for  $\text{C}_{20}\text{H}_{24}\text{N}_3\text{S}^+ [\text{M}+\text{H}]^+$ : 338.1685, found: 338.1686.

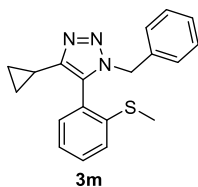

**1-benzyl-4-cyclopropyl-5-(2-(methylthio)phenyl)-1H-1,2,3-triazole**,  $^1\text{H}$  NMR (400 MHz,  $\text{CDCl}_3$ )  $\delta$  7.43 (td,  $J = 7.7, 1.5$  Hz, 1H), 7.28(d,  $J = 8.0, 1.2$  Hz, 1H), 7.20-7.07 (m, 4H), 6.92 (m, 3H), 5.44 (d,  $J = 14.9$  Hz, 1H), 5.16 (d,  $J = 14.9$  Hz, 1H), 2.32 (s, 3H), 1.66-1.61 (m, 1H), 0.98-0.92 (m, 2H), 0.82-0.77 (m, 2H).  $^{13}\text{C}$  NMR (101 MHz,  $\text{CDCl}_3$ )  $\delta$  147.88, 140.56, 135.15, 132.14, 131.45, 130.26, 128.37 (2C), 127.95 (2C), 127.90, 125.75, 125.19, 124.63, 52.44, 15.28, 7.14, 7.05, 6.42. HRMS (ESI,  $m/z$ ): calcd. for  $\text{C}_{19}\text{H}_{20}\text{N}_3\text{S}^+ [\text{M}+\text{H}]^+$ : 322.1372, found: 322.1376.

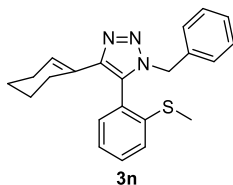

**1-benzyl-4-(cyclohex-1-en-1-yl)-5-(2-(methylthio)phenyl)-1H-1,2,3-triazole**,  $^1\text{H}$  NMR (400 MHz,  $\text{CDCl}_3$ )  $\delta$  7.44-7.37 (m, 1H), 7.27 (t,  $J = 6.9$  Hz, 1H), 7.22-7.15 (m, 3H), 7.08 (td,  $J = 7.5, 1.1$  Hz, 1H), 6.95-6.91 (m, 2H), 6.83 (dd,  $J = 7.6, 1.4$  Hz, 1H), 6.04-6.00 (m, 1H), 5.45 (d,  $J = 14.9$  Hz, 1H), 5.10 (d,  $J = 14.9$  Hz, 1H), 2.32 (s, 3H), 2.31-2.26 (m, 2H), 2.06-2.00 (m, 2H), 1.67-1.53 (m, 4H).  $^{13}\text{C}$  NMR (101 MHz,  $\text{CDCl}_3$ )

$\delta$ 147.04, 140.40, 135.14, 131.32, 130.16, 128.35, 128.25 (2C), 127.95 (2C), 127.90, 126.00, 125.00, 124.63, 52.26, 26.30, 25.46, 22.62, 22.00, 15.16. HRMS (ESI,  $m/z$ ): cacl. for  $C_{20}H_{24}N_3S^+ [M+H]^+$ : 362.1685, found: 362.1691.

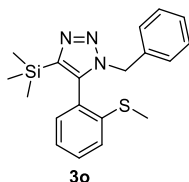

**1-benzyl-5-(2-(methylthio)phenyl)-4-(trimethylsilyl)-1H-1,2,3-triazole**,  $^1H$  NMR (400 MHz,  $CDCl_3$ )  $\delta$  7.45-7.41 (m, 1H), 7.28-7.16 (m, 4H), 7.08 (td,  $J = 7.5, 1.2$  Hz, 1H), 7.00-6.94 (m, 2H), 6.80 (dd,  $J = 7.5, 1.5$  Hz, 1H), 5.53 (d,  $J = 14.9$  Hz, 1H), 5.11 (d,  $J = 14.9$  Hz, 1H), 2.36 (s, 3H), 0.13 (s, 9H).  $^{13}C$  NMR (101 MHz,  $CDCl_3$ )  $\delta$  145.56, 141.04, 140.35, 135.22, 131.41, 130.22, 128.35 (2C), 128.10 (2C), 127.88, 126.70, 124.37, 124.12, 51.84, 14.97, -1.24 (3C). HRMS (ESI,  $m/z$ ): cacl. for  $C_{19}H_{24}N_3SiS^+ [M+H]^+$ : 354.1455, found: 354.1458.

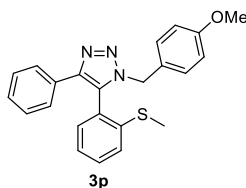

**1-(4-methoxybenzyl)-5-(2-(methylthio)phenyl)-4-phenyl-1H-1,2,3-triazole**,  $^1H$  NMR (400 MHz,  $CDCl_3$ )  $\delta$  7.60-7.57 (m, 2H), 7.49 (td,  $J = 7.7, 1.5$  Hz, 1H), 7.34-7.22 (m, 4H), 7.15 (td,  $J = 7.5, 1.1$  Hz, 1H), 6.95-6.91 (m, 3H), 6.75-6.72 (m, 2H), 5.46 (d,  $J = 14.8$  Hz, 1H), 5.13 (d,  $J = 14.8$  Hz, 1H), 3.75 (s, 3H), 2.30 (s, 3H).  $^{13}C$  NMR (101 MHz,  $CDCl_3$ )  $\delta$  159.46, 145.03, 140.57, 131.48, 131.38, 131.10, 130.59, 129.57 (2C), 128.44 (2C), 127.66, 127.09, 126.20, 126.17 (2C), 125.33, 125.00, 113.84 (2C), 55.28, 52.03, 15.14. HRMS (ESI,  $m/z$ ): cacl. for  $C_{23}H_{22}N_3OS^+ [M+H]^+$ : 388.1478, found: 388.1483.

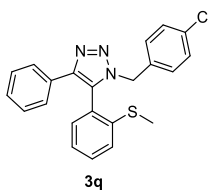

**1-(4-chlorobenzyl)-5-(2-(methylthio)phenyl)-4-phenyl-1H-1,2,3-triazole**,  $^1\text{H}$  NMR (400 MHz,  $\text{CDCl}_3$ )  $\delta$  7.57 (dd,  $J = 7.9, 1.7$  Hz, 2H), 7.50 (td,  $J = 7.9, 1.4$  Hz, 1H), 7.32-7.23 (m, 4H), 7.19-7.13 (m, 3H), 6.93-6.90 (m, 3H), 5.45 (d,  $J = 15.0$  Hz, 1H), 5.19 (d,  $J = 15.0$  Hz, 1H), 2.30 (s, 3H).  $^{13}\text{C}$  NMR (101 MHz,  $\text{CDCl}_3$ )  $\delta$  145.23, 140.63, 134.11, 133.35, 131.54, 131.21, 130.86, 130.70, 129.52 (2C), 128.63 (2C), 128.47 (2C), 127.79, 126.15 (2C), 125.87, 125.26, 125.04, 51.78, 15.06. HRMS (ESI,  $m/z$ ): cacl. for  $\text{C}_{22}\text{H}_{19}\text{ClN}_3\text{S}^+ [\text{M}+\text{H}]^+$ : 392.0983, found: 392.0984.

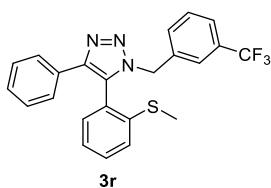

**5-(2-(methylthio)phenyl)-4-phenyl-1-(3-(trifluoromethyl)benzyl)-1H-1,2,3-triazole**,  $^1\text{H}$  NMR (400 MHz,  $\text{CDCl}_3$ )  $\delta$  7.62-7.56 (m, 2H), 7.53-7.48 (m, 2H), 7.39-7.24 (m, 6H), 7.17-7.11 (m, 2H), 6.91 (dd,  $J = 7.5, 1.2$  Hz, 1H), 5.52 (d,  $J = 15.0$  Hz, 1H), 5.32 (d,  $J = 15.0$  Hz, 1H), 2.28 (s, 3H).  $^{13}\text{C}$  NMR (101 MHz,  $\text{CDCl}_3$ )  $\delta$  145.32, 140.59, 135.68, 131.72, 131.57, 131.09, 130.95, 130.83, 130.78, 130.63, 129.12, 128.48 (2C), 127.85, 126.15 (2C), 125.63, 125.18, 125.15, 125.11, 125.03 (q,  $J = 3.4$  Hz), 52.04, 14.89.  $^{19}\text{F}$  NMR (376 MHz,  $\text{CDCl}_3$ )  $\delta$  -62.72. HRMS (ESI,  $m/z$ ): cacl. for  $\text{C}_{23}\text{H}_{19}\text{F}_3\text{N}_3\text{S}^+ [\text{M}+\text{H}]^+$ : 426.1246, found: 426.1250.

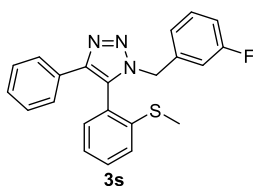

**1-(3-fluorobenzyl)-5-(2-(methylthio)phenyl)-4-phenyl-1H-1,2,3-triazole**,  $^1\text{H}$  NMR (400 MHz,  $\text{CDCl}_3$ )  $\delta$  7.6-7.59 (m, 2H), 7.52-7.47 (m, 1H), 7.33-7.24 (m, 4H), 7.19 - 7.13 (m, 2H), 6.96-6.90 (m, 2H), 6.80 (dt,  $J = 7.7, 1.3$  Hz, 1H), 6.70 (dt,  $J = 9.4, 2.1$  Hz, 1H), 5.49 (d,  $J = 15.1$  Hz, 1H), 5.21 (d,  $J = 15.1$  Hz, 1H), 2.30 (s, 1H).  $^{13}\text{C}$  NMR (101 MHz,  $\text{CDCl}_3$ )  $\delta$  162.65 (d,  $J = 246.7$  Hz), 145.20, 140.57, 137.27 (d,  $J = 7.4$  Hz), 131.69, 131.19, 130.91, 130.78, 130.08 (d,  $J = 8.2$  Hz), 128.49 (2C), 127.81, 126.17 (2C), 125.77, 125.33, 125.07, 123.70 (d,  $J = 3.1$  Hz), 115.19 (d,  $J = 2.5$  Hz), 114.98 (d,  $J =$

1.5 Hz), 51.86 (d,  $J = 2.0$  Hz), 15.06.  $^{19}\text{F}$  NMR (376 MHz,  $\text{CDCl}_3$ )  $\delta$  -112.57. HRMS (ESI,  $m/z$ ): cacl. for  $\text{C}_{22}\text{H}_{19}\text{N}_3\text{SF}^+$   $[\text{M}+\text{H}]^+$ : 376.1278, found: 376.1278.

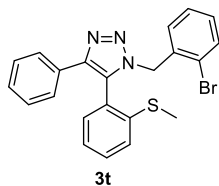

**1-(2-bromobenzyl)-5-(2-(methylthio)phenyl)-4-phenyl-1H-1,2,3-triazole**,  $^1\text{H}$  NMR (400 MHz,  $\text{CDCl}_3$ )  $\delta$  7.64-7.58 (m, 2H), 7.48-7.32 (m, 2H), 7.33-7.19 m, 5H), 7.120 (t,  $J = 7.5$  Hz, 2H), 7.01-6.98 (m, 1H), 6.91 (dd,  $J = 7.6, 1.5$  Hz, 1H), 5.63 (d,  $J = 15.8$  Hz, 1H), 5.43 (d,  $J = 15.8$  Hz, 1H), 2.33 (s, 3H).  $^{13}\text{C}$  NMR (101 MHz,  $\text{CDCl}_3$ )  $\delta$  145.15, 140.54, 134.60, 132.55, 132.09, 131.03, 130.94, 130.66, 129.53, 129.43, 128.48 (2C), 127.78, 127.62, 126.18 (2C), 125.81, 125.63, 125.18, 122.81, 51.83, 15.28. HRMS (ESI,  $m/z$ ): cacl. for  $\text{C}_{22}\text{H}_{19}\text{BrN}_3\text{S}^+$   $[\text{M}+\text{H}]^+$ : 436.0478, found: 436.0481.

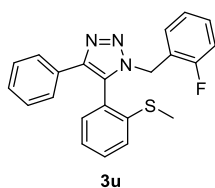

**1-(2-fluorobenzyl)-5-(2-(methylthio)phenyl)-4-phenyl-1H-1,2,3-triazole**,  $^1\text{H}$  NMR (400 MHz,  $\text{CDCl}_3$ )  $\delta$  7.61–7.59 (m, 2H), 7.48 (td,  $J = 7.8, 1.5$  Hz, 1H), 7.33-7.20 (m, 5H), 7.15-7.00 (m, 3H), 6.95-6.89 (m, 2H), 5.50 (d,  $J = 15.3$  Hz, 1H), 5.36 (d,  $J = 15.3$  Hz, 1H), 2.32 (s, 3H).  $^{13}\text{C}$  NMR (101 MHz,  $\text{CDCl}_3$ )  $\delta$  160.20 (d,  $J = 248.4$  Hz), 145.05, 140.56, 131.85, 131.05, 130.98, 130.64, 130.18 (d,  $J = 3.3$  Hz), 129.97 (d,  $J = 8.1$  Hz), 128.46 (2C), 127.74, 126.19 (2C), 125.82, 125.39, 125.09, 124.24 (d,  $J = 3.9$  Hz), 122.23 (d,  $J = 14.3$  Hz), 115.20 (d,  $J = 21.4$  Hz), 45.57 (d,  $J = 4.8$  Hz), 15.16.  $^{19}\text{F}$  NMR (376 MHz,  $\text{CDCl}_3$ )  $\delta$  -118.26. HRMS (ESI,  $m/z$ ): cacl. for  $\text{C}_{22}\text{H}_{19}\text{N}_3\text{SF}^+$   $[\text{M}+\text{H}]^+$ : 376.1278, found: 376.1278.

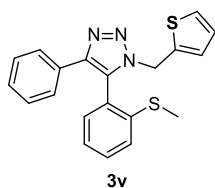

**5-(2-(methylthio)phenyl)-4-phenyl-1-(thiophen-2-ylmethyl)-1H-1,2,3-triazole**,  $^1\text{H}$  NMR (400 MHz,  $\text{CDCl}_3$ )  $\delta$  7.61-7.50 (m, 3H), 7.36 (d,  $J = 8.0, 1.2$  Hz, 1H), 7.29-7.18 (m, 5H), 7.03 (dd,  $J = 7.5, 1.5$  Hz, 1H), 6.86-6.84 (m, 1H), 6.70 (dd,  $J = 3.5, 1.1$  Hz, 1H), 5.68(d,  $J = 15.4$  Hz, 1H), 5.38 (d,  $J = 15.4$  Hz, 1H), 2.35 (s, 3H).  $^{13}\text{C}$  NMR (101 MHz,  $\text{CDCl}_3$ )  $\delta$  145.02, 140.57, 136.79, 131.42, 131.34, 130.94, 130.72, 128.45 (2C), 127.74, 127.66, 126.75, 126.36, 126.23 (2C), 125.90, 125.37, 125.15, 46.87, 15.16. HRMS (ESI, m/z): cacl. for  $\text{C}_{20}\text{H}_{18}\text{N}_3\text{S}_2^+$   $[\text{M}+\text{H}]^+$ : 364.0937, found: 364.0941.

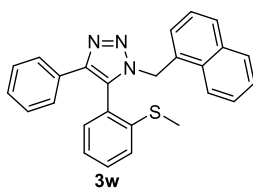

**5-(2-(methylthio)phenyl)-1-(naphthalen-1-ylmethyl)-4-phenyl-1H-1,2,3-triazole**,  $^1\text{H}$  NMR (400 MHz,  $\text{CDCl}_3$ )  $\delta$  8.13-8.08 (m, 1H), 7.84-7.80 (m, 1H), 7.74 (d,  $J = 8.3$  Hz, 1H), 7.59-7.56 (m, 2H), 7.51-7.40 (m, 3H), 7.29-7.17 (m, 5H), 7.01 (td,  $J = 7.5, 1.2$  Hz, 1H), 6.81-6.76 (m, 2H), 6.06 (d,  $J = 15.2$  Hz, 1H), 5.75 (d,  $J = 15.2$  Hz, 1H), 2.25 (s, 3H).  $^{13}\text{C}$  NMR (101 MHz,  $\text{CDCl}_3$ )  $\delta$  145.11, 140.51, 133.59, 132.02, 131.22, 131.10, 131.02, 130.47, 130.20, 128.98, 128.57, 128.42 (2C), 127.67, 127.35, 126.71, 126.26, 126.17 (2C), 125.87, 125.26, 124.98, 124.91, 123.25, 50.91, 15.06. HRMS (ESI, m/z): cacl. for  $\text{C}_{26}\text{H}_{22}\text{N}_3\text{S}^+$   $[\text{M}+\text{H}]^+$ : 408.1529, found: 408.1528.

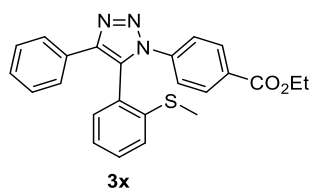

**Ethyl 4-(5-(2-(methylthio)phenyl)-4-phenyl-1H-1,2,3-triazol-1-yl)benzoate**,  $^1\text{H}$  NMR (400 MHz,  $\text{CDCl}_3$ )  $\delta$  8.07-8.02 (m, 2H), 7.64-7.61 (m, 2H), 7.51-7.46 (m, 3H), 7.33-7.28 (m, 4H), 7.22-7.19 (m, 2H), 4.38 (q,  $J = 7.1$  Hz, 2H), 2.28 (s, 3H), 1.40 (t,  $J = 7.1$  Hz, 3H).  $^{13}\text{C}$  NMR (101 MHz,  $\text{CDCl}_3$ )  $\delta$  165.56, 145.64, 140.65, 140.14, 131.69, 131.27, 130.79, 130.62, 130.55, 130.42 (2C), 128.53 (2C), 128.05, 126.54 (2C), 126.34, 125.92, 125.42, 123.89 (2C), 61.33, 15.32, 14.27. HRMS (ESI, m/z): cacl. for  $\text{C}_{24}\text{H}_{22}\text{O}_2\text{N}_3\text{S}^+$   $[\text{M}+\text{H}]^+$ : 416.1427, found: 416.1430.

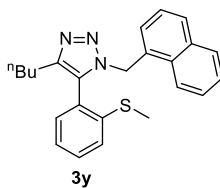

**4-butyl-5-(2-(methylthio)phenyl)-1-(naphthalen-1-ylmethyl)-1H-1,2,3-triazole**,  $^1\text{H}$  NMR (400 MHz,  $\text{CDCl}_3$ )  $\delta$  8.05-8.00 (m,  $J = 7.2, 3.5$  Hz, 1H), 7.83–7.78 (m, 1H), 7.71 (d,  $J = 8.3$  Hz, 1H), 7.48-7.43 (m,  $J = 6.4, 3.5$  Hz, 2H), 7.36 (td,  $J = 7.7, 1.5$  Hz, 1H), 7.20-7.14 (m, 2H), 6.99 (td,  $J = 7.5, 1.2$  Hz, 1H), 6.76-6.68 (m, 2H), 6.00 (d,  $J = 15.2$  Hz, 1H), 5.73 (d,  $J = 15.2$  Hz, 1H), 2.60-2.44 (m, 2H), 2.28 (s, 3H), 1.64-1.53 (m, 2H), 1.33-1.24 (m, 2H), 0.83 (t,  $J = 7.3$  Hz, 3H).  $^{13}\text{C}$  NMR (101 MHz,  $\text{CDCl}_3$ )  $\delta$  147.12, 140.44, 133.53, 131.17, 130.99, 130.45, 130.08, 128.78, 128.49, 127.13, 126.59, 125.79, 124.87, 124.71, 124.45, 123.22, 50.86, 31.19, 24.86, 22.34, 15.01, 13.73. HRMS (ESI,  $m/z$ ): cacl. for  $\text{C}_{24}\text{H}_{26}\text{N}_3\text{S}^+ [\text{M}+\text{H}]^+$ : 388.1842, found: 388.1842.

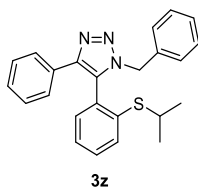

**1-benzyl-5-(2-(isopropylthio)phenyl)-4-phenyl-1H-1,2,3-triazole**,  $^1\text{H}$  NMR (400 MHz,  $\text{CDCl}_3$ )  $\delta$  7.61-7.58 (m, 2H), 7.52-7.43 (m, 2H), 7.28-7.18 (m, 6H), 7.12 (td,  $J = 7.4, 1.4$  Hz, 1H), 7.02-7.00 (m, 2H), 6.87 (dd,  $J = 7.6, 1.4$  Hz, 1H), 5.62 (d,  $J = 15.0$  Hz, 1H), 5.14 (d,  $J = 15.0$  Hz, 1H), 3.36 (p,  $J = 6.7$  Hz, 1H), 1.23 (d,  $J = 6.6$  Hz, 3H), 1.16 (d,  $J = 6.6$  Hz, 3H).  $^{13}\text{C}$  NMR (101 MHz,  $\text{CDCl}_3$ )  $\delta$  144.81, 138.44, 135.09, 132.26, 131.89, 131.17, 130.36, 129.44, 128.51 (2C), 128.39 (2C), 128.24, 128.07, 127.97 (2C), 127.60, 126.27 (2C), 125.98, 52.49, 36.54, 22.97, 22.60. HRMS (ESI,  $m/z$ ): cacl. for  $\text{C}_{24}\text{H}_{24}\text{N}_3\text{S}^+ [\text{M}+\text{H}]^+$ : 386.1685, found: 386.1688.

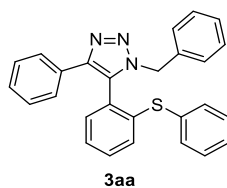

**1-benzyl-4-phenyl-5-(2-(phenylthio)phenyl)-1H-1,2,3-triazole**,  $^1\text{H}$  NMR (400 MHz,  $\text{CDCl}_3$ )  $\delta$  7.59-7.55 (m, 2H), 7.38-7.15 (m, 14H), 7.06-7.02 (m, 2H), 6.94 (dd,  $J = 7.6,$



1.1 Hz, 2H), 5.54 (d,  $J = 15.0$  Hz, 1H), 5.18 (d,  $J = 15.0$  Hz, 1H).  $^{13}\text{C}$  NMR (101 MHz,  $\text{CDCl}_3$ )  $\delta$  145.06, 139.67, 135.05, 133.65 (2C), 132.41, 131.81, 131.79, 131.06, 130.54, 129.95, 129.43 (2C), 128.59 (2C), 128.49, 128.38 (2C), 128.13, 127.93 (2C), 127.68, 126.57, 126.26 (2C), 52.41. HRMS (ESI,  $m/z$ ): cacl. for  $\text{C}_{27}\text{H}_{22}\text{N}_3\text{S}^+$   $[\text{M}+\text{H}]^+$ : 420.1529, found: 420.1531.

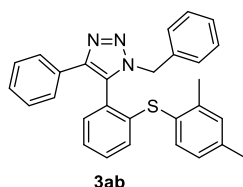

**1-benzyl-5-(2-((2,4-dimethylphenyl)thio)phenyl)-4-phenyl-1H-1,2,3-triazole**,  $^1\text{H}$  NMR (400 MHz,  $\text{CDCl}_3$ )  $\delta$  7.65-7.61 (m, 2H), 7.31-7.24 (m, 7H), 7.17 (d,  $J = 7.8$  Hz, 1H), 7.12-7.06 (m, 4H), 6.98 (d,  $J = 7.8$  Hz, 1H), 6.92 (dd,  $J = 7.6, 1.5$  Hz, 1H), 6.83 (d,  $J = 7.6$  Hz, 1H), 5.60 (d,  $J = 14.9$  Hz, 1H), 5.25 (d,  $J = 14.9$  Hz, 1H), 2.33 (s, 3H), 2.15 (s, 3H).  $^{13}\text{C}$  NMR (101 MHz,  $\text{CDCl}_3$ )  $\delta$  144.96, 142.25, 140.43, 139.87, 136.17, 135.11, 131.83, 131.74, 131.68, 131.16, 130.47, 128.58 (2C), 128.34 (2C), 128.14, 128.03 (2C), 127.92, 127.66, 126.90, 126.44, 126.29 (2C), 125.72, 125.40, 52.43, 21.15, 20.43. HRMS (ESI,  $m/z$ ): cacl. for  $\text{C}_{29}\text{H}_{26}\text{N}_3\text{S}^+$   $[\text{M}+\text{H}]^+$ : 448.1842, found: 448.1846.

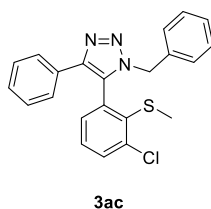

**1-benzyl-5-(3-chloro-2-(methylthio)phenyl)-4-phenyl-1H-1,2,3-triazole**,  $^1\text{H}$  NMR (400 MHz,  $\text{CDCl}_3$ )  $\delta$  7.61 (dd,  $J = 8.1, 1.4$  Hz, 1H), 7.53 (dd,  $J = 8.0, 1.8$  Hz, 2H), 7.30 – 7.19 (m, 7H), 6.98 – 6.95 (m, 3H), 5.52 (d,  $J = 15.0$  Hz, 1H), 5.25 (d,  $J = 15.0$  Hz, 1H), 1.93 (s, 3H).  $^{13}\text{C}$  NMR (101 MHz,  $\text{CDCl}_3$ )  $\delta$  144.72, 140.88, 136.50, 134.75, 134.54, 132.76, 131.90, 130.91, 130.13, 129.62, 128.67 (2C), 128.58 (2C), 128.28, 127.92 (2C), 127.87, 126.33 (2C), 52.70, 17.89. HRMS (ESI,  $m/z$ ): cacl. for  $\text{C}_{22}\text{H}_{19}\text{ClN}_3\text{S}^+$   $[\text{M}+\text{H}]^+$ : 392.0983, found: 392.0988.

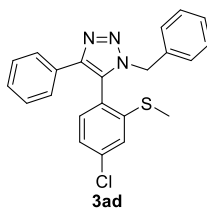

**1-benzyl-5-(4-chloro-2-(methylthio)phenyl)-4-phenyl-1H-1,2,3-triazole**  $^1\text{H}$  NMR (400 MHz,  $\text{CDCl}_3$ )  $\delta$  7.58 (d,  $J = 7.2$  Hz, 2H), 7.31-7.20 (m, 7H), 7.08 (d,  $J = 8.2$  Hz, 1H), 7.01 (d,  $J = 6.6$  Hz, 2H), 6.79 (d,  $J = 8.1$  Hz, 1H), 5.54 (d,  $J = 15.0$  Hz, 1H), 5.18 (d,  $J = 15.0$  Hz, 1H), 2.30 (s, 3H).  $^{13}\text{C}$  NMR (101 MHz,  $\text{CDCl}_3$ )  $\delta$  145.40, 142.97, 136.93, 134.79, 132.35, 130.75, 130.39, 128.58 (3C), 128.23, 127.97 (2C), 127.94 (2C), 126.14 (2C), 125.00, 124.59, 124.03, 52.60, 15.01. HRMS (ESI,  $m/z$ ): cacl. for  $\text{C}_{22}\text{H}_{19}\text{ClN}_3\text{S}^+ [\text{M}+\text{H}]^+$ : 392.0983, found: 392.0986.

## V. Synthetic transformations

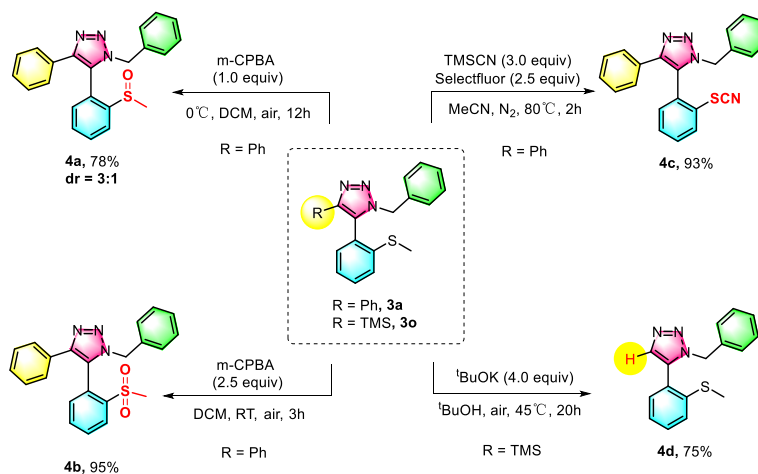

**Scheme S1.** Synthetic transformations of **3a** and **3o**

### Procedure for preparation of **4a-4d**

#### 1) Synthesis of **4a**.

To an oven-dried 10 mL flask was added **3a** (0.4 mmol), m-CPBA (85% wt) (1.0 equiv), DCM (3.0 mL). The reaction was allowed to stir at 0 °C under air for 1h. Then the reaction was quenched by saturated  $\text{NaHCO}_3$  solution (10 mL), extracted by DCM (3  $\times$  10 mL). The combined organic layers were dried over  $\text{Na}_2\text{SO}_4$ , filtered, concentrated,

and the residue was purified by silica gel column chromatography (petroleum ether/ethyl acetate = 1:1) to afford the product **4a**.

## 2) Synthesis of **4b**.

To an oven-dried 10 mL flask was added **3a** (0.4 mmol), m-CPBA (85% wt) (2.5 equiv), DCM (3.0 mL). The reaction was allowed to stir at RT under air for 2h. Then the reaction was quenched by saturated NaHCO<sub>3</sub> solution (20 mL), extracted by DCM (3 × 10 mL). The combined organic layers were dried over Na<sub>2</sub>SO<sub>4</sub>, filtered, concentrated, and the residue was purified by silica gel column chromatography (petroleum ether/ethyl acetate = 4:1) to afford the product **4b**.

## 3) Synthesis of **4c**.

To a reaction tube were sequentially added thioether **3a** (0.2 mmol), TMSCN (74.0 μL, 0.6 mmol, 3 equiv), Selectfluor reagent (177.0 mg, 0.5 mmol, 2.5 equiv). The tube was evacuated and backfilled with nitrogen for three times. Then, 1 mL of dry acetonitrile was added via a syringe, and the resulting solution was stirred in an 80 °C oil bath. When the reaction was completed (monitored by TLC), the solvent was removed by distillation under reduced pressure. The crude residue was purified by silica gel column chromatography (petroleum ether/ethyl acetate = 8:1) to afford the product **4c**.

## 4) Synthesis of **4d**.

To a <sup>t</sup>BuOH (3.0 ml) solution of **3o** (0.5 mmol) was added <sup>t</sup>BuOK (4.0 equiv) and the mixture was stirred at 45 °C for 20 h, then the mixture was diluted water (10.0 ml) and extracted 3 times with ether. The combined organic layers were dried over Na<sub>2</sub>SO<sub>4</sub>, filtered, concentrated, and the residue was purified by silica gel column chromatography (petroleum ether/ethyl acetate = 10:1) to afford the product **4d**.

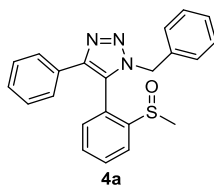

**1-benzyl-5-(2-(methylsulfinyl)phenyl)-4-phenyl-1H-1,2,3-triazole**,  $^1\text{H}$  NMR (400 MHz,  $\text{CDCl}_3$ )  $\delta$  8.12 (dd,  $J = 8.0, 1.3$  Hz, 1H), 7.78-7.73 (m, 1H), 7.49 (td,  $J = 7.5, 1.3$  Hz, 1H), 7.45-7.41 (m, 2H), 7.22-7.16 (m, 6H), 7.02 (dd,  $J = 7.6, 1.3$  Hz, 1H), 6.91 (m, 2H), 5.53 (d,  $J = 15.0$  Hz, 1H), 5.17 (d,  $J = 15.0$  Hz, 1H), 2.09 (s, 3H).  $^{13}\text{C}$  NMR (101 MHz,  $\text{CDCl}_3$ )  $\delta$  146.59, 146.01, 134.15, 131.86, 131.79, 131.53, 130.24, 129.01, 128.86 (2C), 128.79 (2C), 128.50, 128.42, 127.84 (2C), 126.22 (2C), 124.96, 124.62, 52.94, 42.51. HRMS (ESI,  $m/z$ ): cacl. for  $\text{C}_{22}\text{H}_{20}\text{N}_3\text{OS}^+ [\text{M}+\text{H}]^+$ : 374.1322, found: 374.1325.

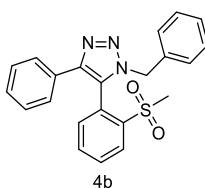

**1-benzyl-5-(2-(methylsulfonyl)phenyl)-4-phenyl-1H-1,2,3-triazole**,  $^1\text{H}$  NMR (400 MHz,  $\text{CDCl}_3$ )  $\delta$  8.30 (dd,  $J = 7.9, 1.3$  Hz, 1H), 7.74 (td,  $J = 7.8, 1.3$  Hz, 1H), 7.54 (td,  $J = 7.6, 1.4$  Hz, 1H), 7.50-7.46 (m, 2H), 7.29–7.18 (m, 6H), 6.99-6.93 (m, 3H), 5.78 (d,  $J = 15.3$  Hz, 1H), 5.16 (d,  $J = 15.3$  Hz, 1H), 2.56 (s, 3H).  $^{13}\text{C}$  NMR (101 MHz,  $\text{CDCl}_3$ )  $\delta$  144.52, 140.37, 134.91, 134.29, 133.70, 131.02, 130.53, 130.28, 129.61, 128.90 (2C), 128.64 (2C), 128.24, 128.22, 128.08 (2C), 127.54, 125.80 (2C), 53.35, 43.70. HRMS (ESI,  $m/z$ ): cacl. for  $\text{C}_{22}\text{H}_{20}\text{N}_3\text{O}_2\text{S}^+ [\text{M}+\text{H}]^+$ : 390.1271, found: 390.1274.

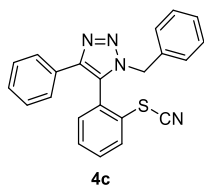

**1-benzyl-4-phenyl-5-(2-thiocyanatophenyl)-1H-1,2,3-triazole**,  $^1\text{H}$  NMR (400 MHz,  $\text{CDCl}_3$ )  $\delta$  7.75 (dd,  $J = 8.2, 1.2$  Hz, 1H), 7.64 (td,  $J = 7.8, 1.5$  Hz, 1H), 7.53-7.46 (m, 3H), 7.33-7.22 (m, 7H), 6.97-6.95 (m, 2H), 5.45-5.36 (m, 2H).  $^{13}\text{C}$  NMR (101 MHz,  $\text{CDCl}_3$ )  $\delta$  146.12, 134.05, 132.12, 131.95, 130.00 (2C), 129.83 (2C), 129.58, 129.23, 128.88, 128.82, 128.74, 128.47, 127.89 (3C), 127.70, 126.06 (2C), 108.98, 52.93. HRMS (ESI,  $m/z$ ): cacl. for  $\text{C}_{22}\text{H}_{17}\text{N}_4\text{S}^+ [\text{M}+\text{H}]^+$ : 369.1168, found: 369.1178.

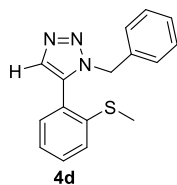

**1-benzyl-5-(2-(methylthio)phenyl)-1H-1,2,3-triazole**,  $^1\text{H}$  NMR (400 MHz,  $\text{CDCl}_3$ )  $\delta$  7.72 (s, 1H), 7.44 (t,  $J = 7.6$  Hz, 1H), 7.29 (d,  $J = 7.5$  Hz, 1H), 7.22 (d,  $J = 5.3$  Hz, 3H), 7.12 (t,  $J = 7.6$  Hz, 1H), 6.99 (d,  $J = 6.6$  Hz, 2H), 6.92 (d,  $J = 7.5$  Hz, 1H), 5.42 (s, 2H), 2.36 (d,  $J = 2.2$  Hz, 3H).  $^{13}\text{C}$  NMR (101 MHz,  $\text{CDCl}_3$ )  $\delta$  139.93, 135.48, 135.01, 134.43, 131.08, 130.44, 128.51 (2C), 128.08, 127.90 (2C), 125.30, 125.20, 124.63, 52.35, 15.38. HRMS (ESI,  $m/z$ ): cacl. for  $\text{C}_{16}\text{H}_{16}\text{N}_3\text{S}^+$   $[\text{M}+\text{H}]^+$ : 282.1059, found: 282.1065.

## VI. X-ray crystallographic data

Single crystal suitable for X-ray diffraction of compound **3y** was obtained from a solution of the compound **3y** in MeOH. The X-ray crystal structure is deposited in the Cambridge Crystallographic Data Center under reference number CCDC 2175071.

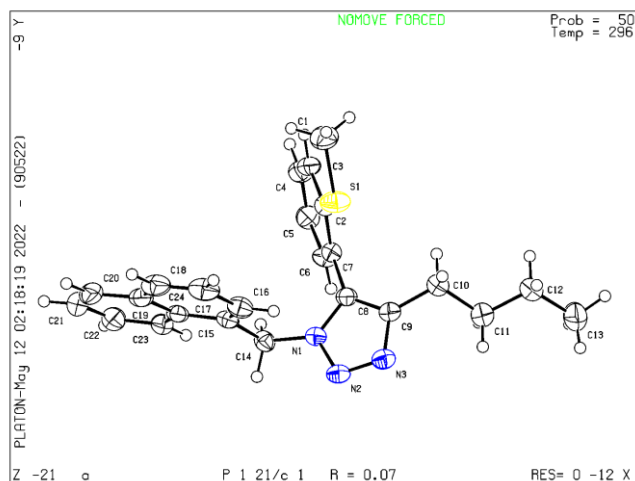

**Figure S1.** X-ray of **3y**

**Table S2.** Crystal data and structure refinement for **3y**.

|                     |                                                |
|---------------------|------------------------------------------------|
| Identification code | A                                              |
| Empirical formula   | $\text{C}_{24}\text{H}_{25}\text{N}_3\text{S}$ |
| Formula weight      | 387.53                                         |

|                                             |                                          |
|---------------------------------------------|------------------------------------------|
| Temperature/K                               | 296                                      |
| Crystal system                              | monoclinic                               |
| Space group                                 | P21/c                                    |
| a/Å                                         | 10.5924(10)                              |
| b/Å                                         | 12.6329(11)                              |
| c/Å                                         | 15.3842(17)                              |
| $\alpha$ /°                                 | 90                                       |
| $\beta$ /°                                  | 92.600(4)                                |
| $\gamma$ /°                                 | 90                                       |
| Volume/Å <sup>3</sup>                       | 2056.5(3)                                |
| Z                                           | 4                                        |
| $\rho$ calc/cm <sup>3</sup>                 | 1.252                                    |
| $\mu$ /mm <sup>-1</sup>                     | 0.172                                    |
| F(000)                                      | 824.0                                    |
| Crystal size/mm <sup>3</sup>                | 0.12 × 0.11 × 0.1                        |
| Radiation                                   | MoK $\alpha$ ( $\lambda$ = 0.71073)      |
| 2 $\theta$ range for data collection/°      | 4.174 to 61.798                          |
| Index ranges                                | -13 ≤ h ≤ 15, -18 ≤ k ≤ 18, -22 ≤ l ≤ 18 |
| Reflections collected                       | 23070                                    |
| Independent reflections                     | 6405 [Rint = 0.0729, Rsigma = 0.0684]    |
| Data/restraints/parameters                  | 6405/0/255                               |
| Goodness-of-fit on F <sup>2</sup>           | 1.033                                    |
| Final R indexes [I >= 2 $\sigma$ (I)]       | R1 = 0.0719, wR2 = 0.1808                |
| Final R indexes [all data]                  | R1 = 0.1071, wR2 = 0.2034                |
| Largest diff. peak/hole / e Å <sup>-3</sup> | 0.46/-0.43                               |

## VII. References

- [1] D. L. Reinhard, F. Heinen, J. Stoesser, E. Engelage and S. M. Huber, *Helv. Chim. Acta.*, 2021, **104**, e2000221.
- [2] T. Kesharwani, S. A. Worlikar and R. C. Larock, *J. Org. Chem.*, 2006, **71**, 2307.
- [3] S. Pramanik and P. Ghorai. *Org. Lett.*, 2014, **16**, 2104.

## VIII. NMR spectra

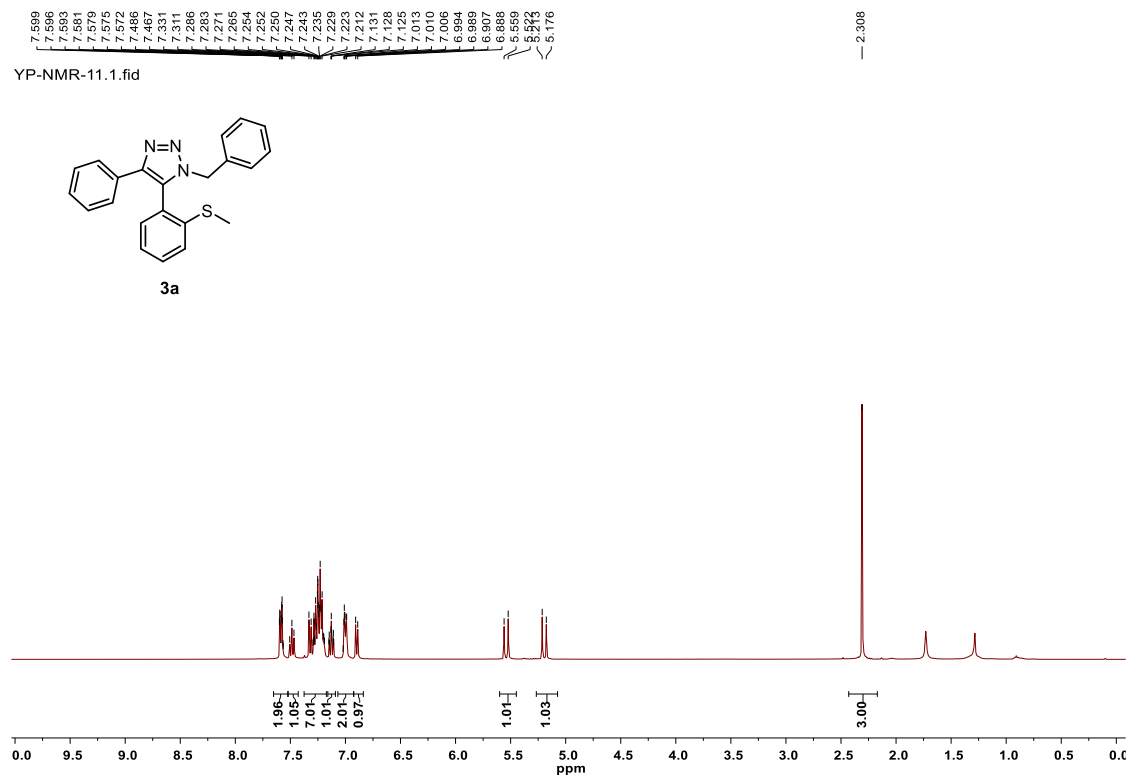

<sup>1</sup>H NMR spectrum of **3a** (400 MHz, CDCl<sub>3</sub>)

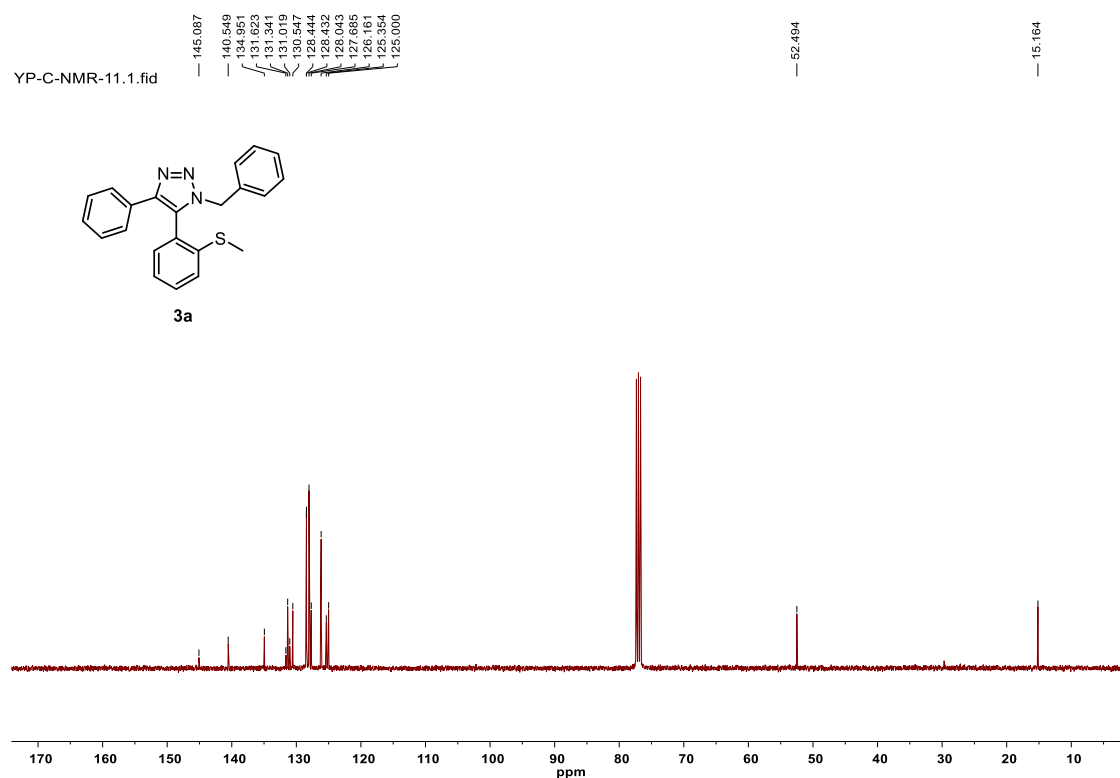

<sup>13</sup>C NMR spectrum of **3a** (101 MHz, CDCl<sub>3</sub>)



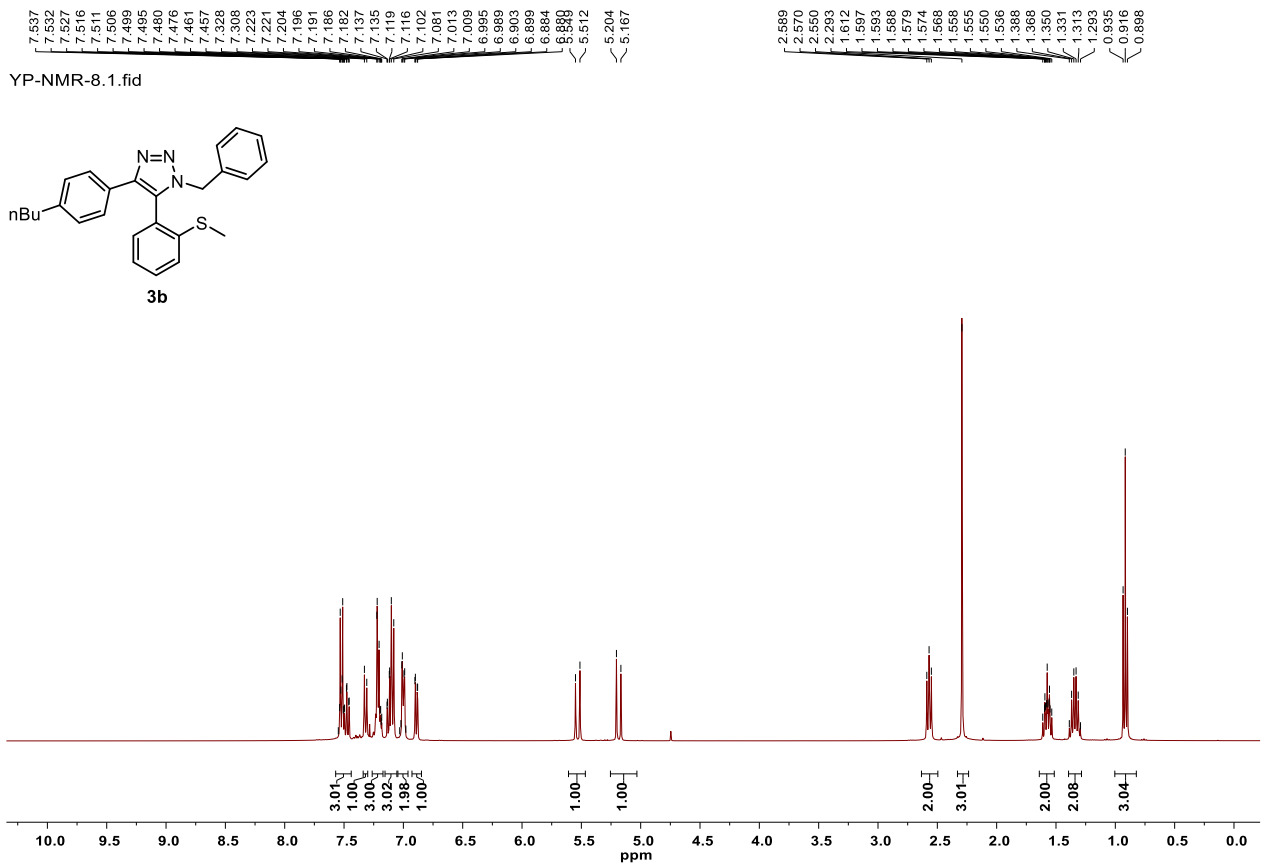

**<sup>1</sup>H NMR spectrum of 3b (400 MHz, CDCl<sub>3</sub>)**

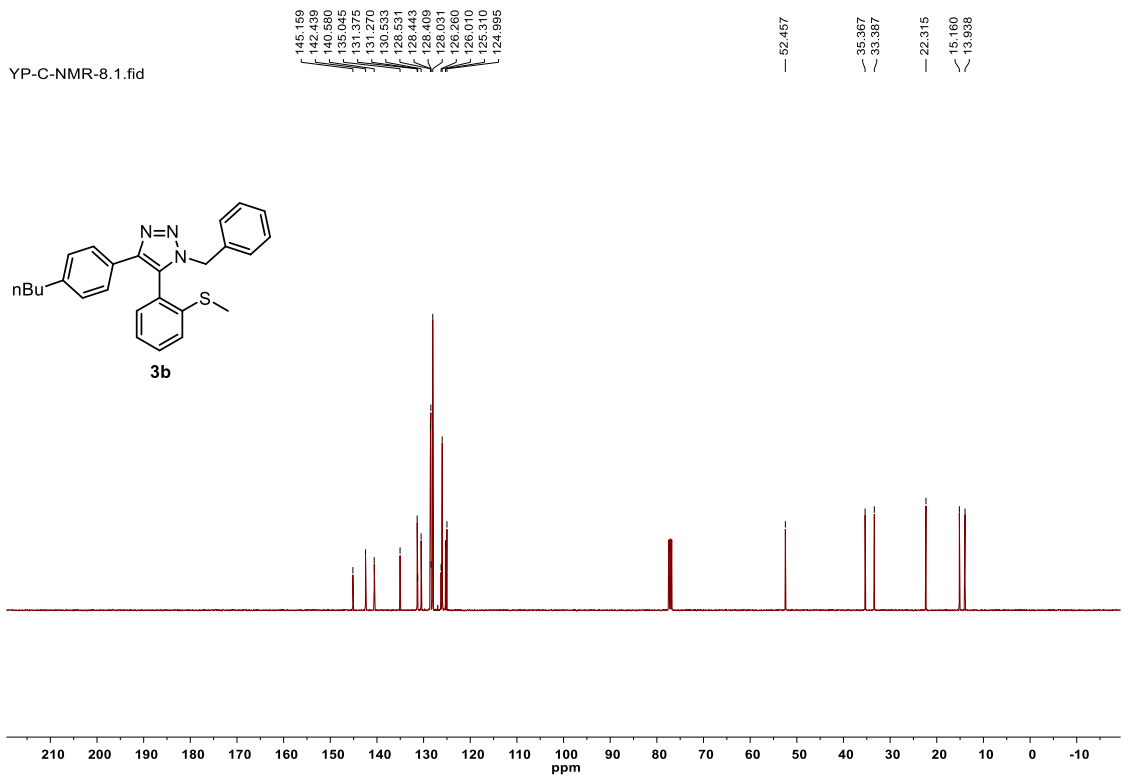

**<sup>13</sup>C NMR spectrum of 3b (101 MHz, CDCl<sub>3</sub>)**

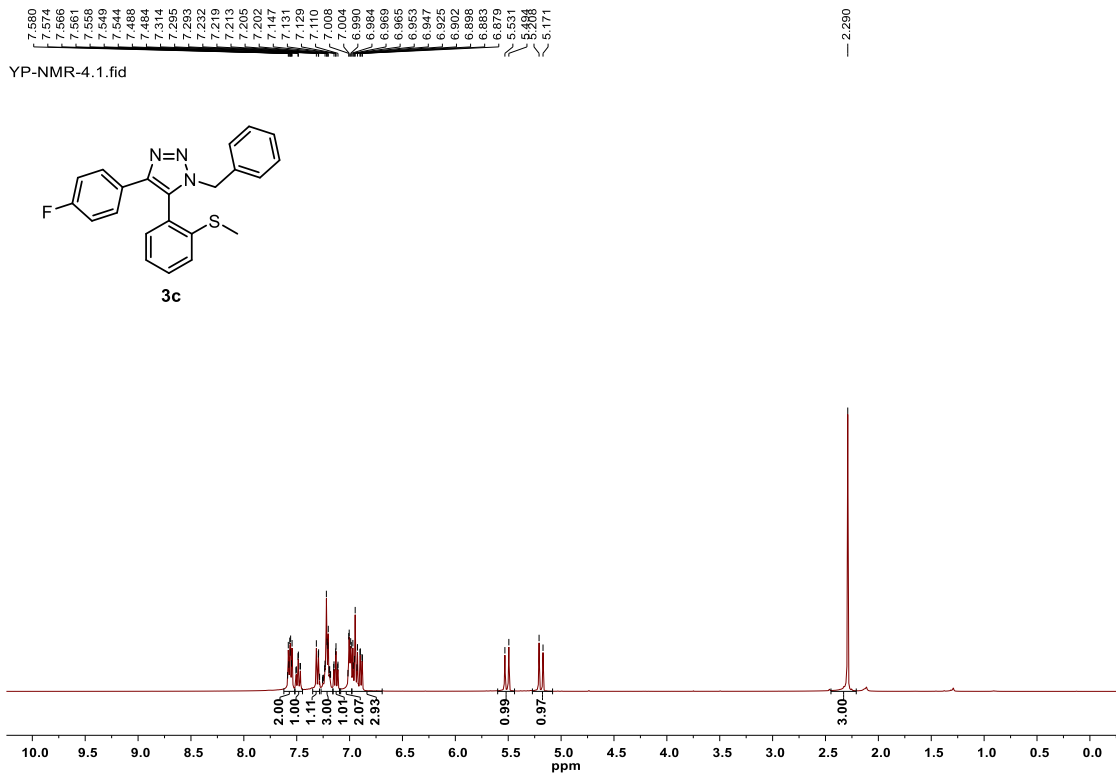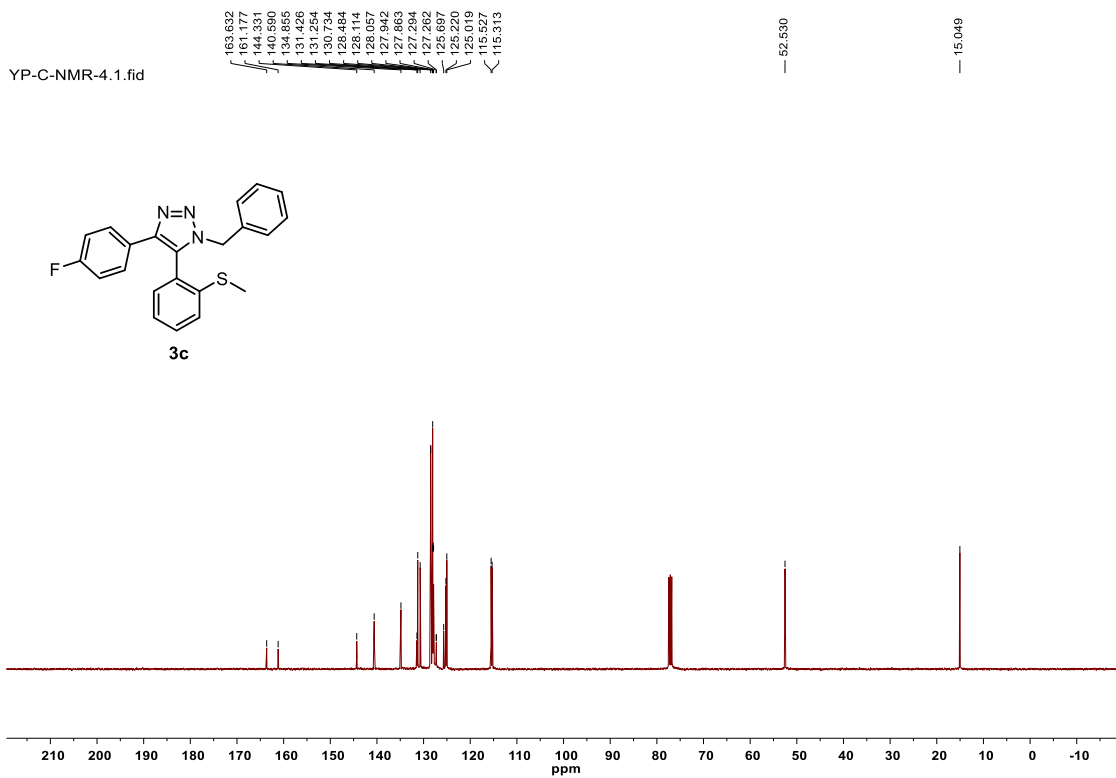

YP-4.2.fid

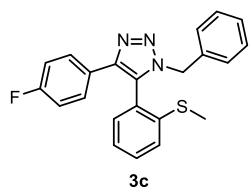

— -114.065

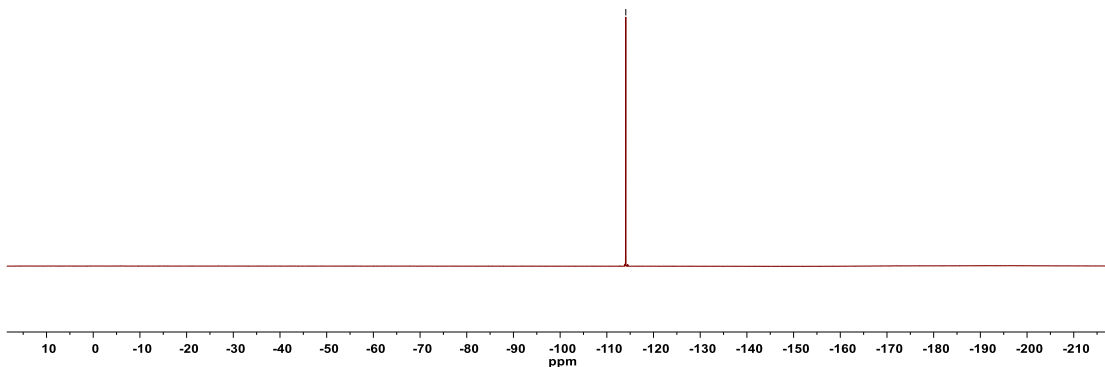

7.659  
7.654  
7.649  
7.638  
7.633  
7.630  
7.559  
7.554  
7.545  
7.541  
7.639  
7.633  
7.621  
7.597  
7.594  
7.501  
7.493  
7.485  
7.481  
7.465  
7.462  
7.415  
7.412  
7.403  
7.394  
7.390  
7.378  
7.375  
7.329  
7.326  
7.321  
7.316  
7.306  
7.304  
7.298  
7.298  
7.285  
7.282  
7.232  
7.228  
7.206  
7.206  
7.203  
7.199  
7.190  
7.185  
7.176  
7.172  
7.167  
7.156  
7.155  
7.147  
7.144  
7.137  
7.134  
7.128  
7.125  
7.110  
7.110  
7.103  
7.013  
7.005  
7.001  
6.996  
6.897  
6.891  
6.848  
6.844  
6.825  
6.825  
6.916  
6.912  
6.904  
6.897  
6.893  
5.850  
5.913  
5.845  
5.847  
5.847  
2.305

YP-NMR-14.1.fid

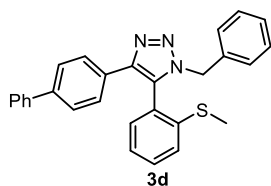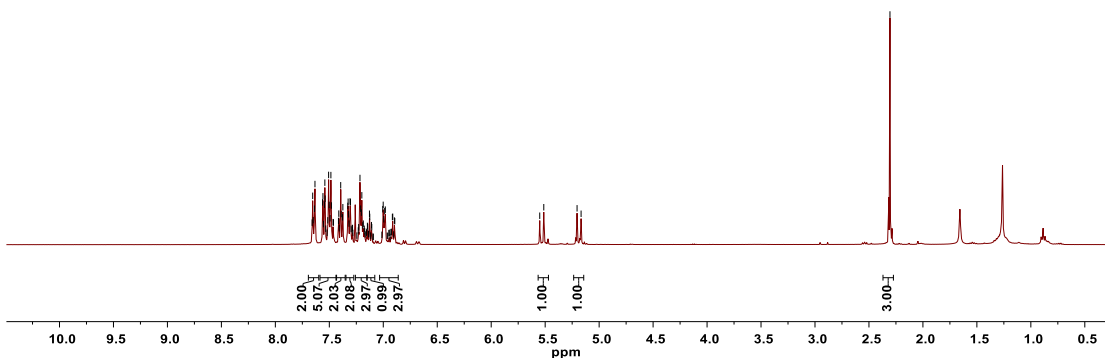

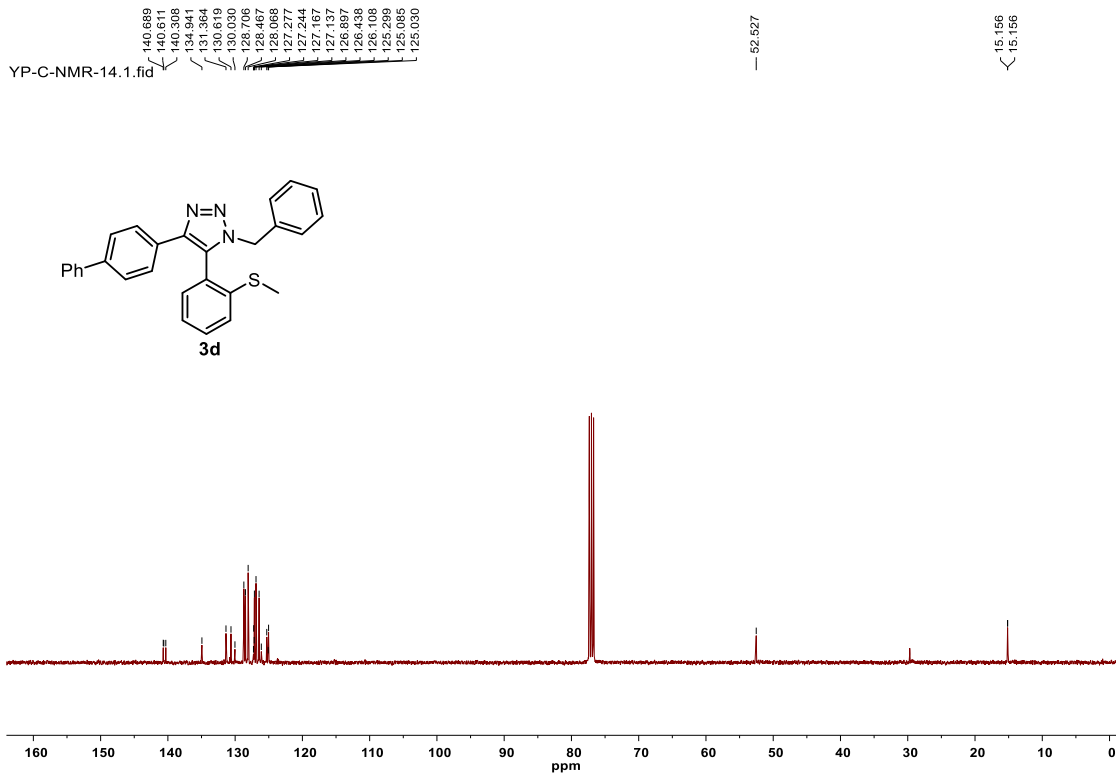

**$^{13}\text{C}$  NMR spectrum of 3d (101 MHz,  $\text{CDCl}_3$ )**

**$^1\text{H}$  NMR spectrum of 3e (400 MHz,  $\text{CDCl}_3$ )**

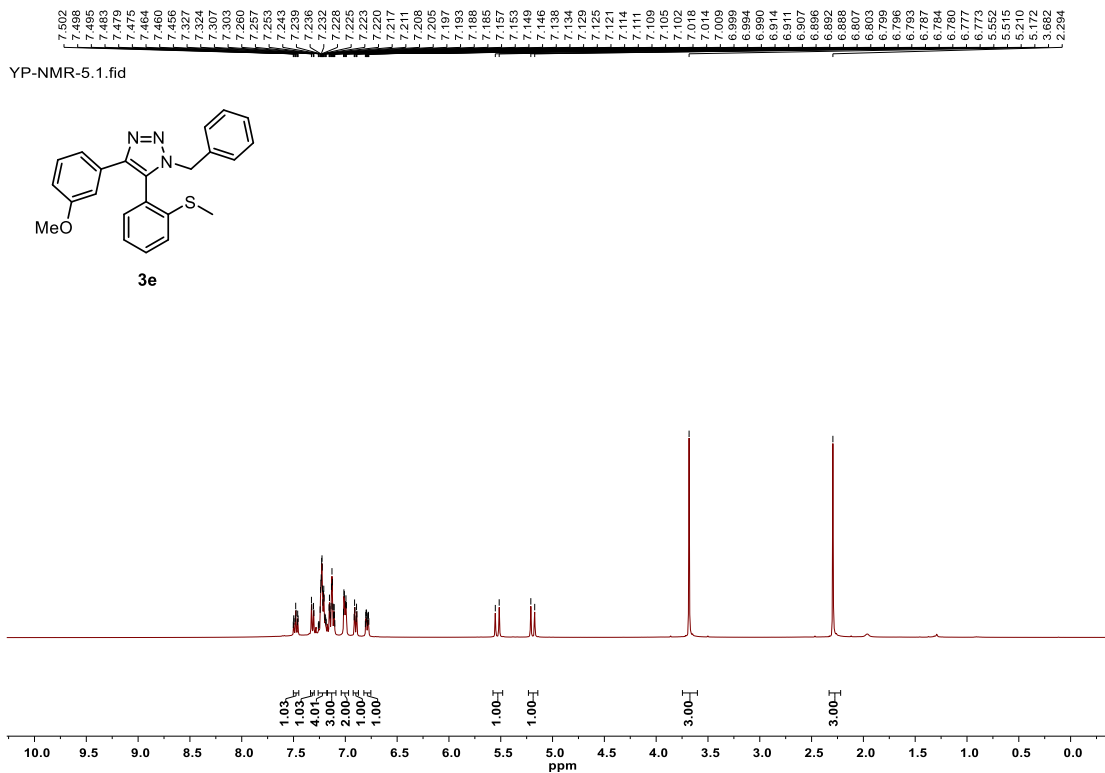

YP-C-NMR-5.1.fid

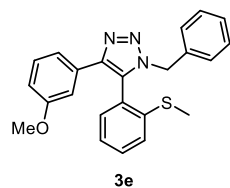

159.624  
144.824  
140.897  
134.932  
131.775  
131.775  
131.341  
130.605  
129.457  
128.462  
128.072  
128.045  
126.147  
125.870  
125.820  
118.500  
114.324  
110.841

55.037  
52.491

15.179

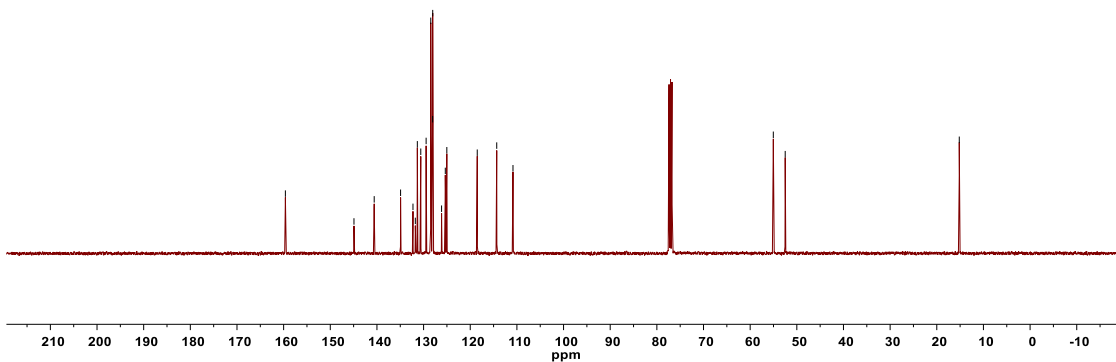

**<sup>13</sup>C NMR spectrum of 3e (101 MHz, CDCl<sub>3</sub>)**

7.692  
7.688  
7.683  
7.623  
7.564  
7.560  
7.500  
7.485  
7.481  
7.379  
7.375  
7.371  
7.361  
7.357  
7.353  
7.343  
7.333  
7.331  
7.322  
7.313  
7.310  
7.245  
7.245  
7.237  
7.234  
7.230  
7.225  
7.215  
7.211  
7.198  
7.194  
7.189  
7.186  
7.176  
7.167  
7.164  
7.157  
7.148  
7.145  
7.139  
7.136  
7.126  
7.126  
7.017  
7.009  
7.005  
6.991  
6.985  
6.985  
6.904  
6.890  
6.889  
6.881  
5.543  
5.506  
5.216  
5.179

2.306

YP-H-NMR-0614-5.1.fid

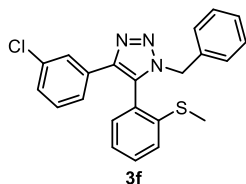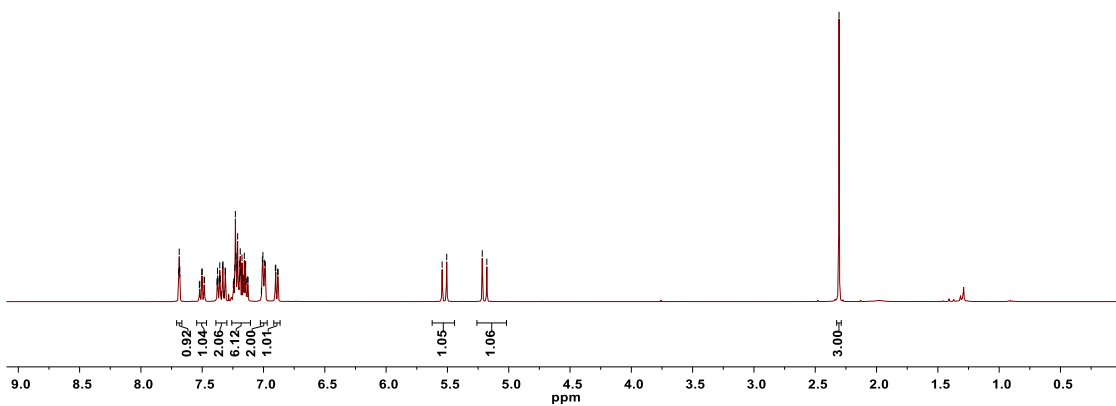

**<sup>1</sup>H NMR spectrum of 3f (400 MHz, CDCl<sub>3</sub>)**

YP-C-NMR-0615-5.1.fid

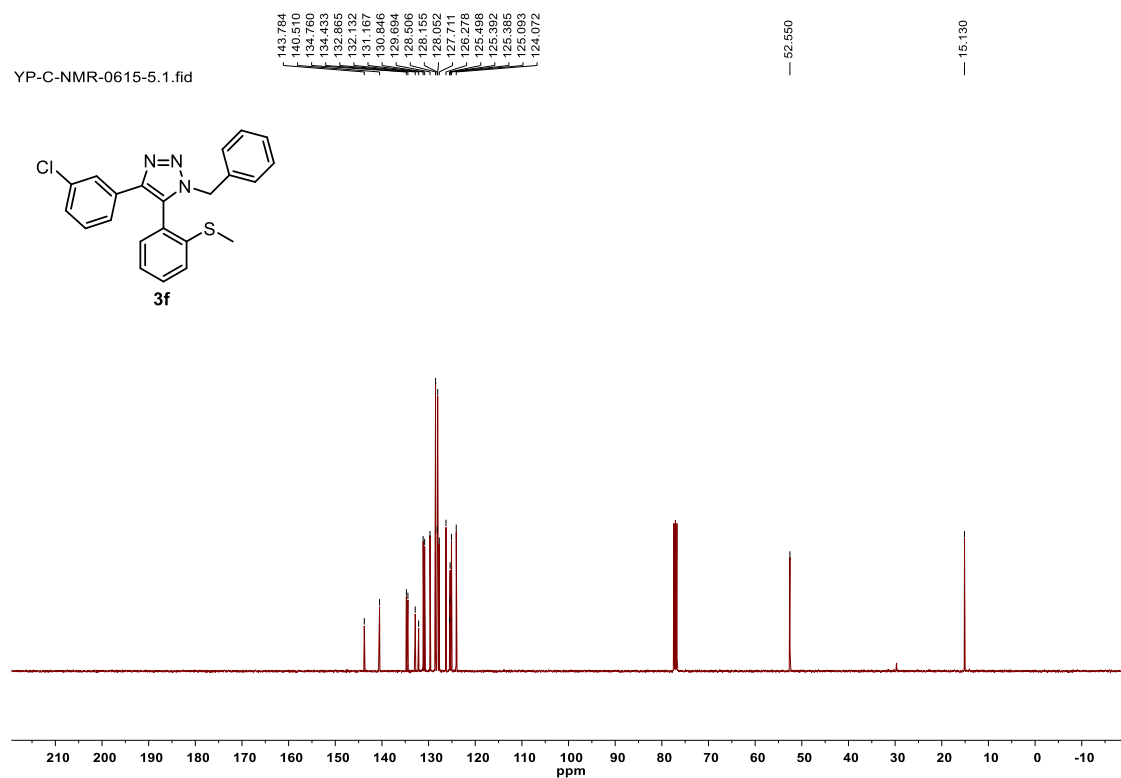

<sup>13</sup>C NMR spectrum of 3f (101 MHz, CDCl<sub>3</sub>)

YP-H-NMR-6.1.fid

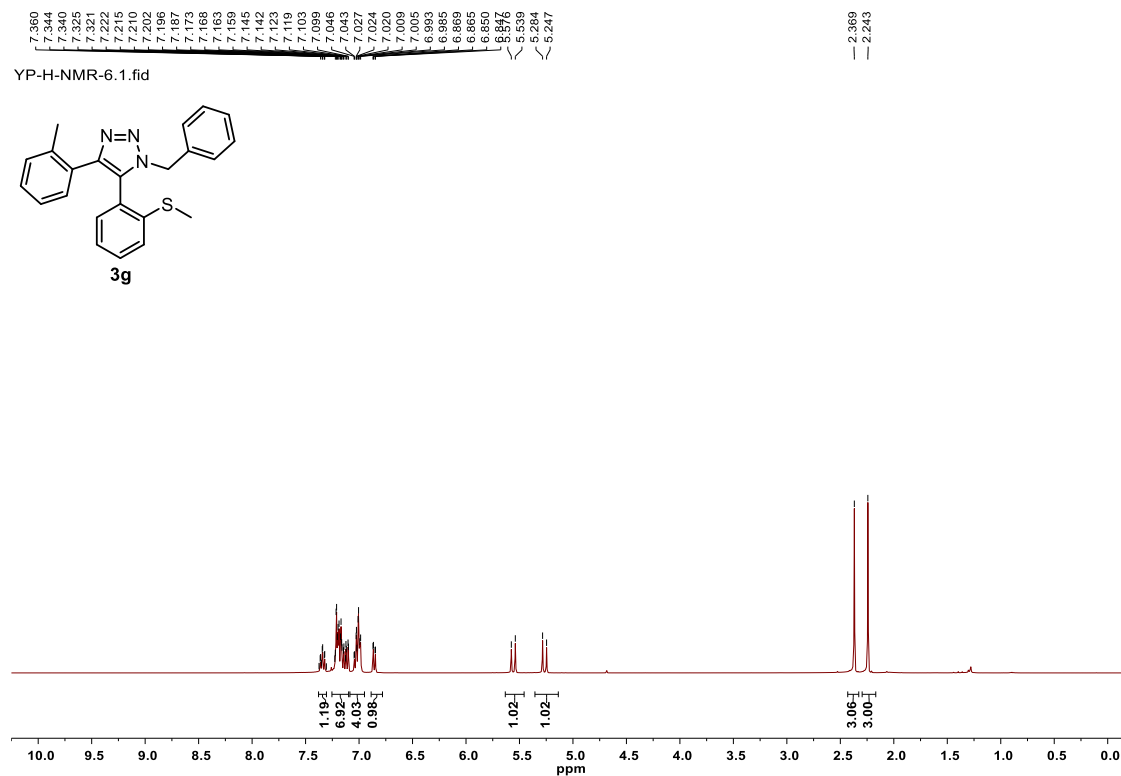

<sup>1</sup>H NMR spectrum of 3g (400 MHz, CDCl<sub>3</sub>)

YP-C-NMR-0607-6.1.fid

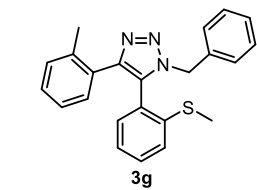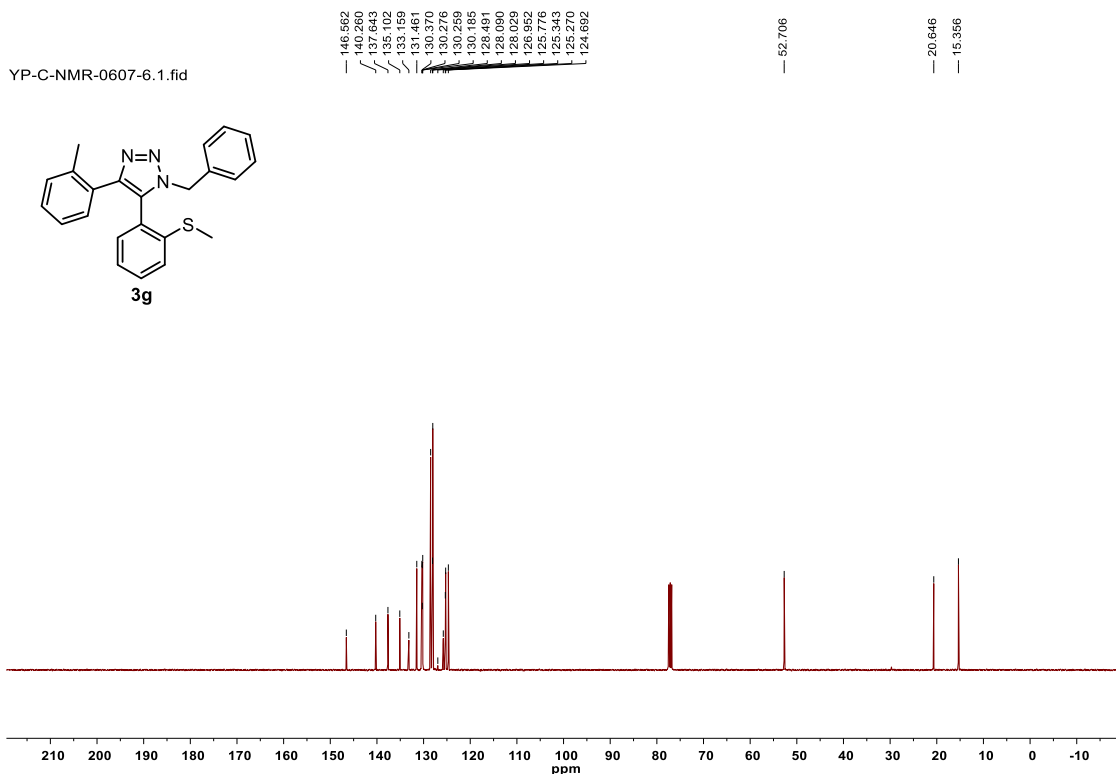

<sup>13</sup>C NMR spectrum of 3g (101 MHz, CDCl<sub>3</sub>)

YP-H-NMR-4.1.fid

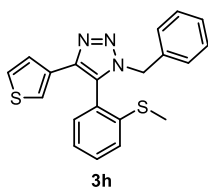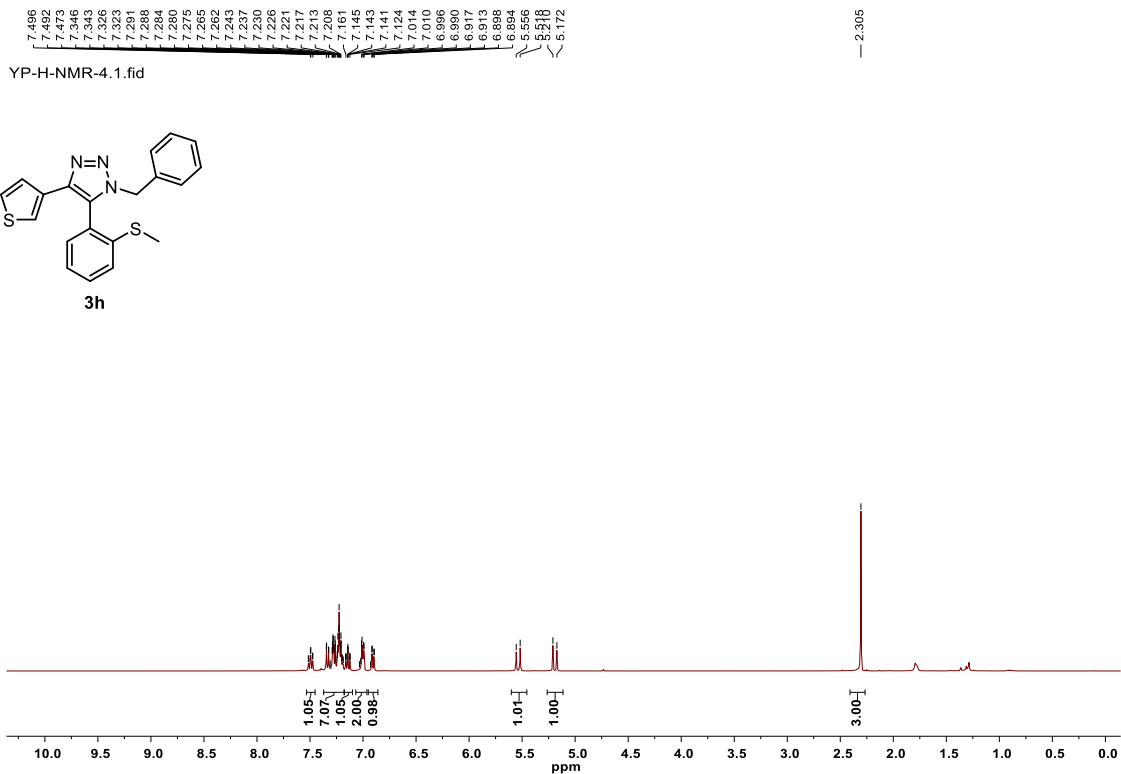

<sup>1</sup>H NMR spectrum of 3h (400 MHz, CDCl<sub>3</sub>)

YP-C-NMR-0607-4.1.fid

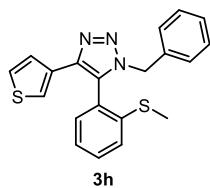

142.114  
140.890  
139.892  
131.972  
131.886  
130.692  
128.460  
128.074  
128.017  
125.865  
125.481  
125.036  
121.115

— 52.523

— 15.208

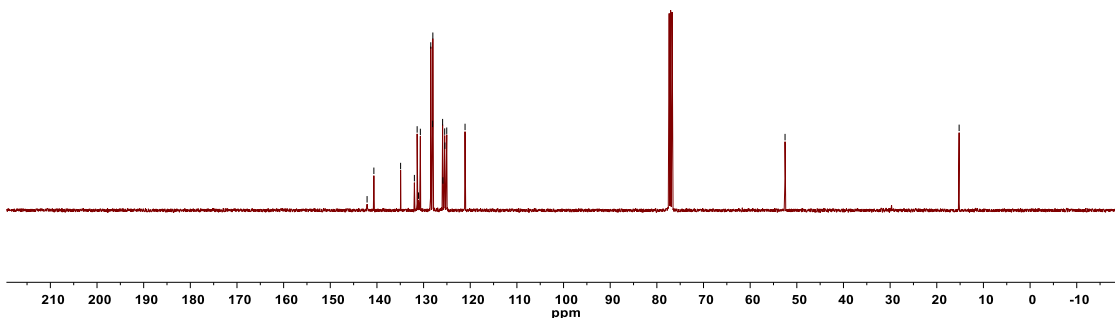

**<sup>13</sup>C NMR spectrum of 3h (101 MHz, CDCl<sub>3</sub>)**

YP-H-NMR-1.1.fid

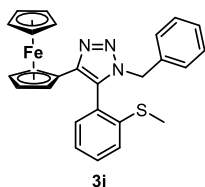

7.483  
7.480  
7.464  
7.460  
7.444  
7.441  
7.316  
7.313  
7.296  
7.293  
7.204  
7.200  
7.195  
7.185  
7.182  
7.182  
7.174  
7.169  
7.156  
7.121  
7.118  
7.102  
7.083  
7.080  
6.943  
6.939  
6.934  
6.925  
6.919  
6.837  
6.834  
6.818  
6.814  
6.824  
5.485  
5.117  
5.079  
4.583  
4.405  
4.239  
4.213  
4.106

— 2.371

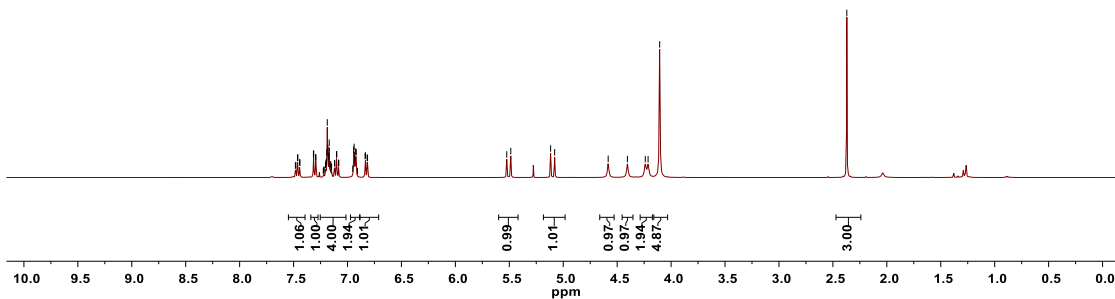

**<sup>1</sup>H NMR spectrum of 3i (400 MHz, CDCl<sub>3</sub>)**



YP-C-NMR-0607-1.1.fid

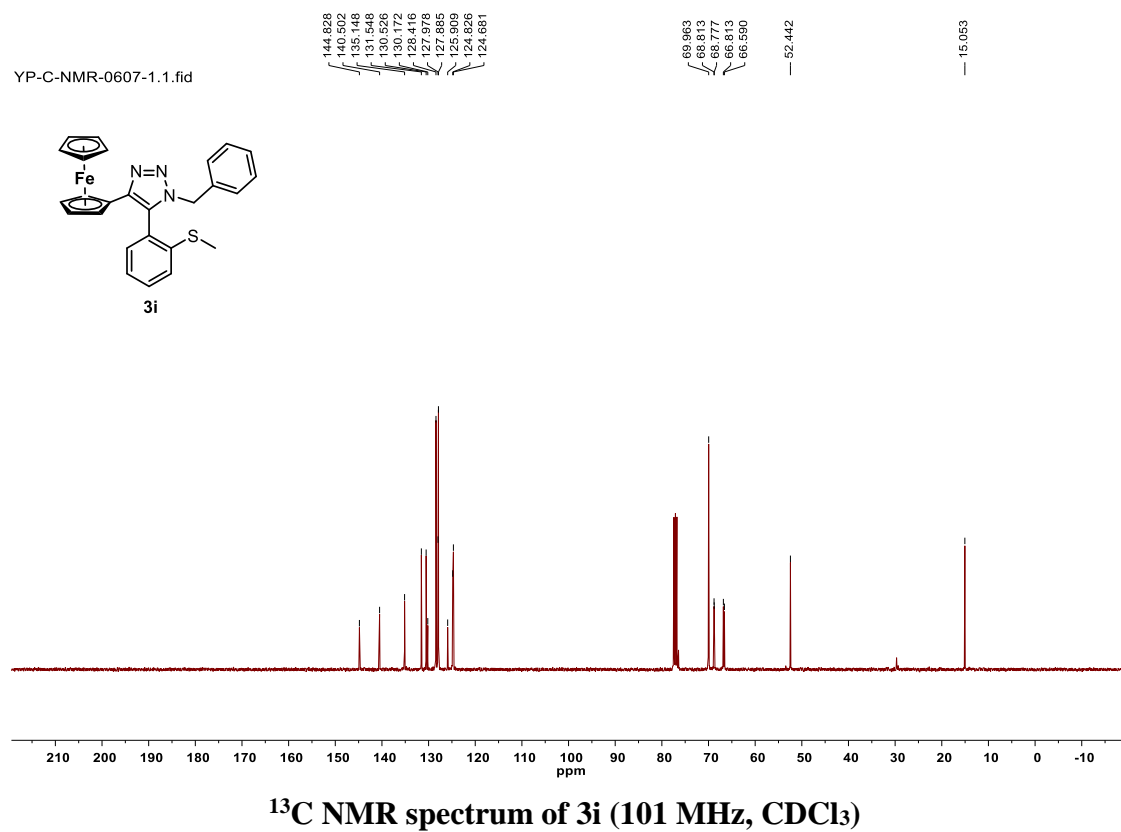

底物.2.fid

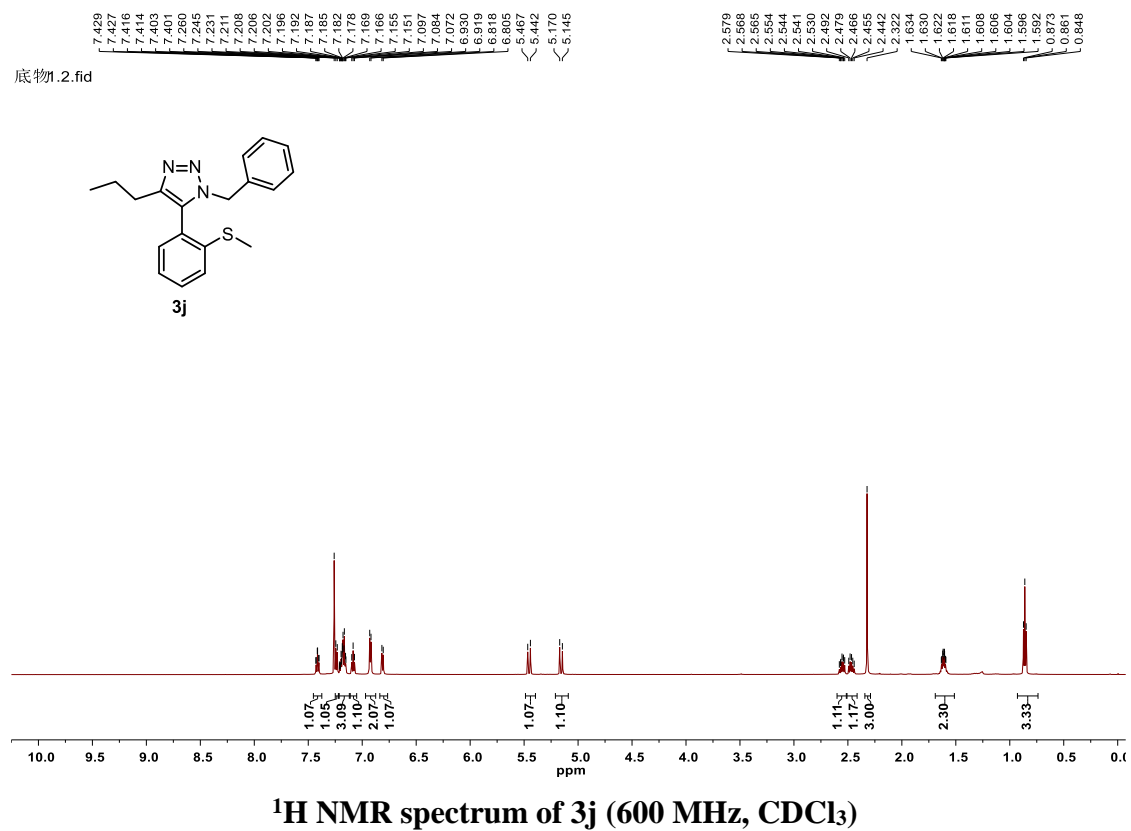

底物.3.fid

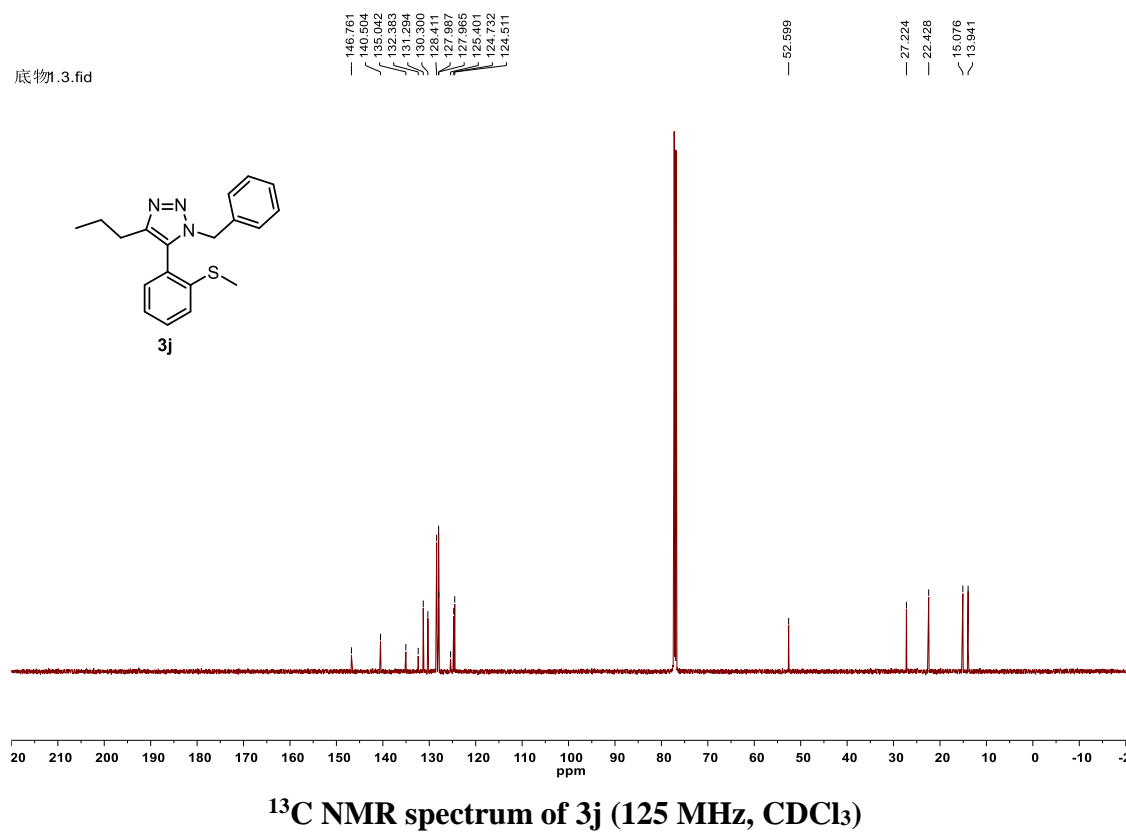

YP-NMR-12.1.fid

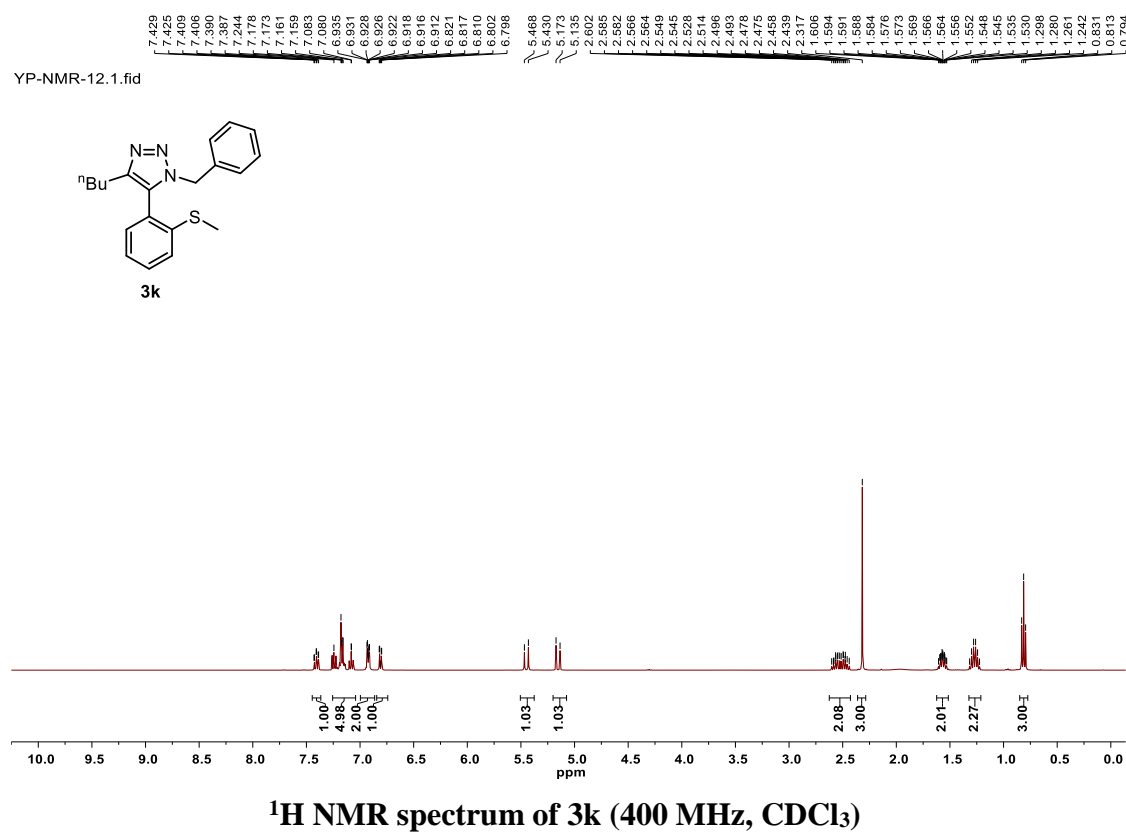

YP-C-NMR-12.1.fid

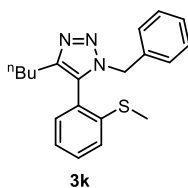

147.014  
140.484  
135.174  
135.170  
131.280  
130.197  
128.370  
127.855  
127.886  
125.699  
124.836  
124.808  
124.506

52.495

31.196  
24.946  
22.360  
15.107  
13.726

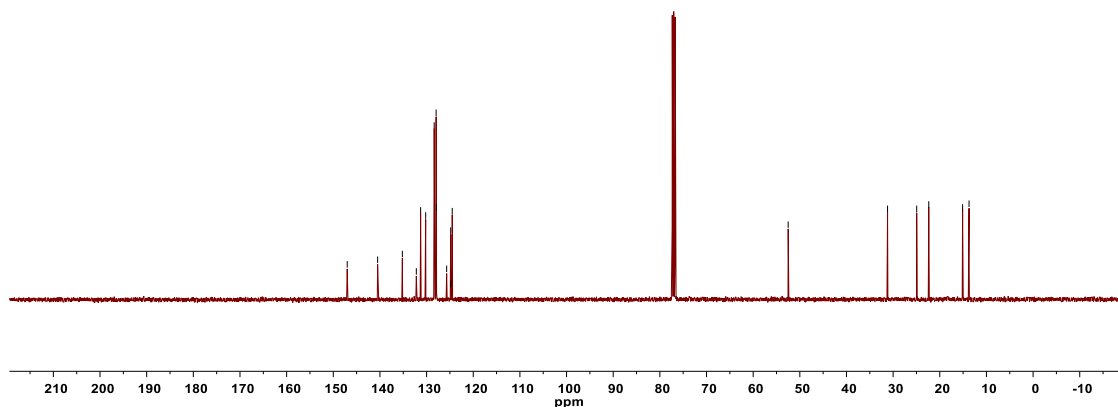

**<sup>13</sup>C NMR spectrum of 3k (101 MHz, CDCl<sub>3</sub>)**

YP-NMR-9.1.fid

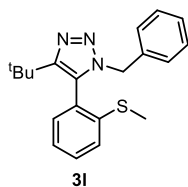

7.417  
7.413  
7.397  
7.394  
7.378  
7.374  
7.310  
7.210  
7.192  
7.184  
7.179  
7.174  
7.164  
7.160  
7.025  
7.020  
7.007  
7.004  
6.988  
6.985  
6.918  
6.914  
6.900  
6.895  
6.754  
6.754  
6.739  
6.735  
5.418  
5.381

2.349

1.223

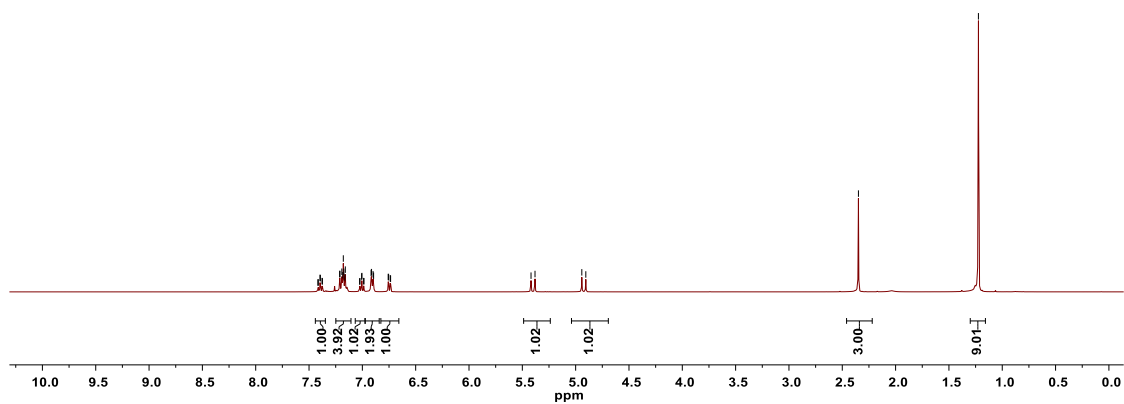

**<sup>1</sup>H NMR spectrum of 3l (400 MHz, CDCl<sub>3</sub>)**

YP-C-NMR-9.1.fid

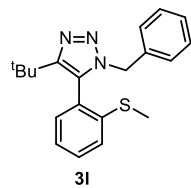

153.850  
140.744  
133.620  
132.626  
130.417  
130.075  
129.857  
128.300  
128.079  
127.835  
127.007  
123.954

52.174

31.954  
30.307

14.754

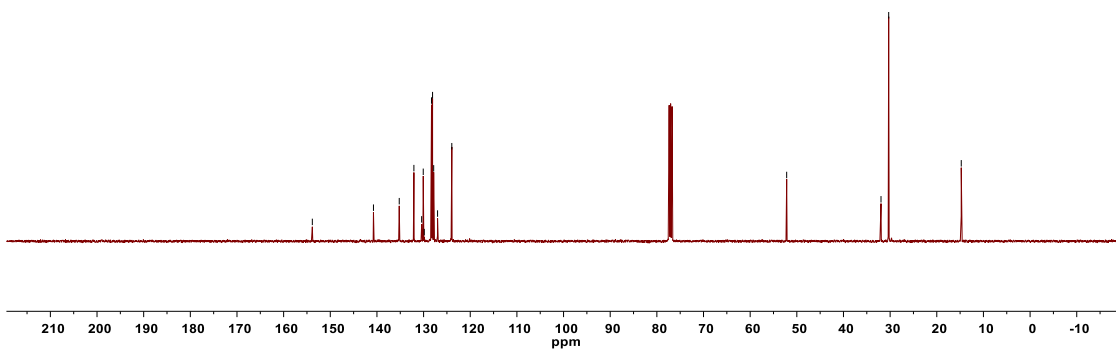

**<sup>13</sup>C NMR spectrum of 3l (101 MHz, CDCl<sub>3</sub>)**

7.445  
7.426  
7.426  
7.422  
7.407  
7.403  
7.285  
7.266  
7.202  
7.198  
7.186  
7.180  
7.185  
7.180  
7.172  
7.167  
7.159  
7.153  
7.149  
7.144  
7.131  
7.128  
7.112  
7.109  
7.094  
6.989  
6.985  
6.945  
6.945  
6.932  
6.926  
6.901  
6.897  
6.882  
5.822  
5.425  
5.175  
5.138  
2.324  
1.663  
1.654  
1.642  
1.642  
1.633  
1.629  
1.620  
1.608  
0.968  
0.968  
0.963  
0.956  
0.955  
0.950  
0.947  
0.944  
0.830  
0.821  
0.816  
0.822  
0.817  
0.814  
0.812  
0.805  
0.801  
0.796  
0.793  
0.791  
0.784  
0.776  
0.776  
0.772

YP-H-NMR-11.1.fid

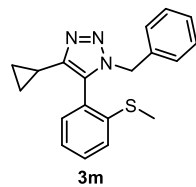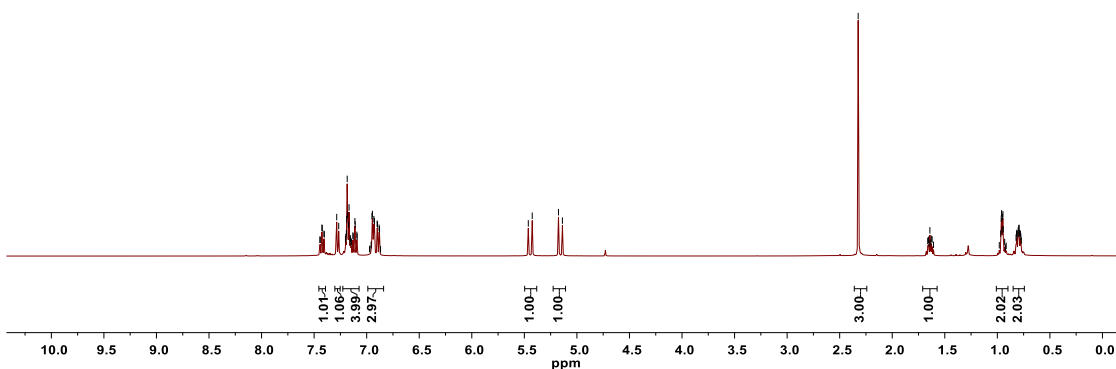

**<sup>1</sup>H NMR spectrum of 3m (400 MHz, CDCl<sub>3</sub>)**

YP-C-NMR-0607-8.1.fid

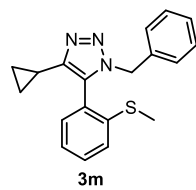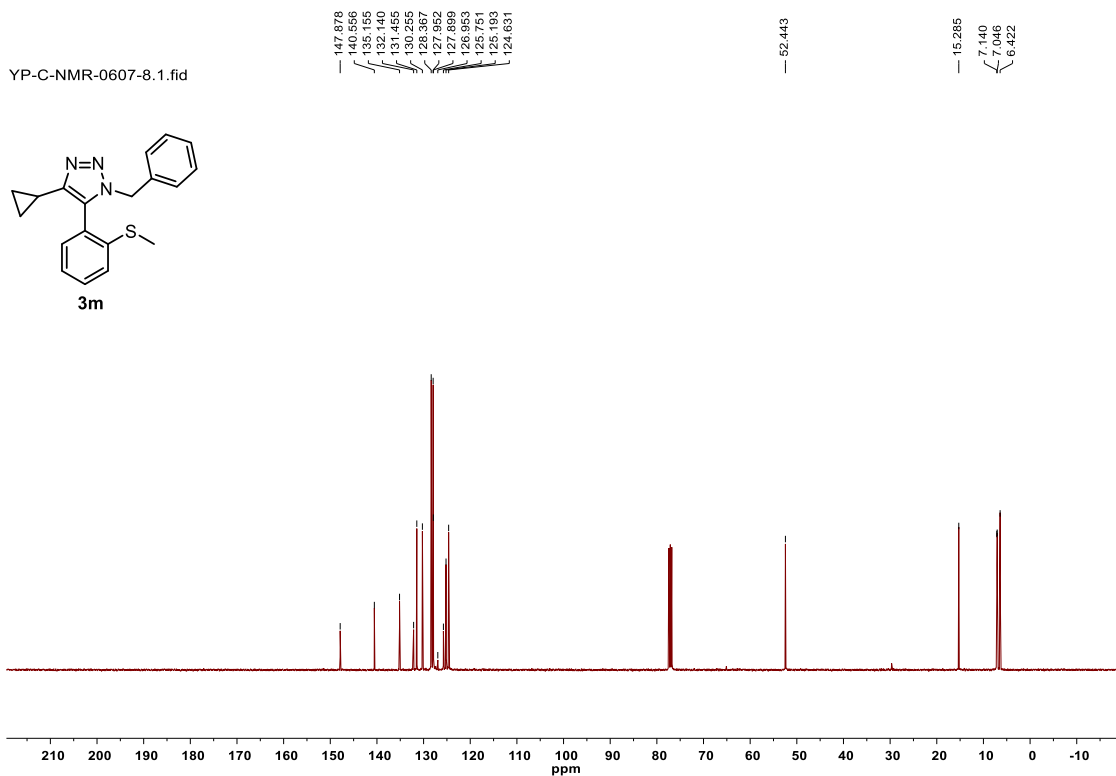

7.440  
7.437  
7.421  
7.417  
7.402  
7.384  
7.270  
7.250  
7.215  
7.212  
7.210  
7.202  
7.184  
7.176  
7.163  
7.160  
7.155  
7.153  
7.099  
7.096  
7.090  
7.077  
7.061  
6.944  
6.840  
6.825  
6.820  
6.846  
6.842  
6.823  
6.804  
6.802  
6.603  
6.603  
6.602  
6.602  
6.017  
5.942  
5.942  
5.428  
5.108  
5.071  
2.324  
2.308  
2.302  
2.296  
2.286  
2.281  
2.275  
2.271  
2.265  
2.259  
2.052  
2.044  
2.036  
2.020  
2.020  
2.011  
1.665  
1.657  
1.651  
1.642  
1.637  
1.621  
1.621  
1.614  
1.611  
1.606  
1.587  
1.587  
1.572  
1.565  
1.557  
1.552  
1.542

YP-H-NMR-2.1.fid

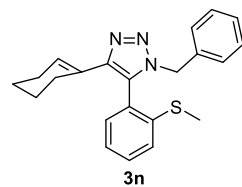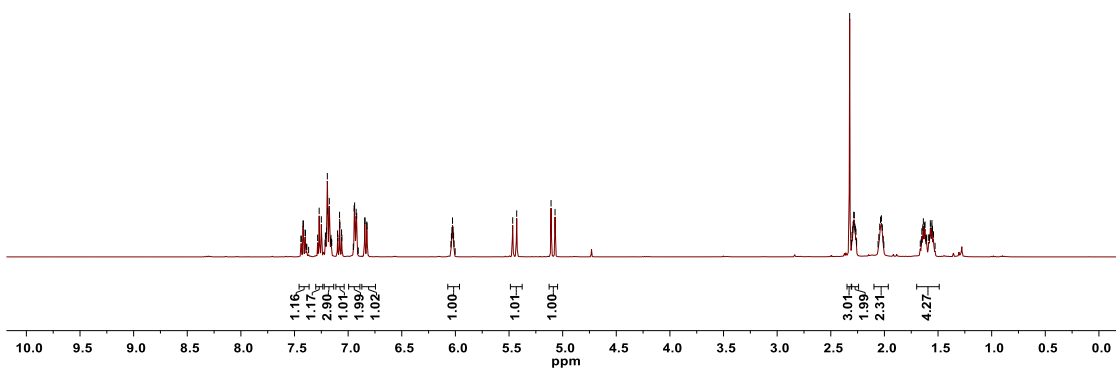

YP-C-NMR-0607--2.1.fid

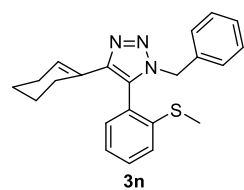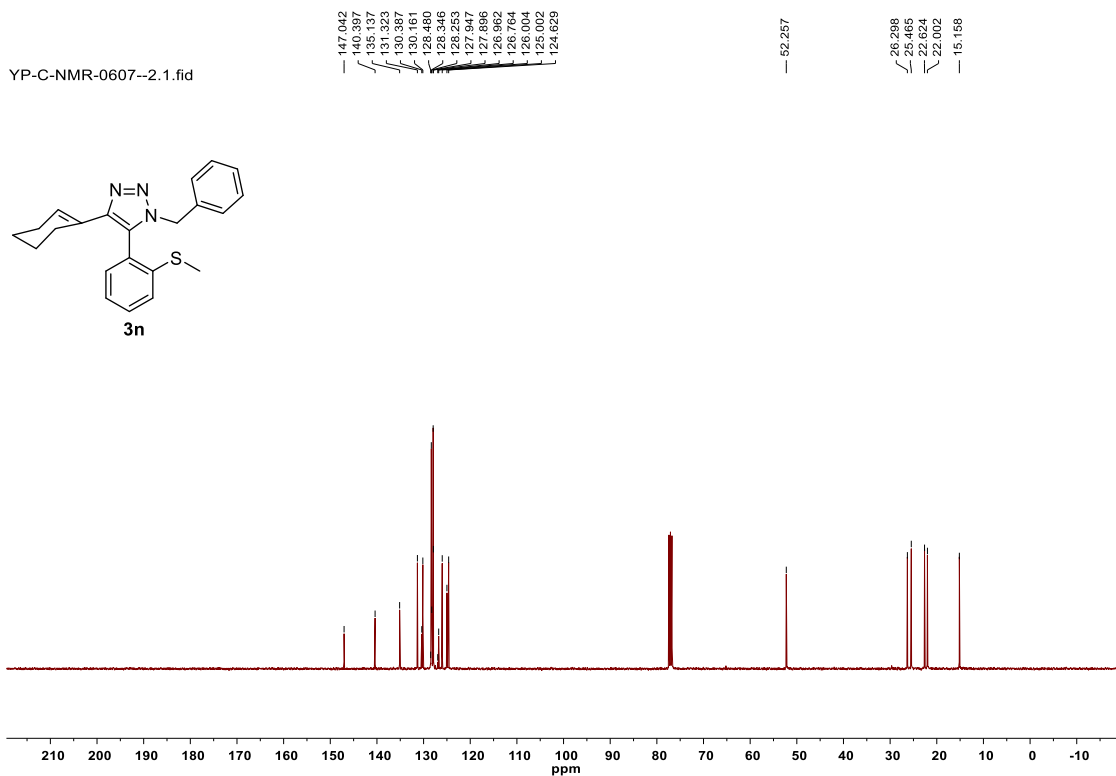

**<sup>13</sup>C NMR spectrum of 3n (101 MHz, CDCl<sub>3</sub>)**

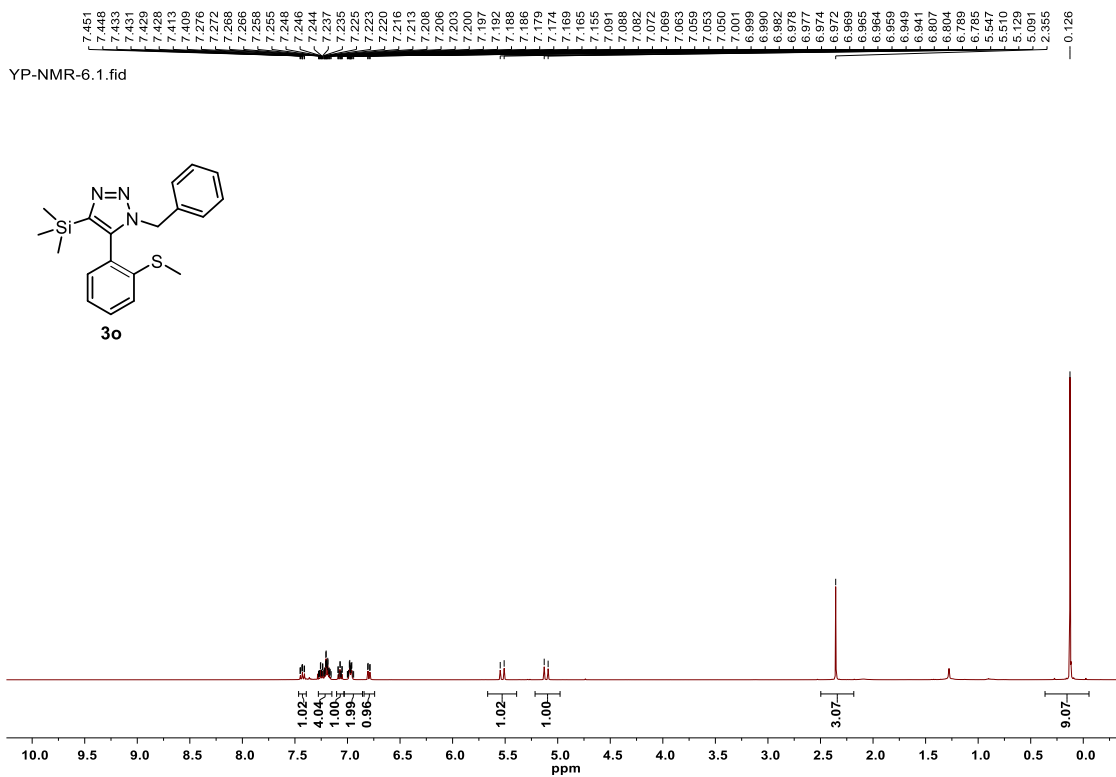

**<sup>1</sup>H NMR spectrum of 3o (400 MHz, CDCl<sub>3</sub>)**

YP-C-NMR-6.1.fid

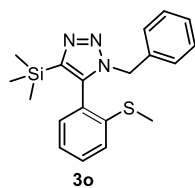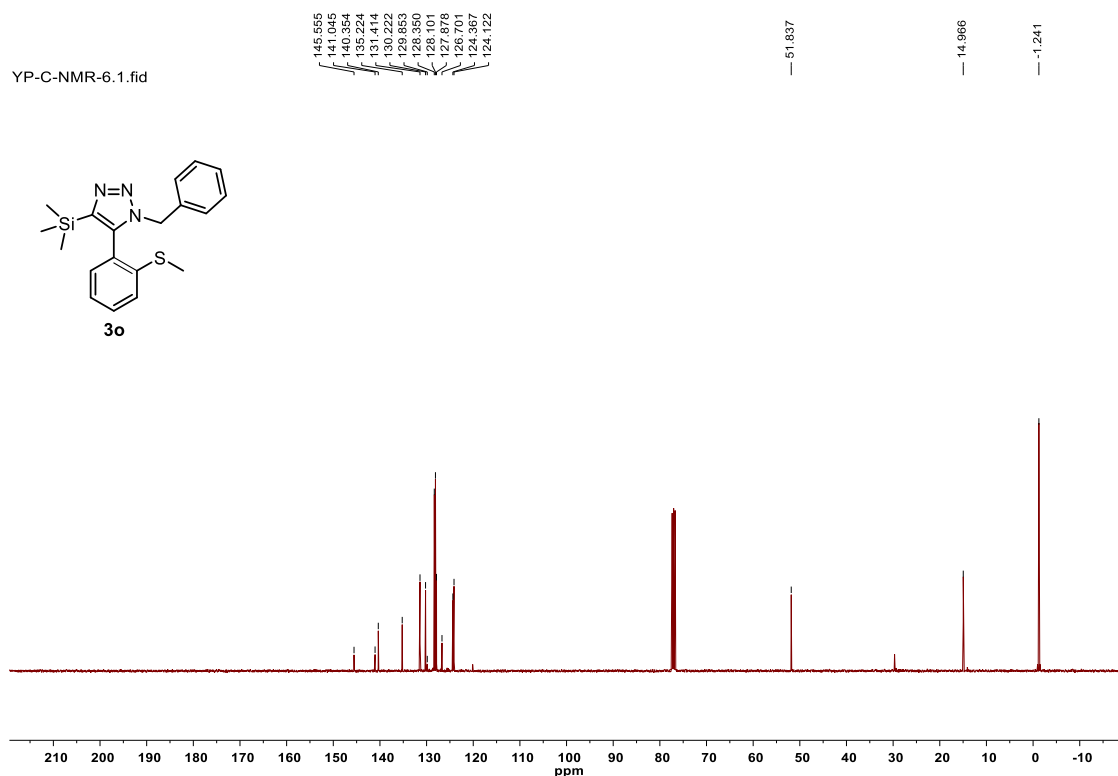

<sup>13</sup>C NMR spectrum of 3o (101 MHz, CDCl<sub>3</sub>)

YP-H-NMR-9.1.fid

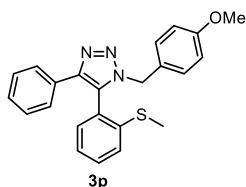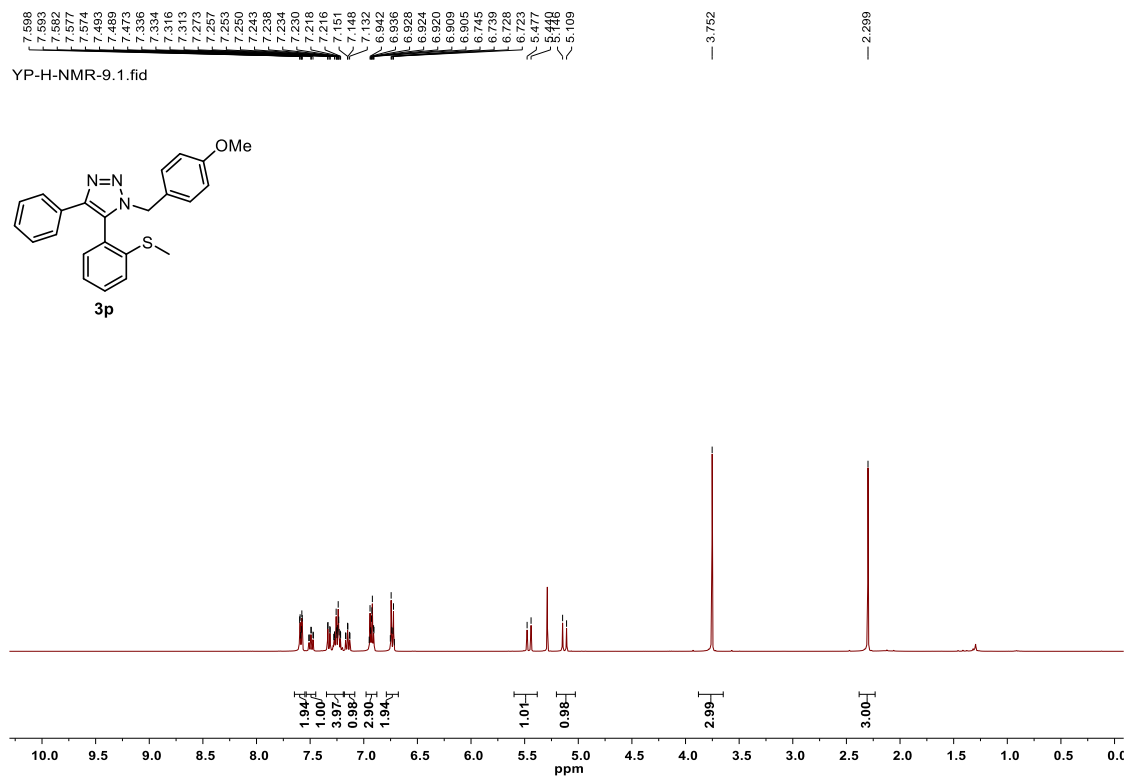

<sup>1</sup>H NMR spectrum of 3p (400 MHz, CDCl<sub>3</sub>)

YP-C-NMR-0607-9.1.fid

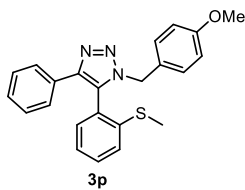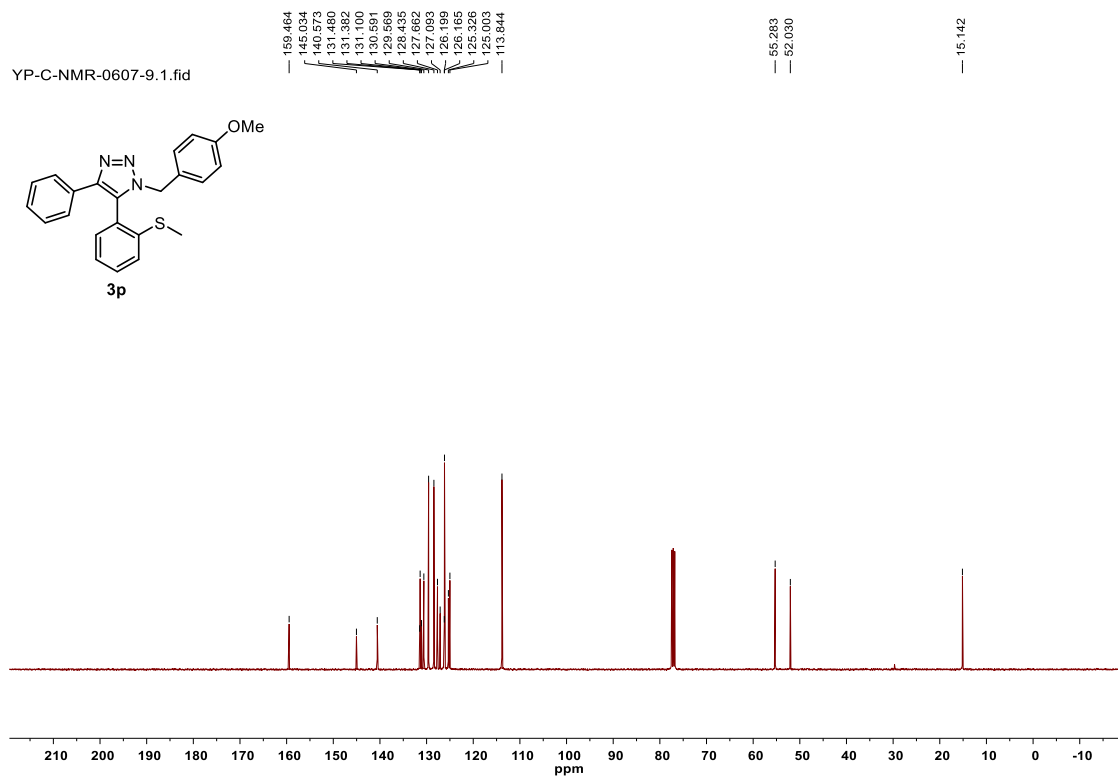

**$^{13}\text{C}$  NMR spectrum of 3p (101 MHz,  $\text{CDCl}_3$ )**

YP-NMR-1.1.fid

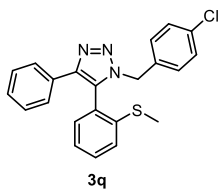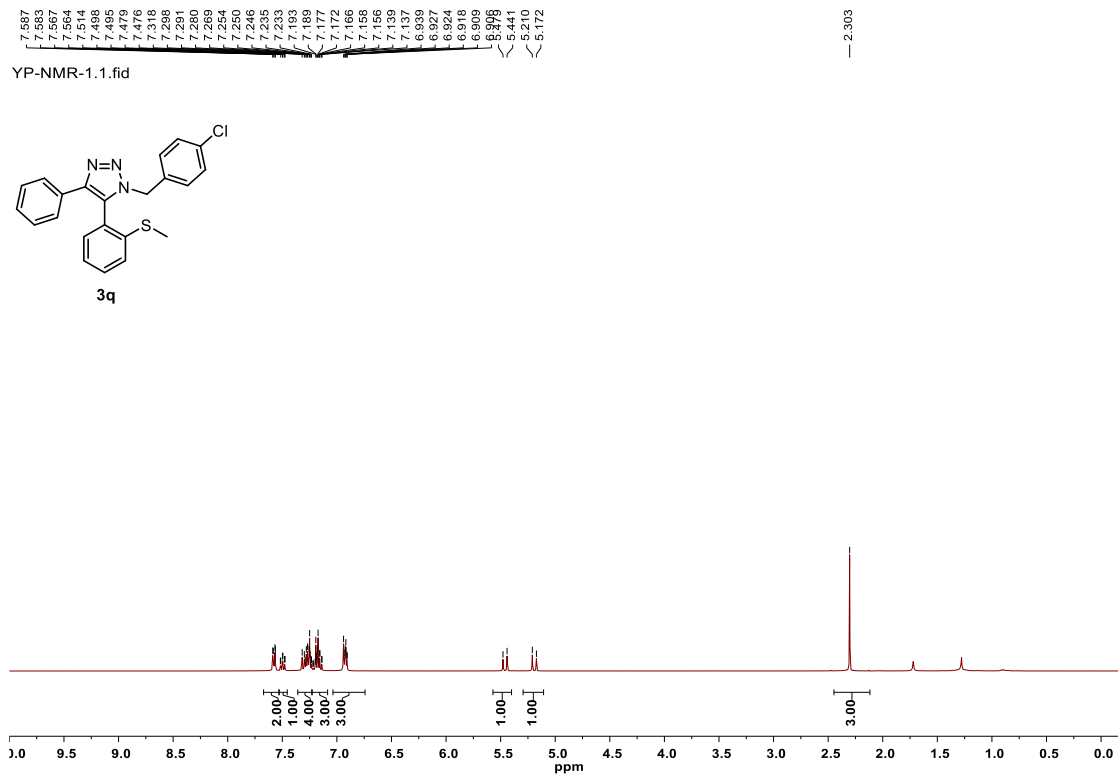

**$^1\text{H}$  NMR spectrum of 3q (400 MHz,  $\text{CDCl}_3$ )**



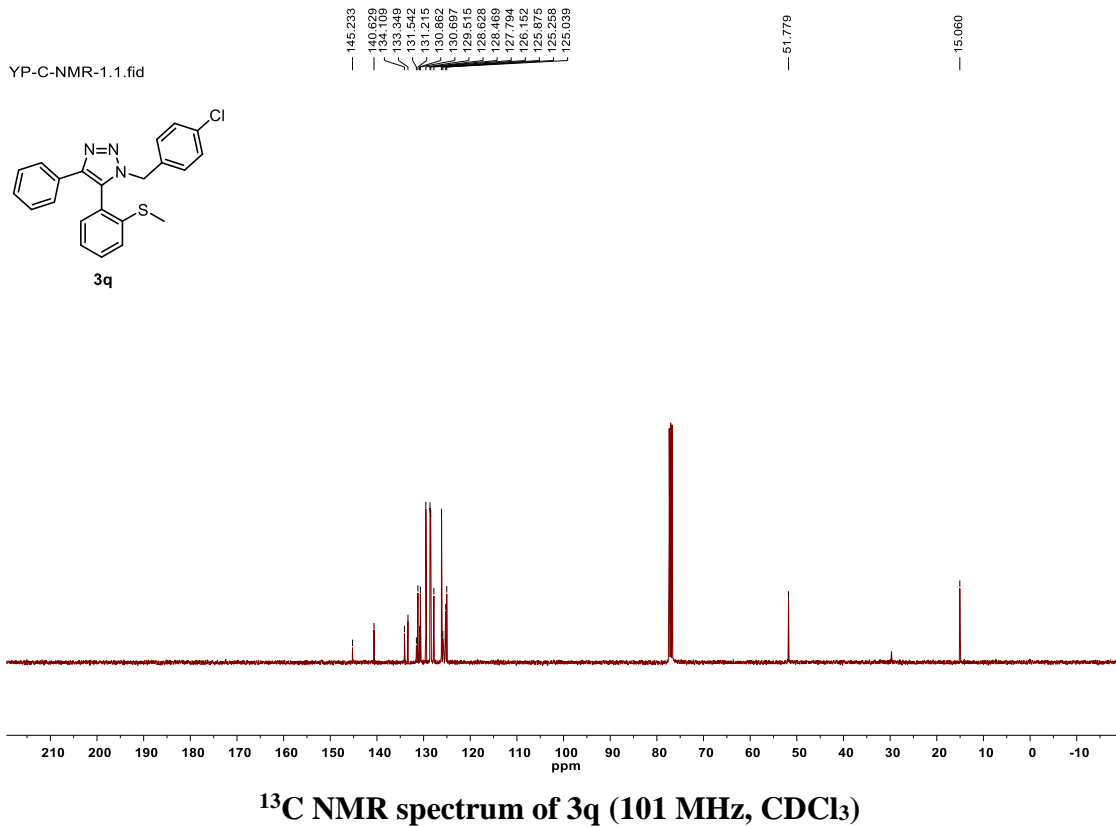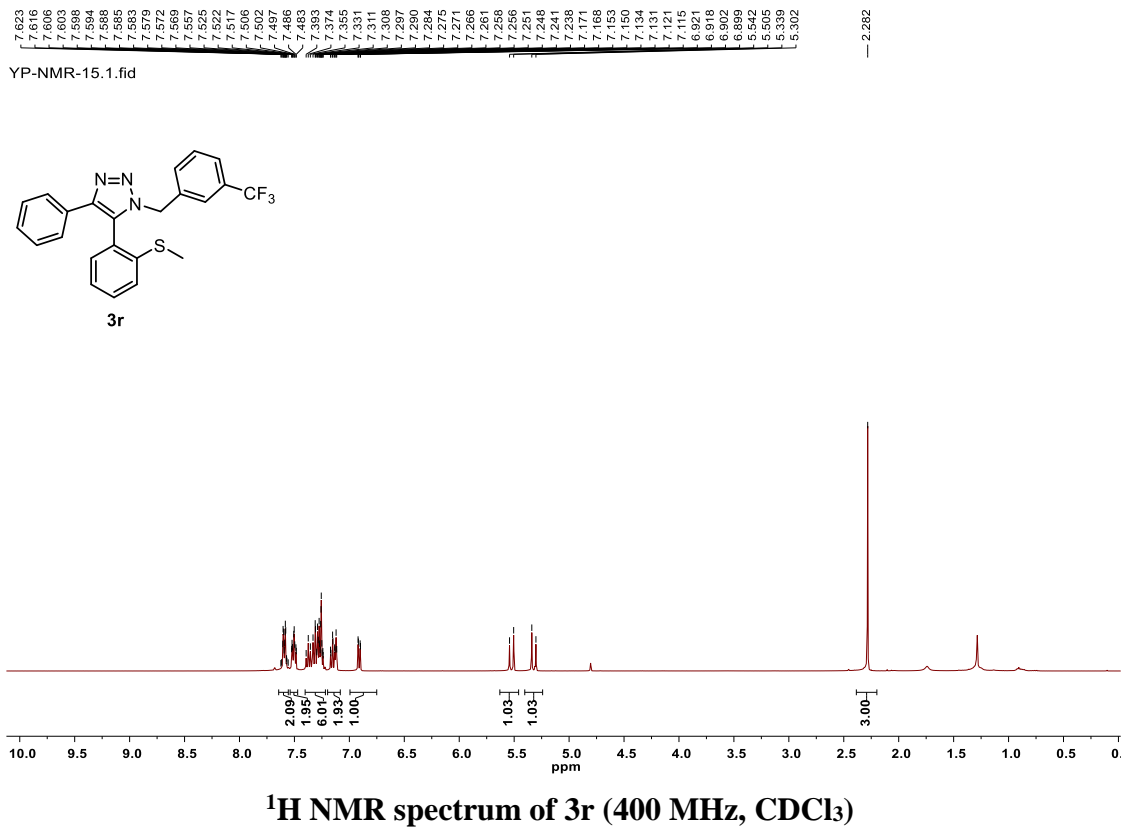

YP-C-NMR-15.1.fid

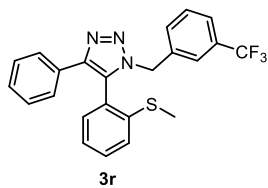

145.316  
140.889  
135.677  
131.722  
131.090  
130.851  
130.829  
130.783  
130.627  
129.117  
128.485  
127.849  
127.634  
125.184  
125.152  
125.114  
125.077  
125.046  
125.009  
124.972

— 52.042

— 14.889

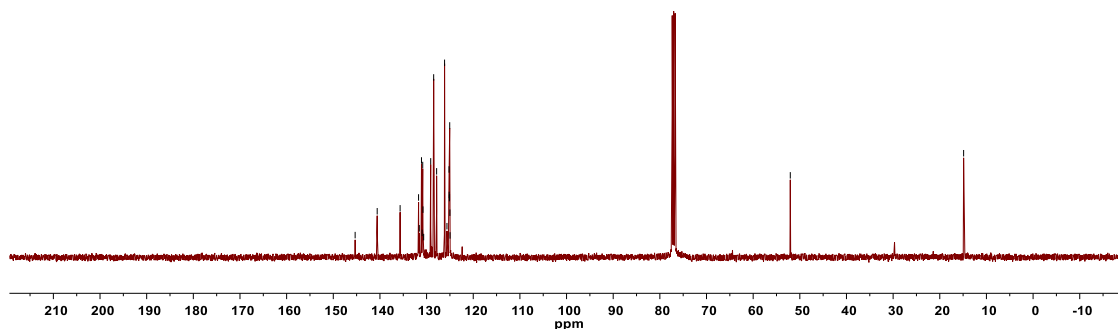

**$^{13}\text{C}$  NMR spectrum of 3r (101 MHz,  $\text{CDCl}_3$ )**

YP-CF3.2.fid

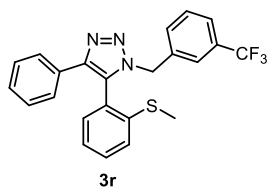

— -62.722

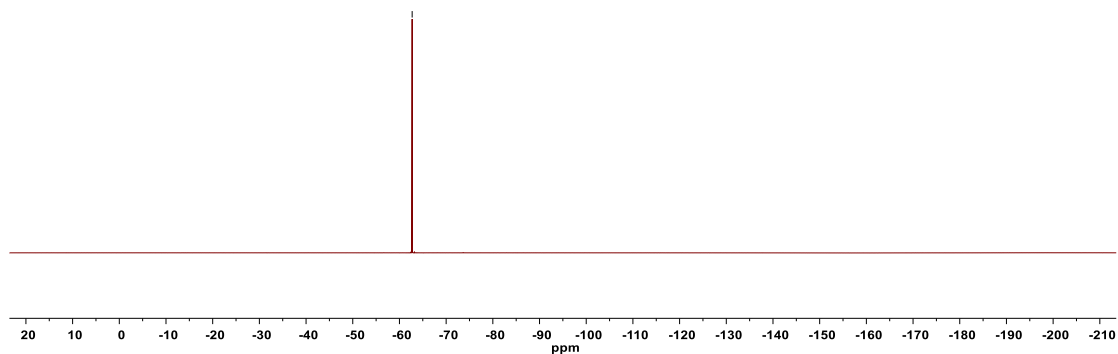

**$^{19}\text{F}$  NMR spectrum of 3r (376 MHz,  $\text{CDCl}_3$ )**



YP-3.2.fid

-112.560

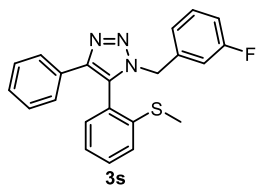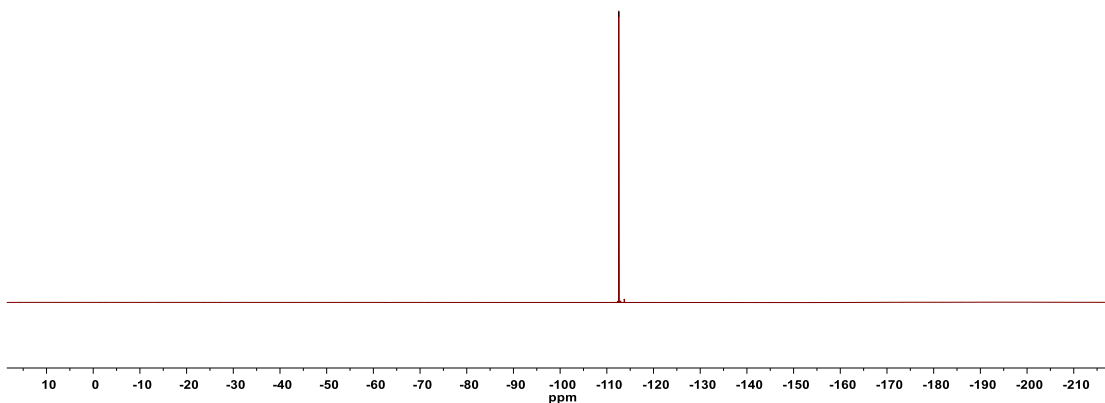

**<sup>19</sup>F NMR spectrum of 3s (376 MHz, CDCl<sub>3</sub>)**

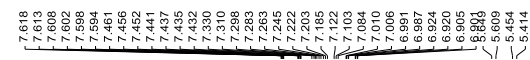

-2.333

YP-H-NMR-5.1.fid

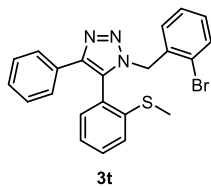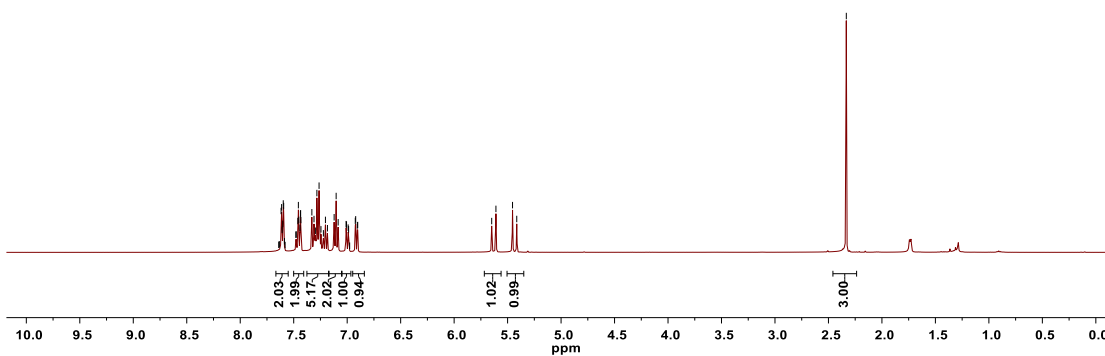

**<sup>1</sup>H NMR spectrum of 3t (400 MHz, CDCl<sub>3</sub>)**

YP-C-NMR-0607-5.1.fid

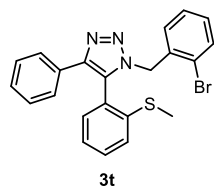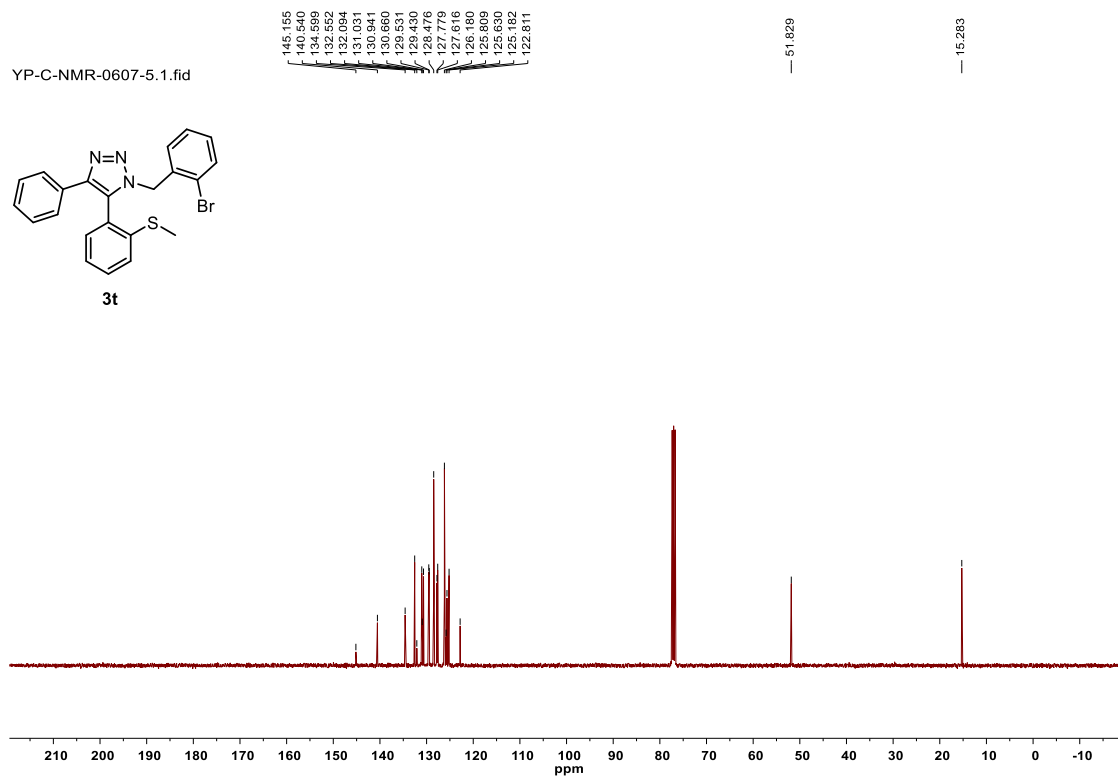

<sup>13</sup>C NMR spectrum of 3t (101 MHz, CDCl<sub>3</sub>)

YP-NMR-10.1.fid

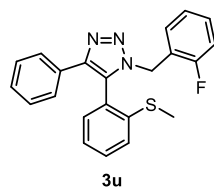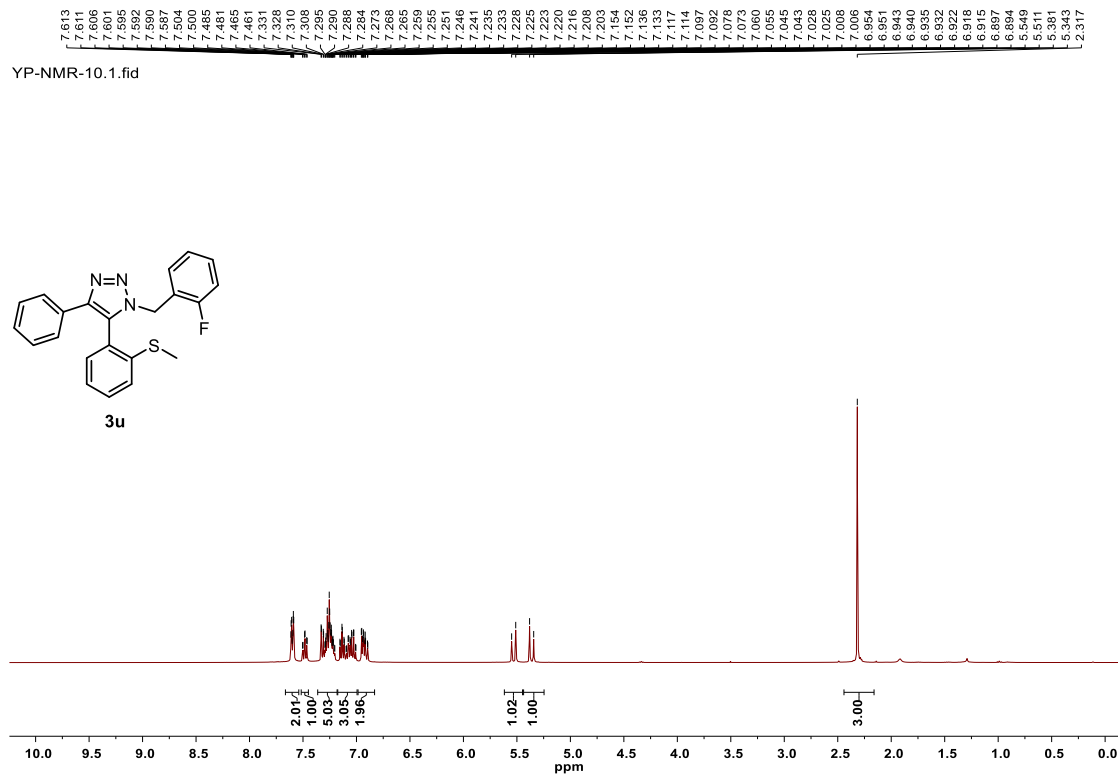

<sup>1</sup>H NMR spectrum of 3u (400 MHz, CDCl<sub>3</sub>)

YP-C-NMR-10.1.fid

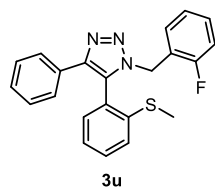

161.433  
158.864  
145.054  
140.892  
133.892  
131.046  
130.979  
130.644  
130.197  
130.164  
130.011  
129.981  
129.951  
127.740  
126.187  
125.822  
125.388  
125.093  
124.261  
124.223  
122.503  
122.303  
115.311  
115.089

45.598  
45.580

15.155

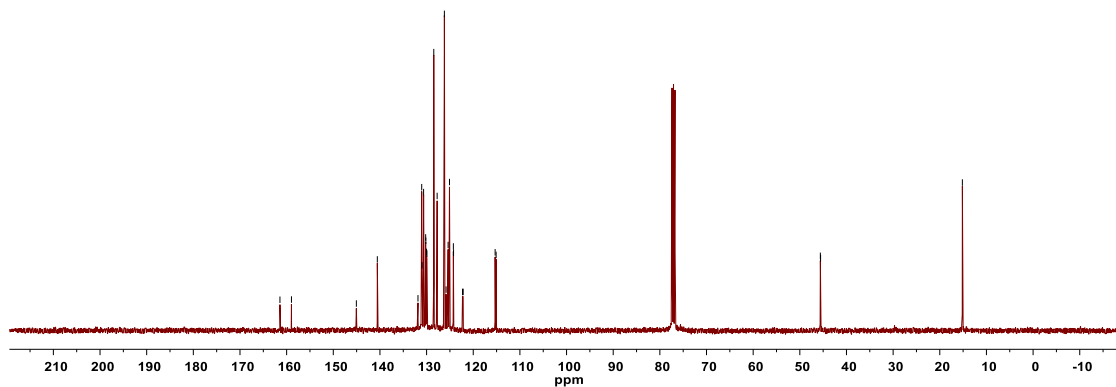

**<sup>13</sup>C NMR spectrum of 3u (101 MHz, CDCl<sub>3</sub>)**

YP-10.2.fid

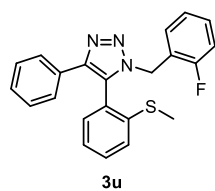

-118.257

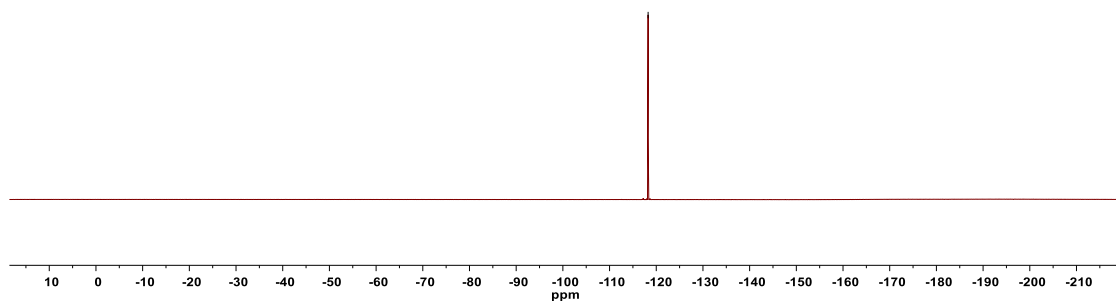

**<sup>19</sup>F NMR spectrum of 3u (376 MHz, CDCl<sub>3</sub>)**

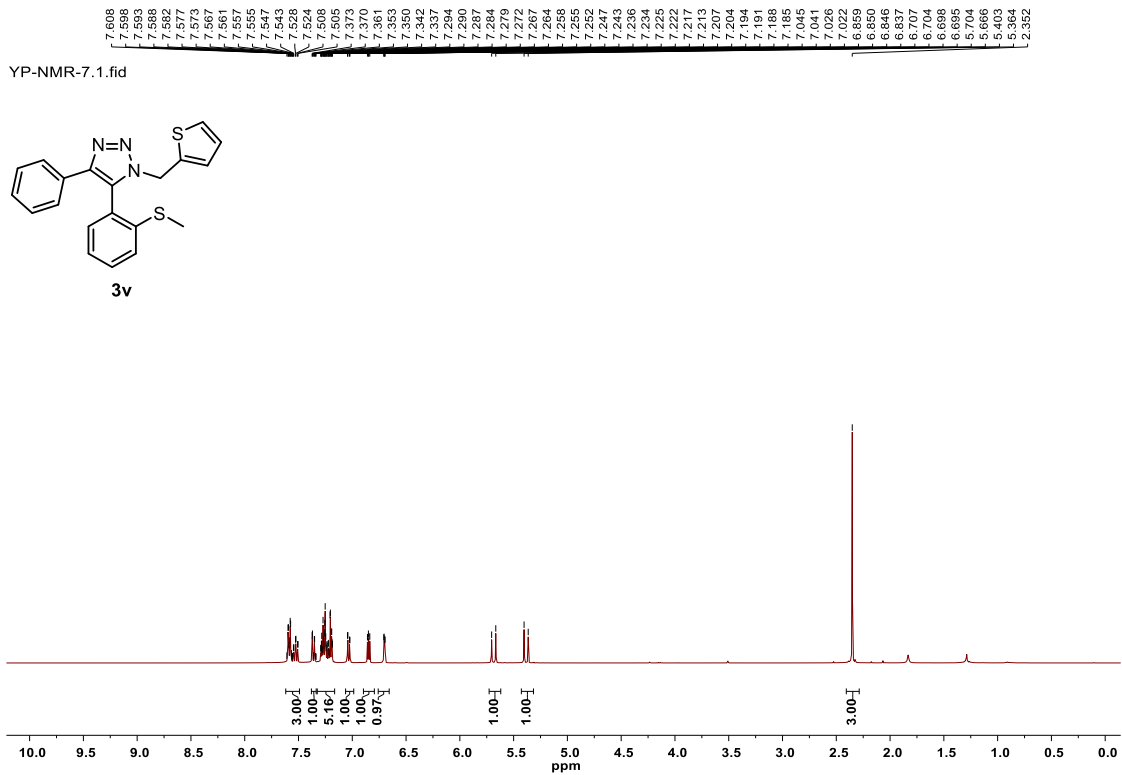

<sup>1</sup>H NMR spectrum of 3v (400 MHz, CDCl<sub>3</sub>)

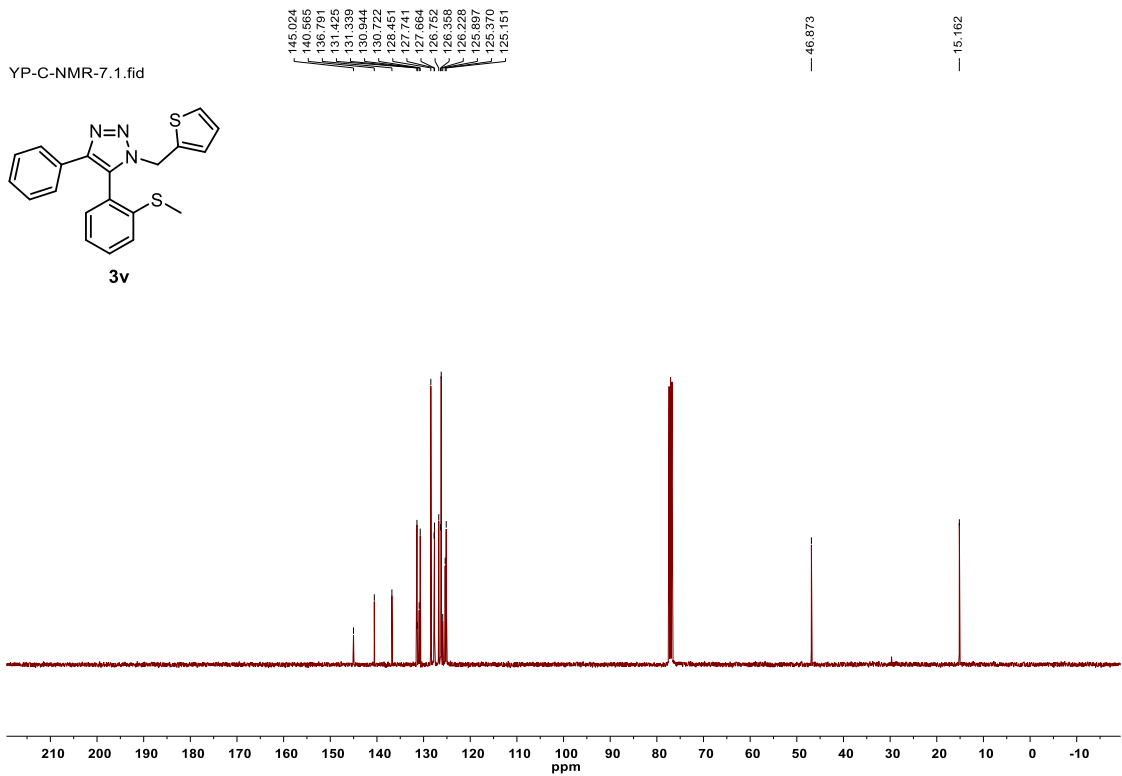

<sup>13</sup>C NMR spectrum of 3v (101 MHz, CDCl<sub>3</sub>)

8.128  
8.119  
8.111  
8.106  
8.104  
8.096  
8.094  
8.086  
8.086  
7.831  
7.823  
7.820  
7.817  
7.817  
7.803  
7.751  
7.730  
7.693  
7.689  
7.684  
7.577  
7.563  
7.566  
7.566  
7.555  
7.513  
7.508  
7.496  
7.491  
7.482  
7.462  
7.455  
7.450  
7.438  
7.435  
7.419  
7.415  
7.400  
7.396  
7.393  
7.384  
7.277  
7.269  
7.255  
7.250  
7.247  
7.241  
7.236  
7.236  
7.229  
7.226  
7.219  
7.219  
7.216  
7.211  
7.203  
7.200  
7.195  
7.190  
7.182  
7.172  
7.028  
7.025  
7.009  
7.006  
6.990  
6.987  
6.985  
6.985  
6.790  
6.779  
6.776  
6.761  
6.757  
6.079  
6.041  
5.734  
2.250

YP-H-NMR-7.1.fid

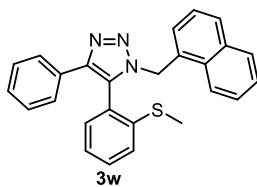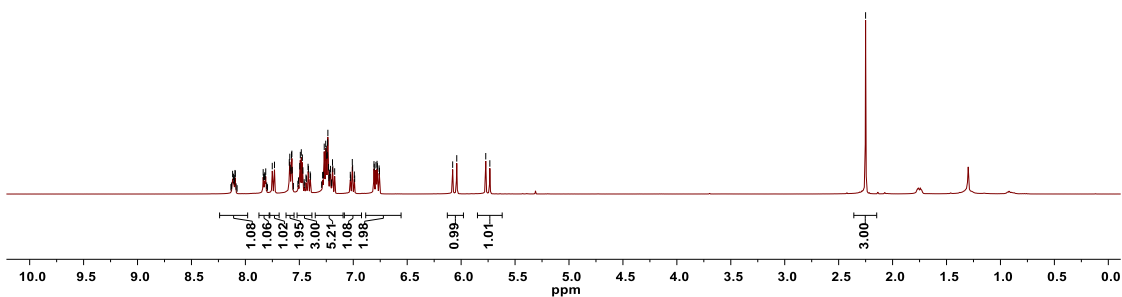

<sup>1</sup>H NMR spectrum of **3w** (400 MHz, CDCl<sub>3</sub>)

YP-C-NMR-0607-7.1.fid

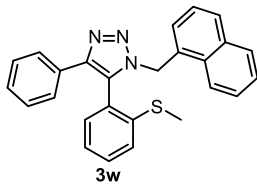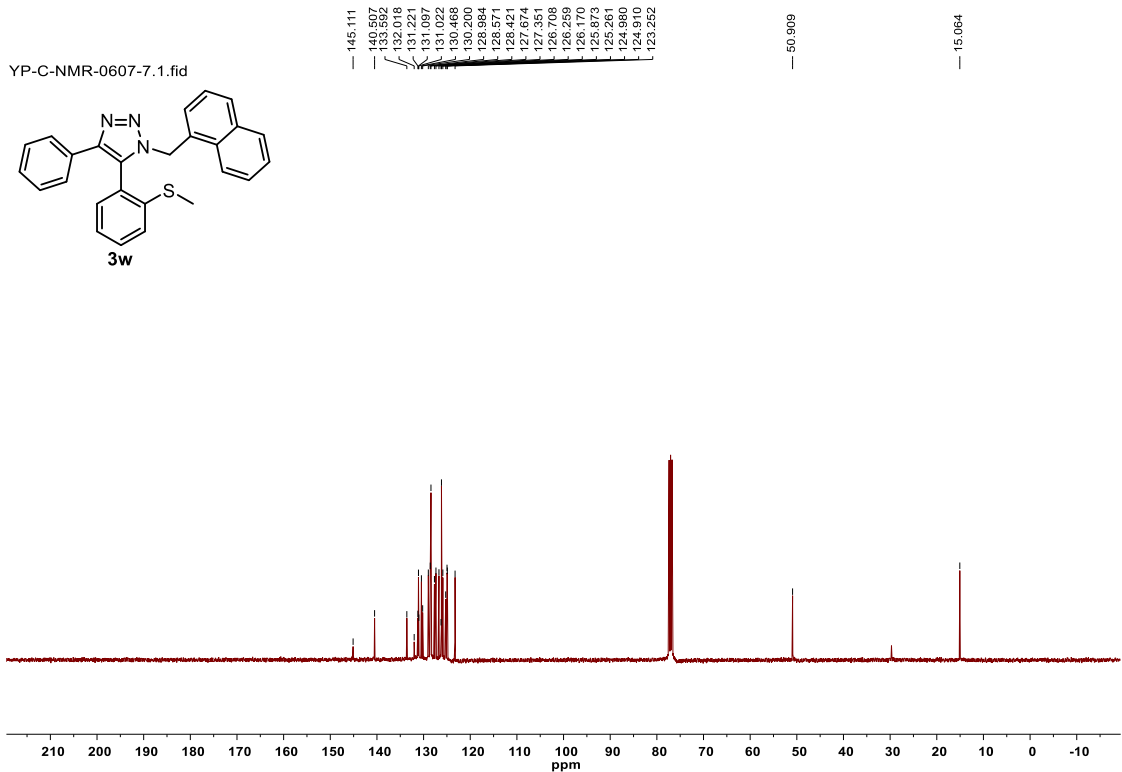

<sup>13</sup>C NMR spectrum of **3w** (101 MHz, CDCl<sub>3</sub>)



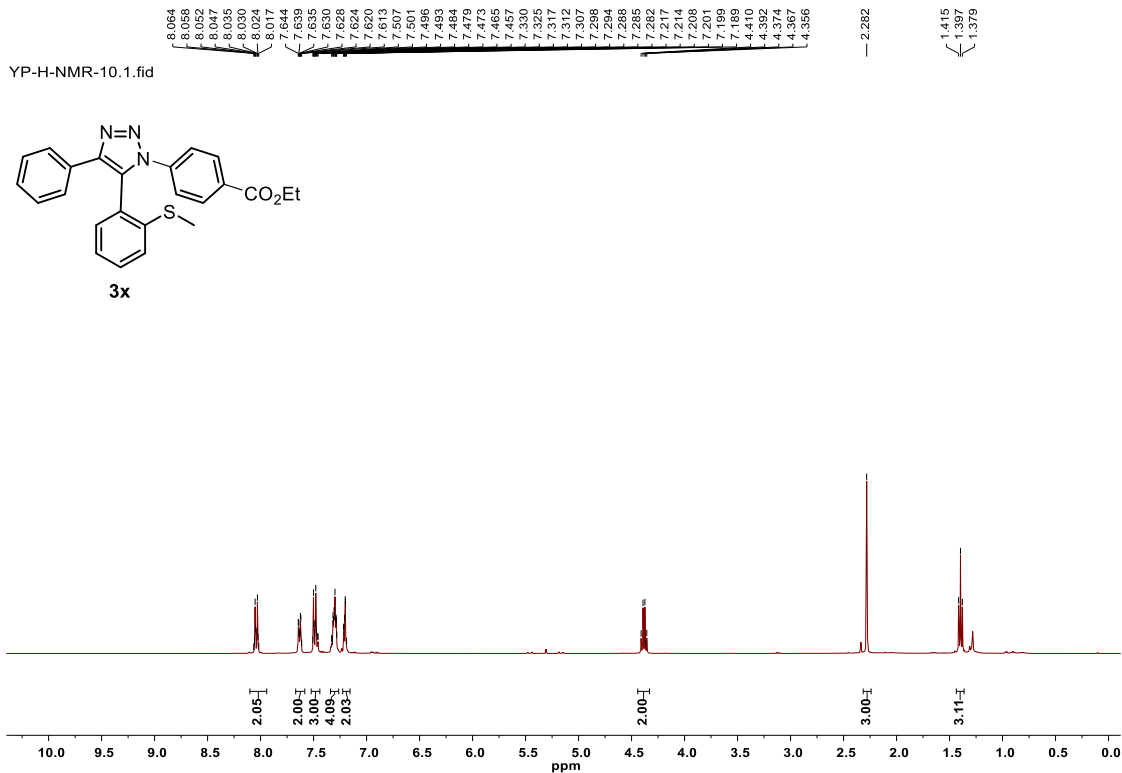

**<sup>1</sup>H NMR spectrum of 3x (400 MHz, CDCl<sub>3</sub>)**

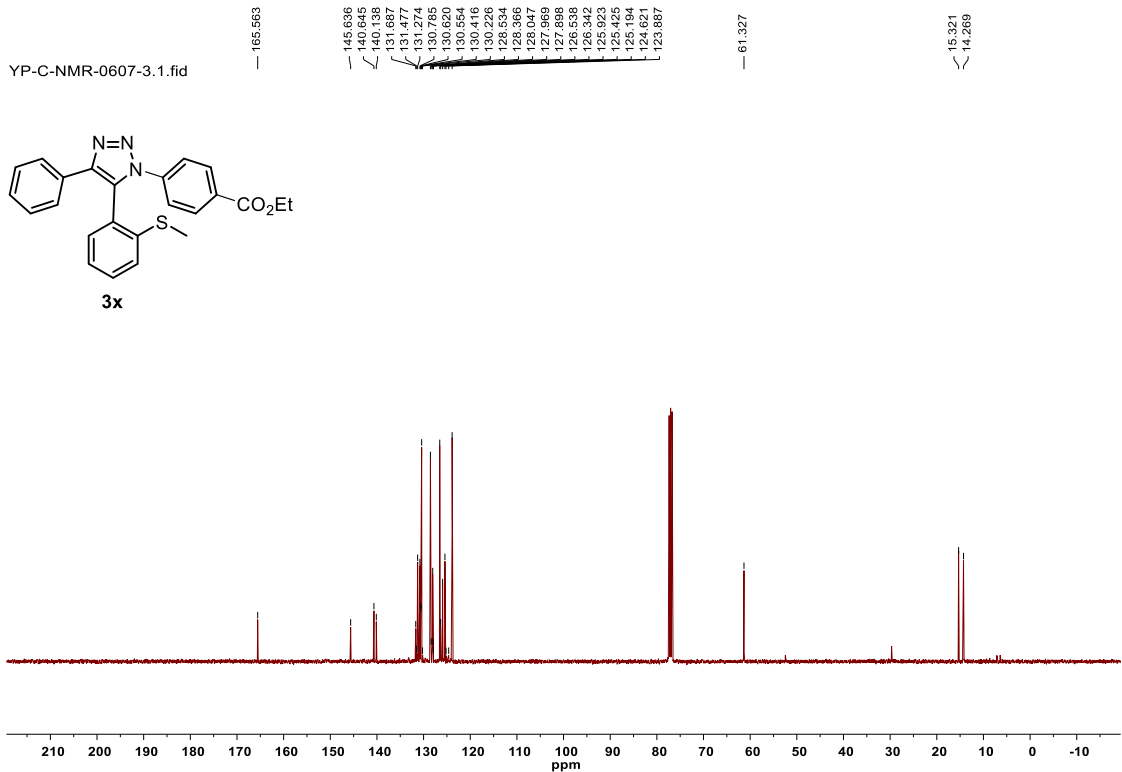

**<sup>13</sup>C NMR spectrum of 3x (101 MHz, CDCl<sub>3</sub>)**

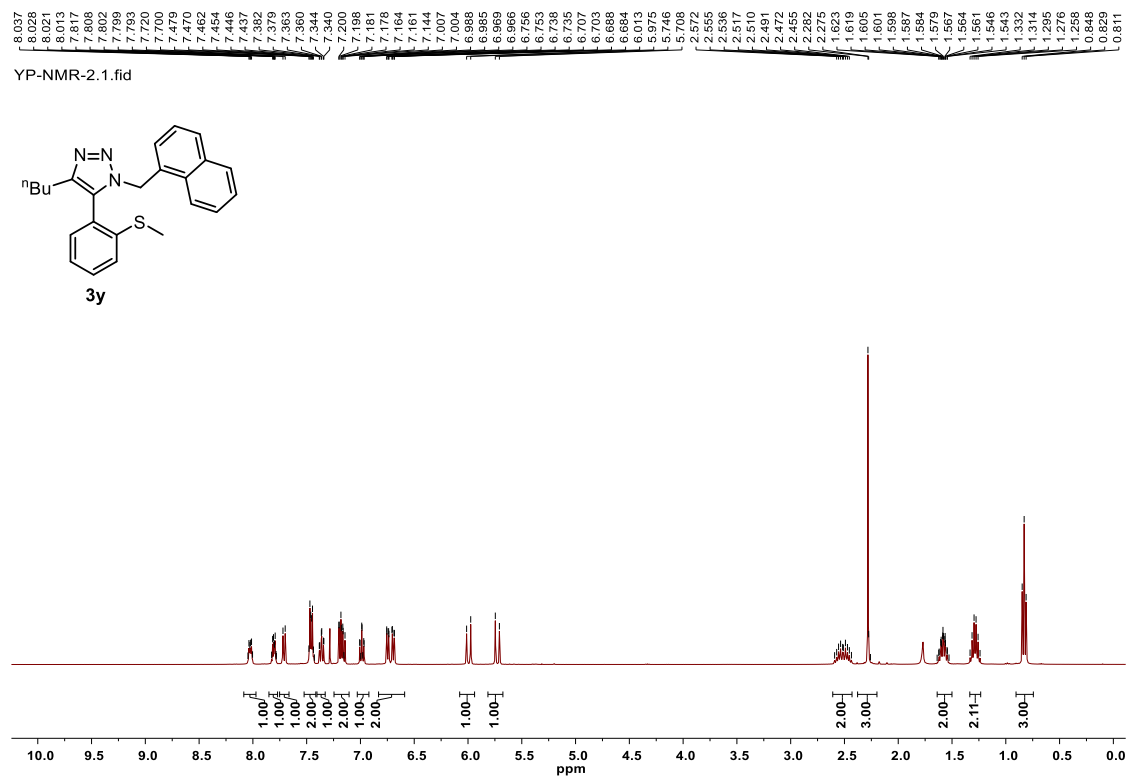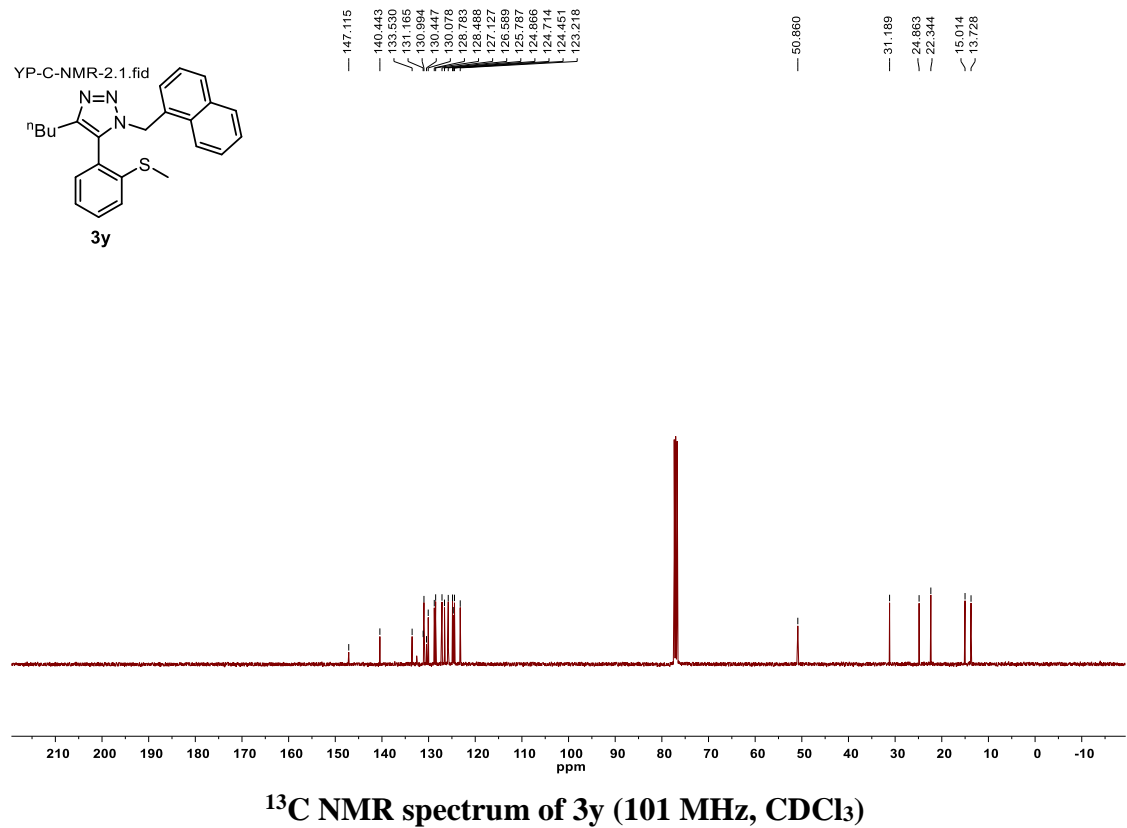

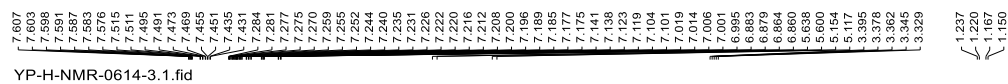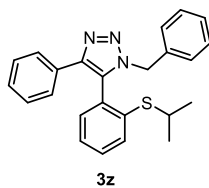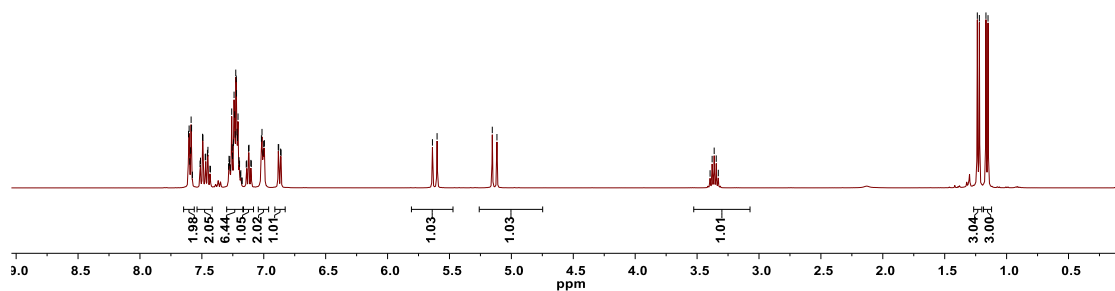

**<sup>1</sup>H NMR spectrum of 3z (400 MHz, CDCl<sub>3</sub>)**

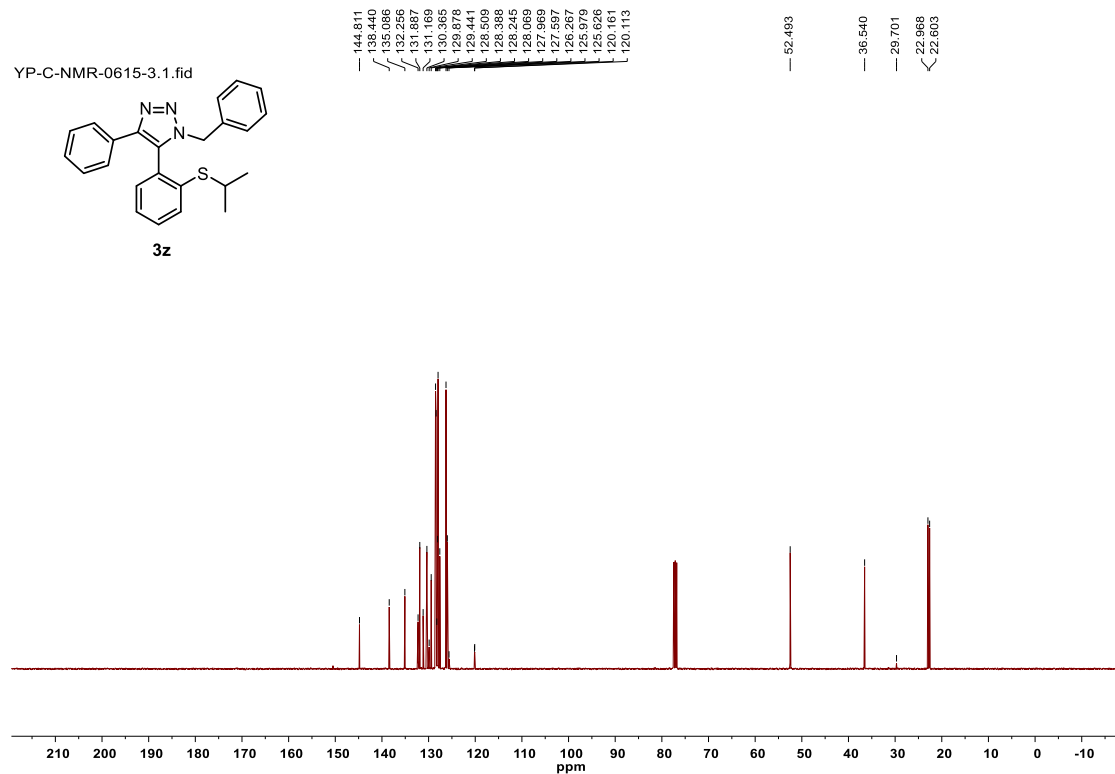

**<sup>13</sup>C NMR spectrum of 3z (101 MHz, CDCl<sub>3</sub>)**

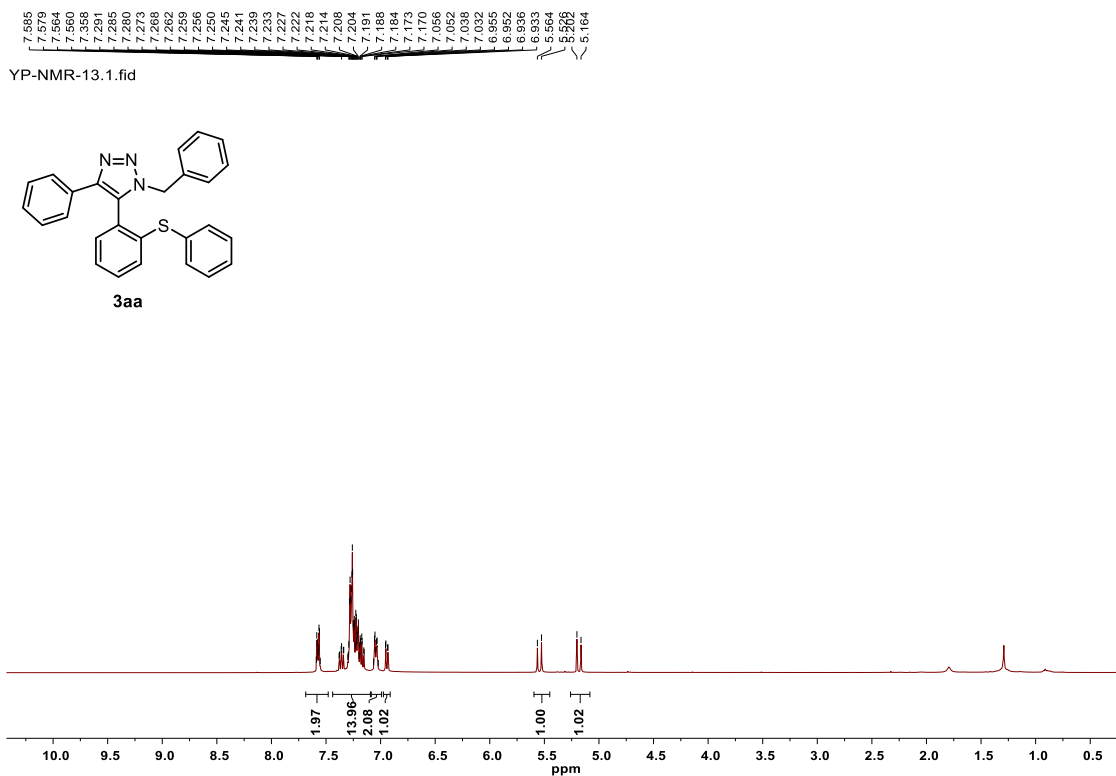

**<sup>1</sup>H NMR spectrum of 3aa (400 MHz, CDCl<sub>3</sub>)**

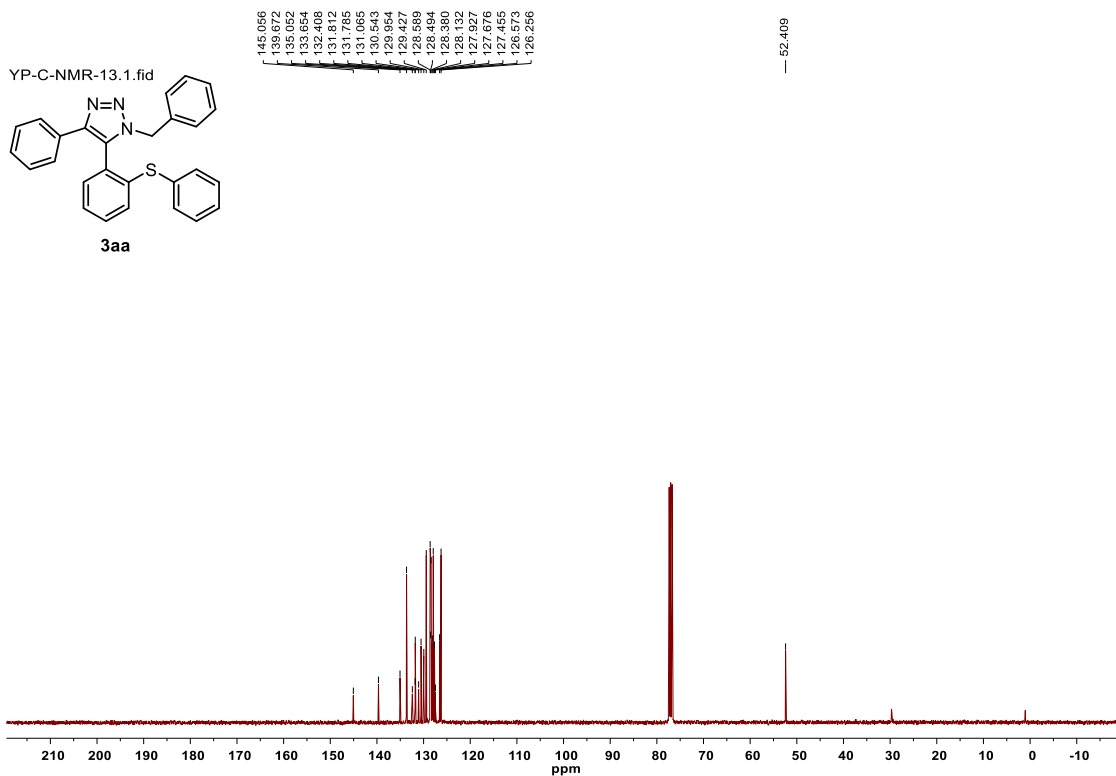

**<sup>13</sup>C NMR spectrum of 3aa (101 MHz, CDCl<sub>3</sub>)**

YP-H-NMR-0614-2.1.fid

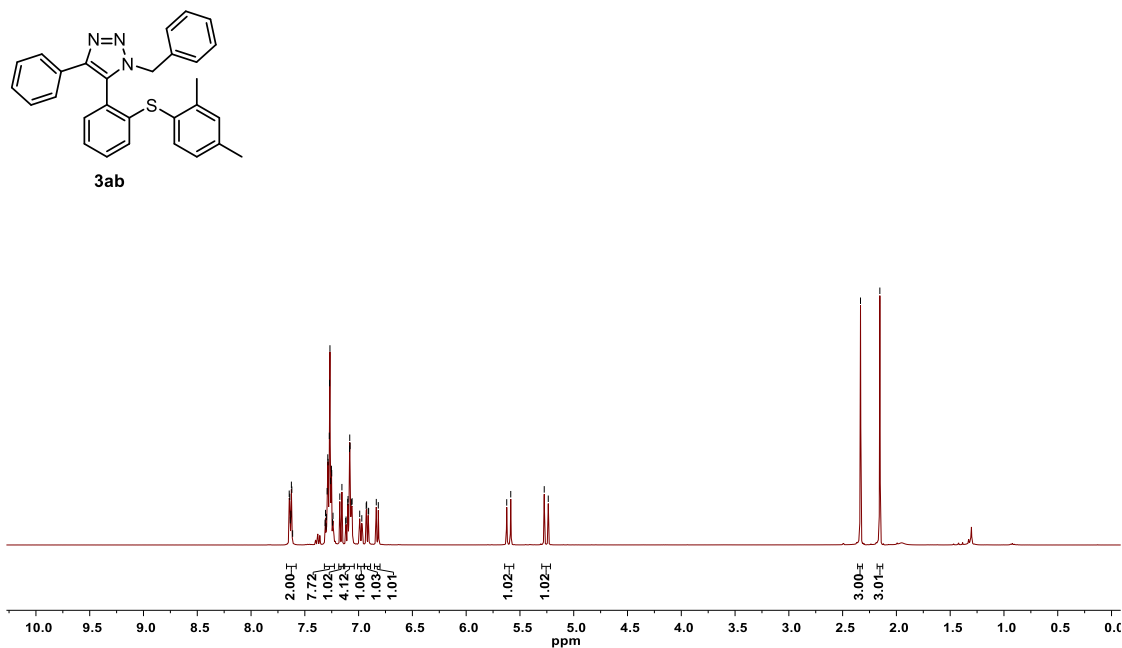

**<sup>1</sup>H NMR spectrum of 3ab (400 MHz, CDCl<sub>3</sub>)**

YP-C-NMR-0615-2.1.fid

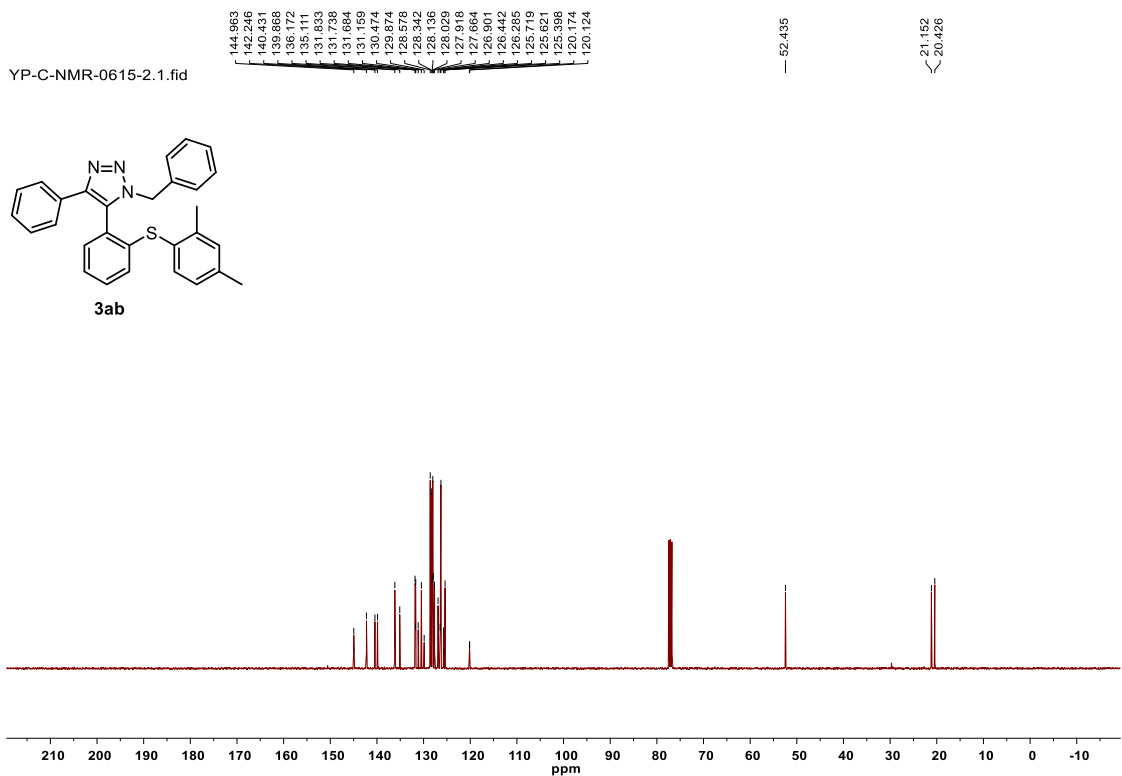

**<sup>13</sup>C NMR spectrum of 3ab (101 MHz, CDCl<sub>3</sub>)**

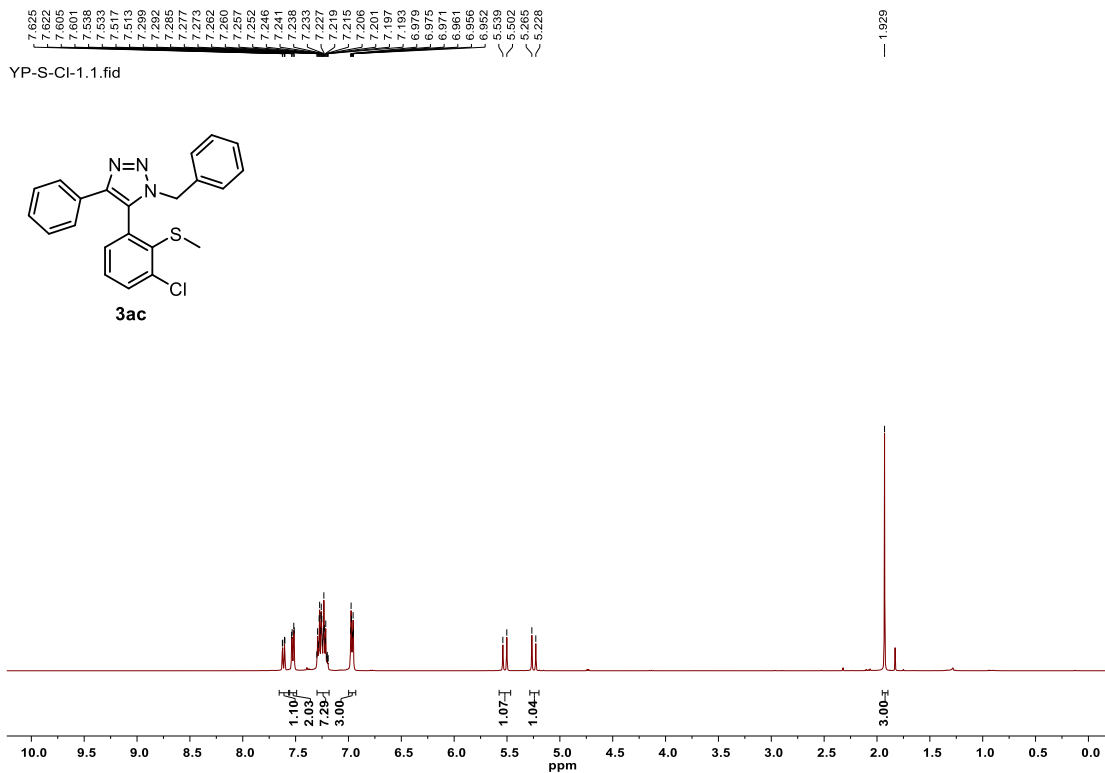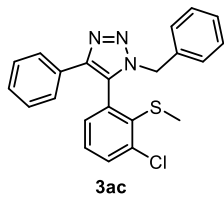

**<sup>1</sup>H NMR spectrum of 3ac (400 MHz, CDCl<sub>3</sub>)**

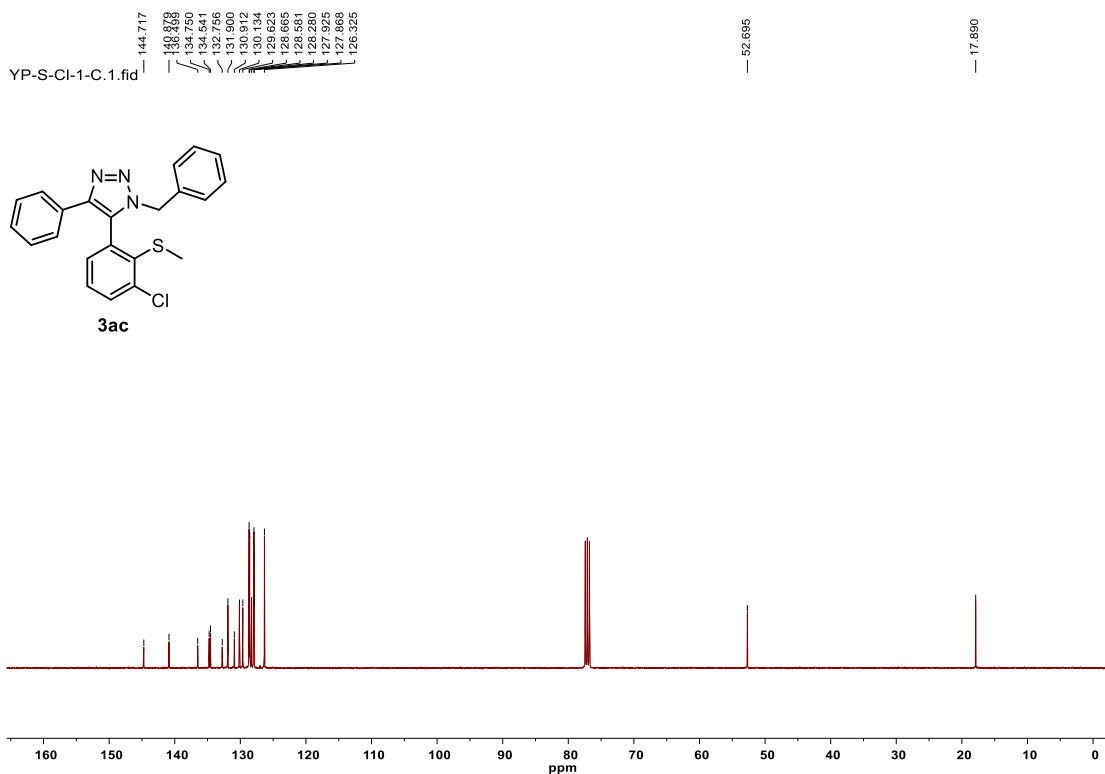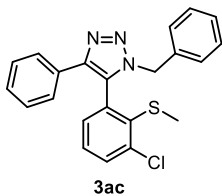

**<sup>13</sup>C NMR spectrum of 3ac (101 MHz, CDCl<sub>3</sub>)**

YP-4-Cl-1.1.fid

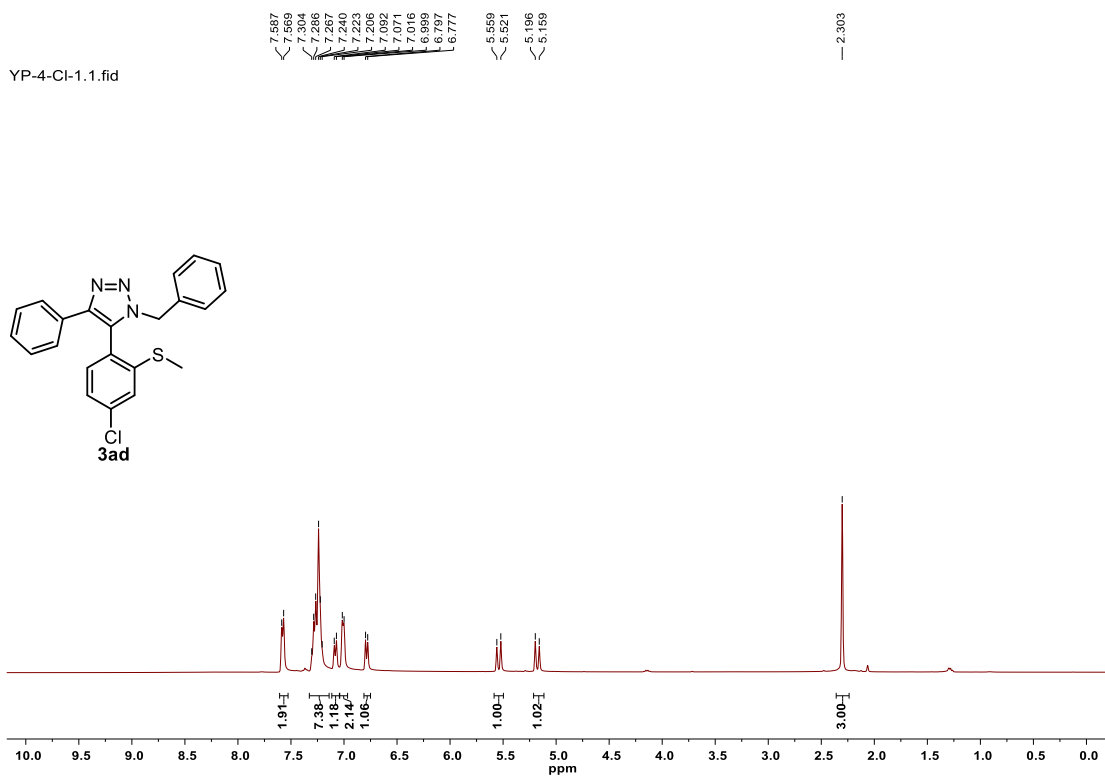

**<sup>1</sup>H NMR spectrum of 3ad (400 MHz, CDCl<sub>3</sub>)**

YP-4-Cl-1.2.fid

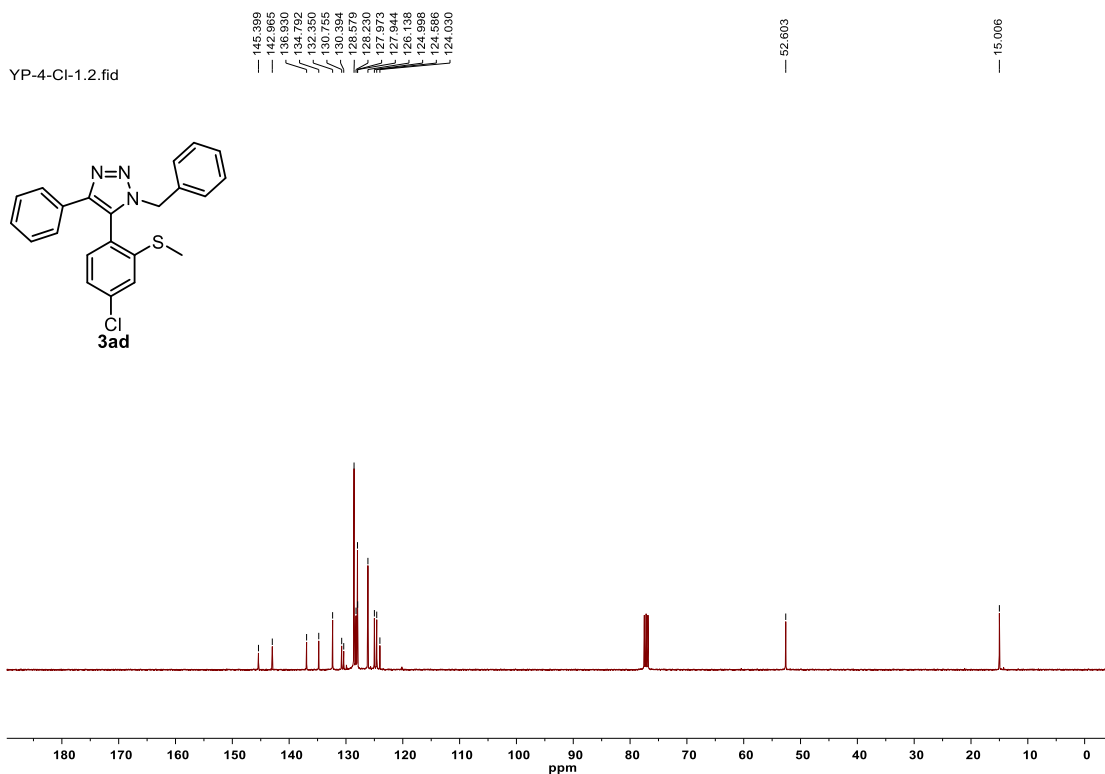

**<sup>13</sup>C NMR spectrum of 3ad (101 MHz, CDCl<sub>3</sub>)**

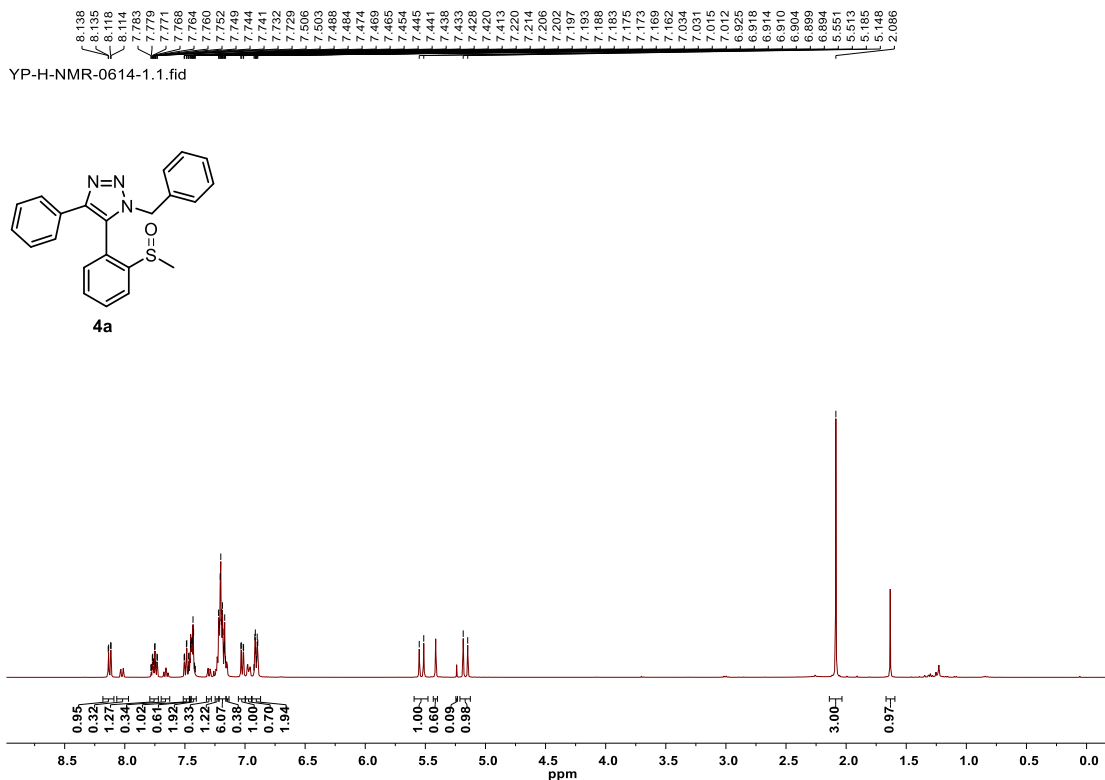

<sup>1</sup>H NMR spectrum of **4a** (400 MHz, CDCl<sub>3</sub>)

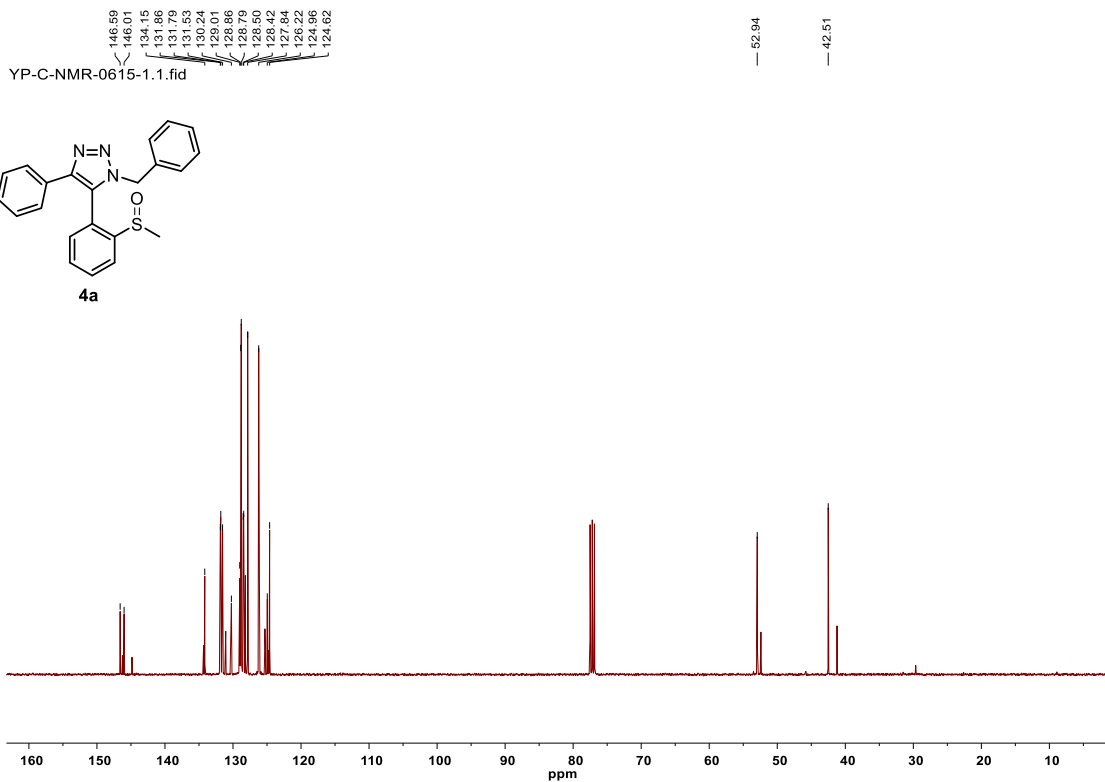

<sup>13</sup>C NMR spectrum of **4a** (101 MHz, CDCl<sub>3</sub>)



YP-H-NMR-0614-4.1.fid

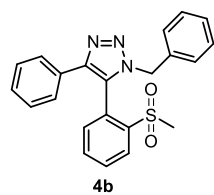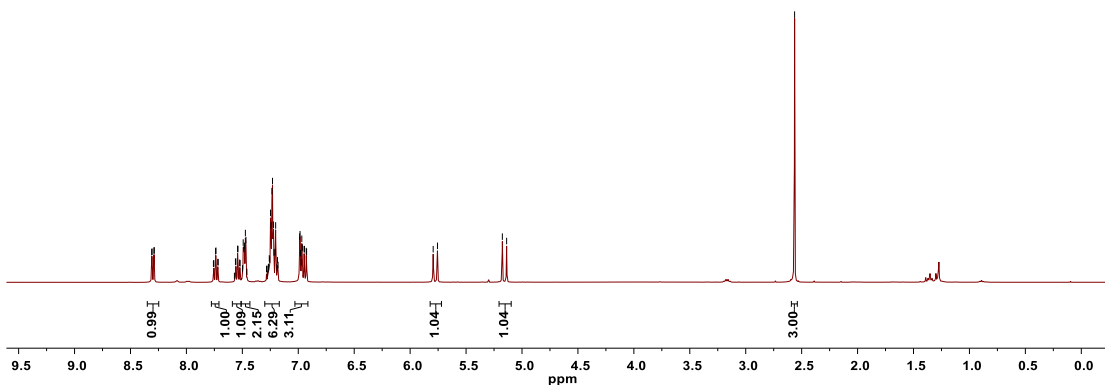

YP-C-NMR-0615-4.1.fid

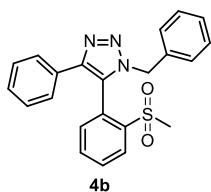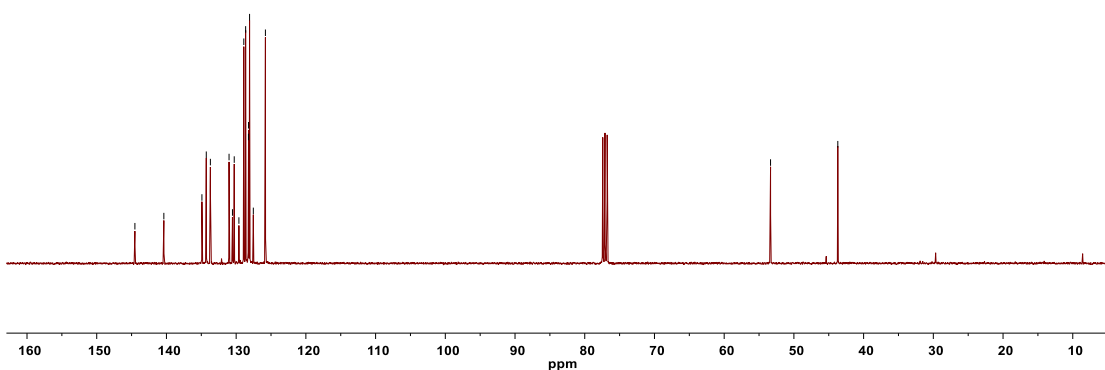

7.766  
7.763  
7.746  
7.743  
7.743  
7.695  
7.695  
7.640  
7.636  
7.620  
7.616  
7.528  
7.525  
7.506  
7.506  
7.499  
7.496  
7.491  
7.487  
7.483  
7.477  
7.477  
7.475  
7.465  
7.483  
7.324  
7.320  
7.317  
7.310  
7.307  
7.300  
7.300  
7.280  
7.280  
7.274  
7.274  
7.268  
7.264  
7.254  
7.250  
7.243  
7.238  
7.238  
7.226  
7.224  
7.220  
6.970  
6.967  
6.964  
6.951  
6.946  
5.446  
5.417  
5.399  
5.362

YP-H-NMR-0614-6.1.fid

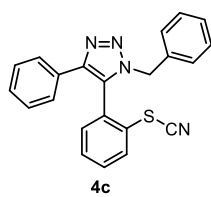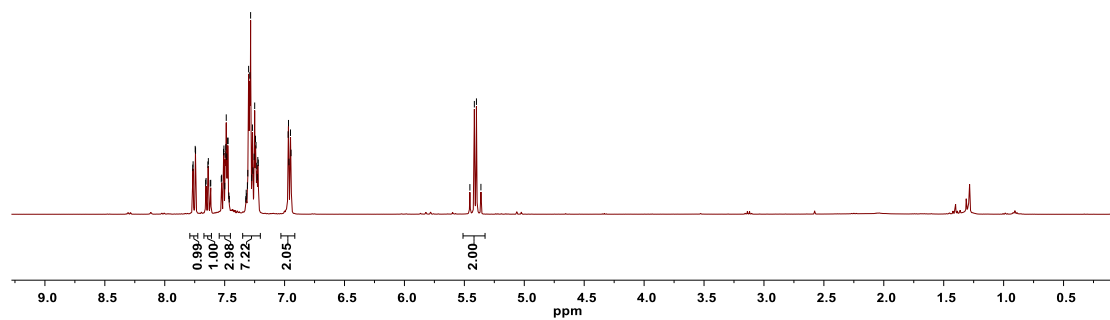

<sup>1</sup>H NMR spectrum of **4c** (400 MHz, CDCl<sub>3</sub>)

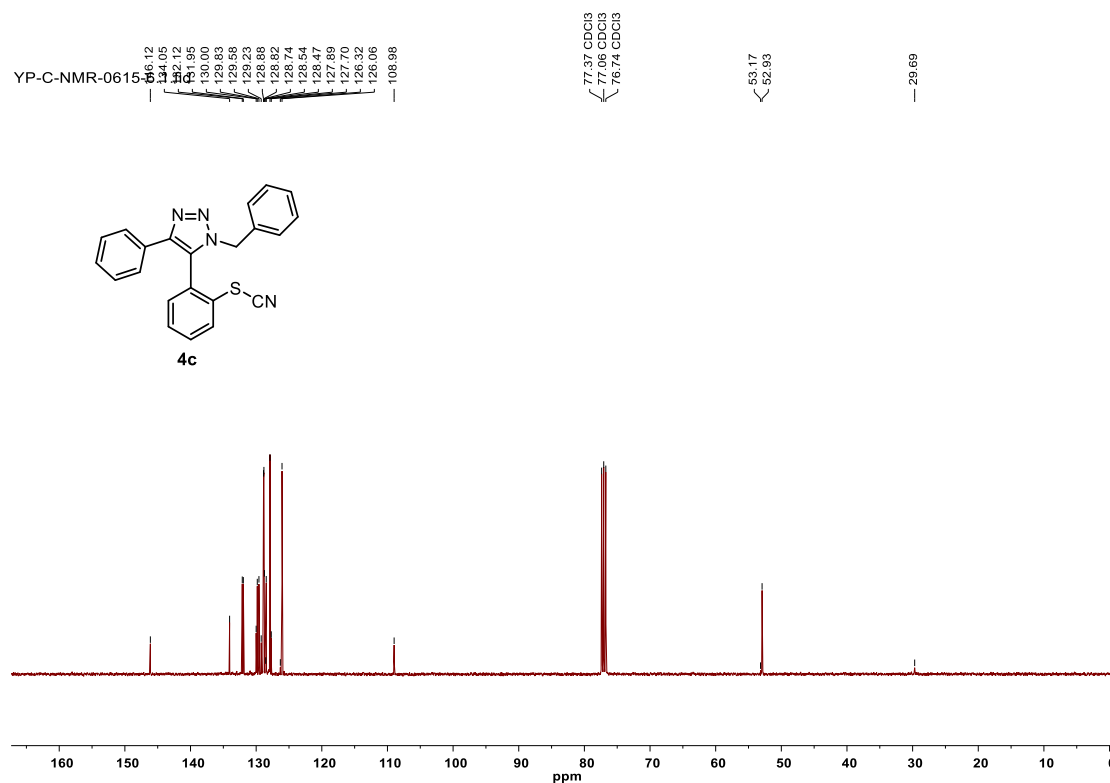

<sup>13</sup>C NMR spectrum of **4c** (101 MHz, CDCl<sub>3</sub>)

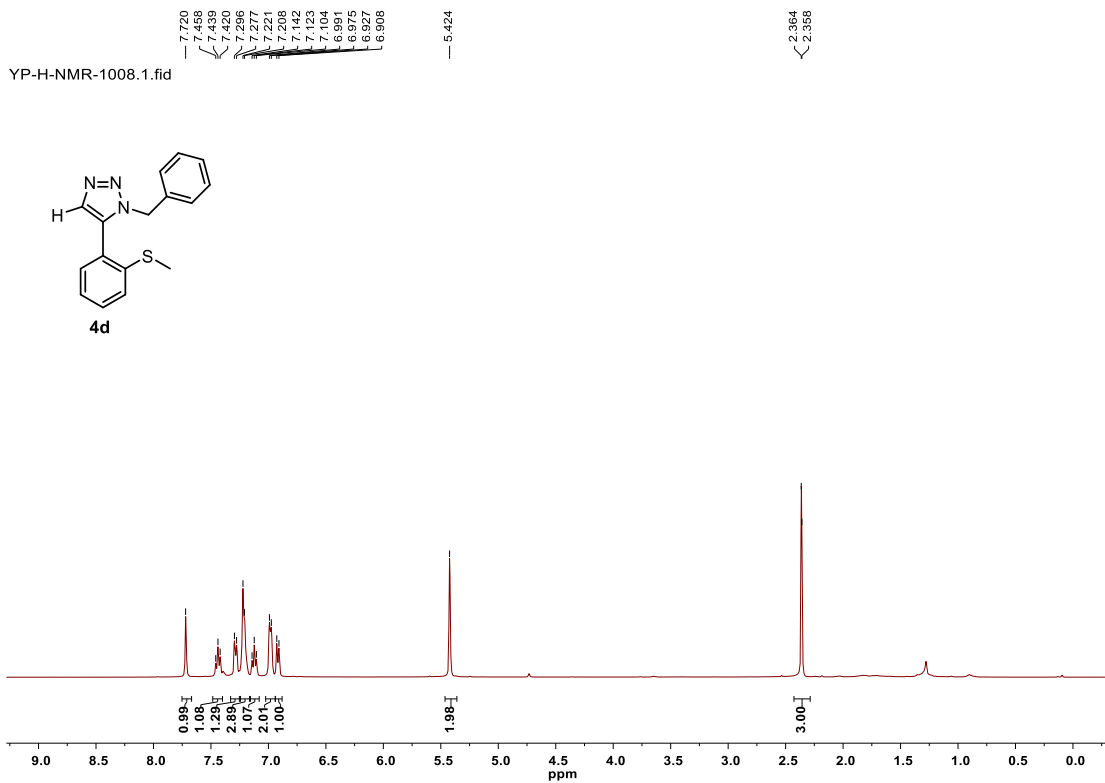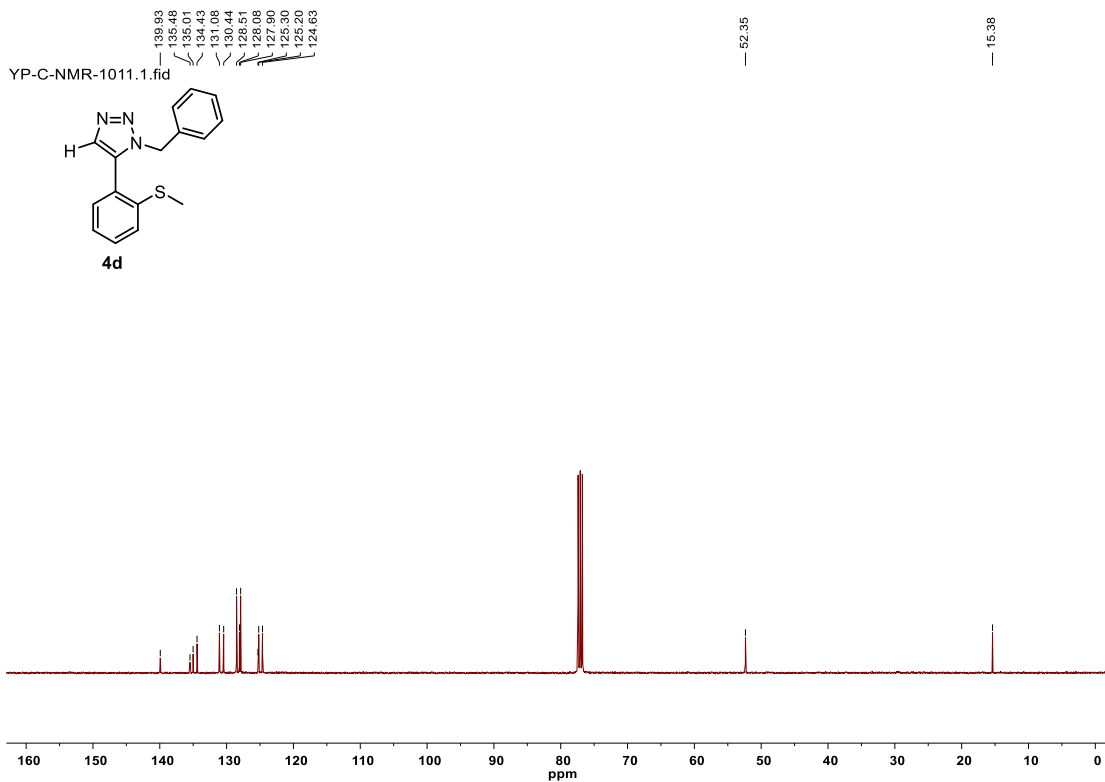

Supplement: d2ob02082c1.pdf [file d2ob02082c1.pdf]
